# Supplementary material for: Synthetic trisaccharides reveal discrimination ofendo-glycosidic linkages byexo-acting α-1,2-mannosidases in the endoplasmic reticulum
Source: Royal Society of Chemistry journal article supplement (doi:10.1039/d1ob00428j), 2021-01-01

## Supplementary Information

### **Synthetic trisaccharides reveal discrimination of endo-glycosidic linkages by exo-acting $\alpha$ -1,2-mannosidases in the endoplasmic reticulum**

Kyohei Nitta, Taiki Kuribara, Kiichiro Totani\*

Department of Materials and Life Science, Seikei University, Musashino-shi, Tokyo, 180-8633, Japan

#### **Table of Contents**

|                                                                             |    |
|-----------------------------------------------------------------------------|----|
| Fig. S1.....                                                                | 1  |
| Fig. S2.....                                                                | 1  |
| Fig. S3.....                                                                | 2  |
| General methods & materials for chemical synthesis.....                     | 3  |
| Chemical synthesis.....                                                     | 3  |
| General methods & materials for enzymatic assay.....                        | 20 |
| Enzymatic assay.....                                                        | 20 |
| References.....                                                             | 22 |
| $^1\text{H}$ NMR & $^{13}\text{C}$ NMR Spectra for the novel compounds..... | 24 |

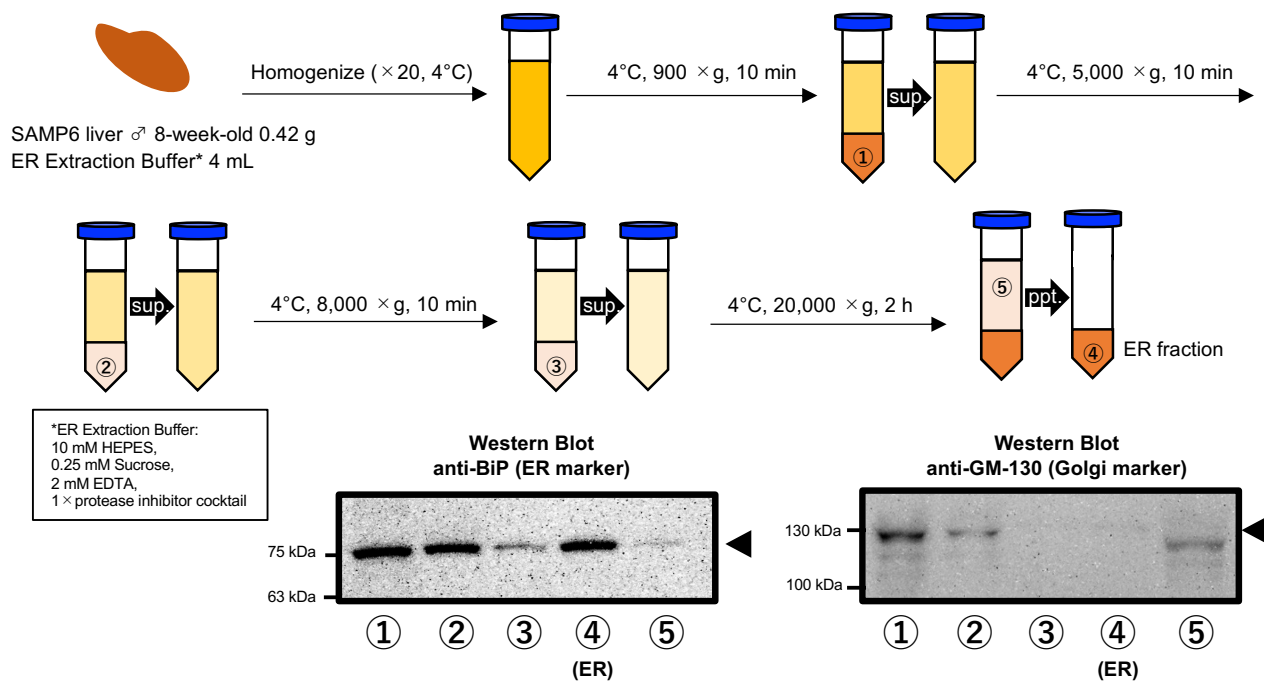

**Fig. S1** Extraction of ER fraction from SAMP6 liver.

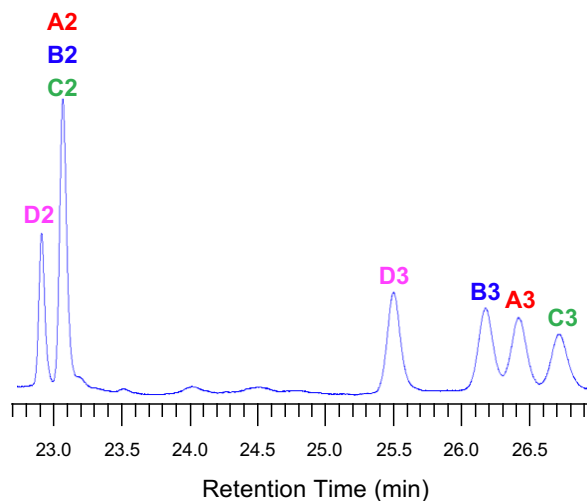

**Fig. S2** HPLC chromatogram of the substrates (A3, B3, C3 and D3) and the products (A2, B2, C2 and D2).

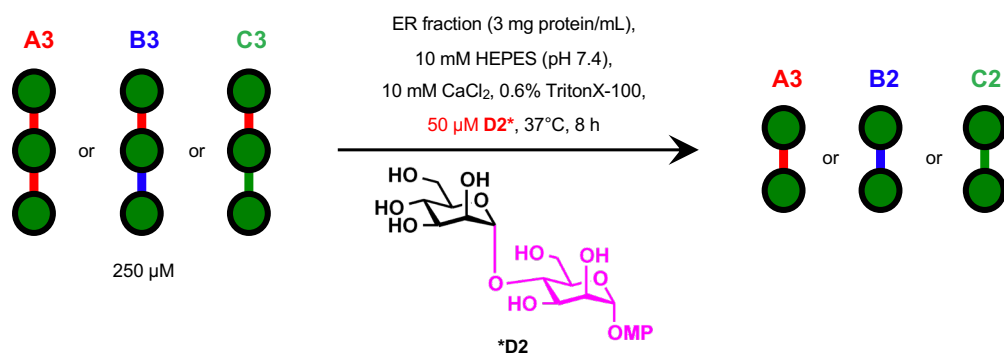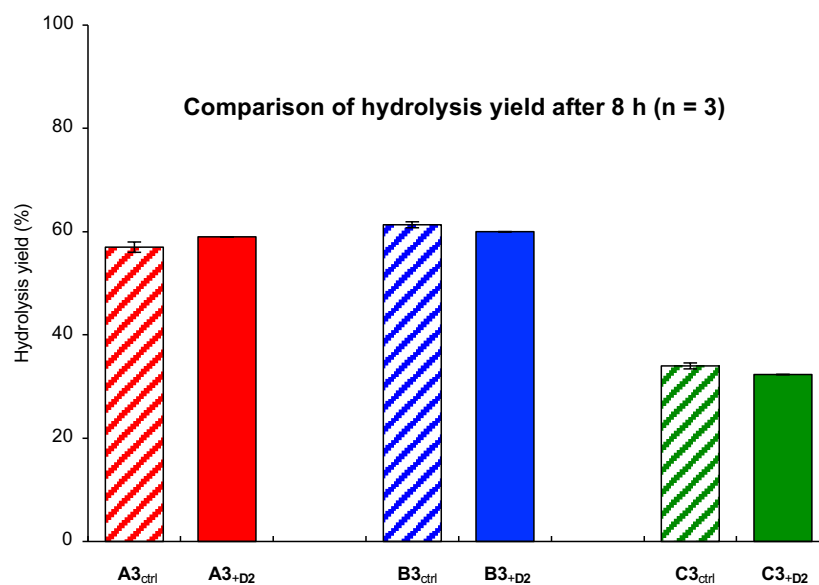

**Fig. S3** Influence on the hydrolysis yield of **A3** (250 μM), **B3** (250 μM) or **C3** (250 μM) by adding internal standard **D2** (50 μM). Each data point represents the mean value with the standard deviation ( $n = 3$ ).

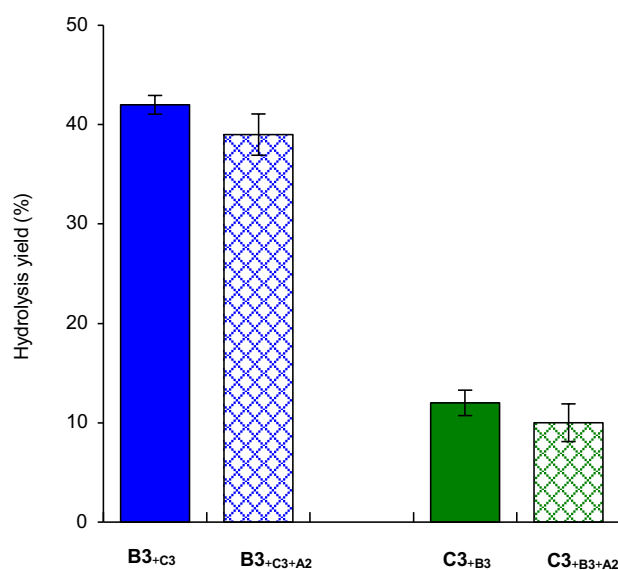

**Fig. S4** Influence on the hydrolysis yield after 6h from competitive assay of **B3** (250 μM) with **C3** (250 μM) in the ER fraction (3 mg/mL) by adding **A2** (250 μM). Each data point represents the mean value with the standard deviation ( $n = 3$ ).

## General methods & materials for chemical synthesis

Unless otherwise indicated, all reactions were performed under an argon atmosphere in oven-dried glassware. All reagents and dry solvents were used as purchased without further purification. Column chromatography on silica gel was carried out with silica gel 60N (40-50  $\mu\text{m}$ ) or silica gel 60N (40-100  $\mu\text{m}$ ) from Kanto Chemical Co. Column chromatography was also carried out using Automated Flash Chromatography System Smart Flash EPCLC AI-580S (Yamazen Co.) with Hi-Flash column or Ultrapack column. Gel filtration chromatography was carried out with Sephadex G-10 or Sephadex LH-20 from GE Healthcare. TLC was performed on pre-coated glass plates using silica gel (Merck, 60, F254) and detected by UV light (254 nm) and/or by staining reagents such as Orcinol/ $\text{H}_2\text{SO}_4$ . Molecular sieves AW-300 used in the reactions, were activated for 12 h *in vacuo* at 180  $^\circ\text{C}$ .  $^1\text{H}$  NMR spectra were recorded on a JEOL JNM-ECA500 (500 MHz) spectrometer using  $\text{CDCl}_3$  ( $\delta_{\text{H}}$  7.26),  $\text{D}_2\text{O}$  ( $\delta_{\text{H}}$  4.79) or  $\text{CD}_3\text{OD}$  [ $\delta_{\text{H}}$  3.31 (central line of a quintet)] as the NMR solvents, whereby the spectra were referenced to the corresponding residual protonated solvent signals.  $^{13}\text{C}$  NMR spectra were recorded on a JEOL JNM-ECA500 (125 MHz) spectrometer with  $\text{CDCl}_3$  [ $\delta_{\text{C}}$  77.2 (central line of a triplet)] or  $\text{CD}_3\text{OD}$  [ $\delta_{\text{C}}$  49.2 (central line of a septet)], whereby the spectra were referenced to the solvent signals. High-resolution mass spectra (HRMS) were obtained from a Thermo SCIENTIFIC Q-Exactive (ESI-TOF) mass spectrometer.

## Chemical synthesis

### 2-*O*-Acetyl-3,4,6-tri-*O*-benzyl-1-deoxy- $\alpha$ -D-mannopyranosyl fluoride (2).

DAST (10.5  $\mu\text{L}$ , 0.0801 mmol) was added to a cold ( $-40^\circ\text{C}$ ) solution of **1** (24.4 mg, 0.0482 mmol) in  $\text{CH}_2\text{Cl}_2$  (0.500 mL). After stirring the reaction mixture for 3 h at  $0^\circ\text{C}$ , another portion of DAST (10.5  $\mu\text{L}$ , 0.0801 mmol) was added at  $-40^\circ\text{C}$ . After stirring the reaction mixture for 80 min at  $0^\circ\text{C}$ , the reaction was quenched with MeOH (0.200 mL, 4.94 mmol) at  $-20^\circ\text{C}$ . The mixture was diluted with EtOAc (100 mL) and washed with saturated aq.  $\text{NaHCO}_3$  (100 mL  $\times$  2) and brine (100 mL  $\times$  2). The organic layer was dried over  $\text{Na}_2\text{SO}_4$ , filtered, and concentrated *in vacuo*. The residue was purified by column chromatography on silica gel (EtOAc/hexane, 1:3, v/v) to give **2** (18.9 mg, 80%). Physical data were consistent with those reported previously<sup>(1)</sup>: TLC,  $R_f$  0.44 (EtOAc/hexane, 1:3, v/v);  $^1\text{H}$  NMR (500 MHz,  $\text{CDCl}_3$ )  $\delta$  7.36-7.14 (m, 15H,  $(-\text{CH}_2\text{Ph})_3$ ), 5.61 (dd,  $J = 2.3, 2.3$  Hz,  $J_{\text{H-F}} = 49.3$  Hz, 1H, H-1), 5.47 (t,  $J = 2.3$  Hz, 1H, H-2), 4.86, 4.71 (ABq,  $J = 10.9$  Hz, 2H,  $(-\text{CH}_2\text{Ph})_3$ ), 4.68, 4.51 (ABq,  $J = 12.6$  Hz, 2H,  $(-\text{CH}_2\text{Ph})_3$ ), 4.56, 4.50 (ABq,  $J = 11.5$  Hz, 2H,  $(-\text{CH}_2\text{Ph})_3$ ), 3.97-3.94 (m, 3H, H-3, H-5, H-6), 3.81 (dd,  $J = 3.4, 10.6$  Hz, 1H, H-6'), 3.71 (dd,  $J = 1.2, 10.9$  Hz, 1H, H-4), 2.16 (s, 3H,  $-\text{CH}_3$  of Ac).

### 1,2-di-*O*-Acetyl-3,4,6-tri-*O*-benzyl- $\alpha$ -D-mannopyranose (3).

Compound **1** (67.1 mg, 0.133 mmol) was diluted in AcOH (1.30 mL, 22.7 mmol) at  $0^\circ\text{C}$ . After stirring the reaction mixture for 2 h at  $0^\circ\text{C}$ ,  $\text{Ac}_2\text{O}$  (1.30 mL, 1.38 mmol) and DMAP (32.3 mg, 0.264 mmol) were added at  $0^\circ\text{C}$ . After stirring the reaction mixture for 2 h at room temperature, another portion of  $\text{Ac}_2\text{O}$  (1.30 mL, 1.38 mmol) was added at  $0^\circ\text{C}$ . After stirring the reaction mixture for 40 min at room temperature, the reaction was quenched with MeOH (2.6 mL, 6.42 mmol) at  $0^\circ\text{C}$ . The mixture was diluted with EtOAc (100 mL) and washed with saturated aq.  $\text{NaHCO}_3$  (65 mL  $\times$  3) and brine (65 mL  $\times$  3). The organic layer was dried over  $\text{Na}_2\text{SO}_4$ ,

filtered, and concentrated *in vacuo*. The residue was purified by column chromatography on silica gel (EtOAc/hexane, 1:2, v/v) to give **3** (57.0 mg, 80%). Physical data were consistent with those reported previously<sup>(2)</sup>: TLC,  $R_f$  0.44 (EtOAc/toluene, 6:1, v/v);  $^1\text{H}$  NMR (500 MHz,  $\text{CDCl}_3$ ) ( $\alpha$ -isomer)  $\delta$  7.36-7.13 (m, 15H,  $(-\text{CH}_2\text{Ph})_3$ ), 6.13 (d,  $J = 1.7$  Hz, 1H, H-1), 5.37 (dd,  $J = 1.7, 2.6$  Hz, 1H, H-2), 4.86, 4.73 (ABq,  $J = 10.9$  Hz, 2H,  $(-\text{CH}_2\text{Ph})_3$ ), 4.68, 4.51 (ABq,  $J = 12.6$  Hz, 2H,  $(-\text{CH}_2\text{Ph})_3$ ), 4.56, 4.51 (ABq,  $J = 11.5$  Hz, 2H,  $(-\text{CH}_2\text{Ph})_3$ ), 4.00-3.96 (m, 2H, H-3, H-6), 3.88-3.83 (m, 1H, H-5), 3.81 (dd,  $J = 3.4, 10.6$  Hz, 1H, H-4), 3.69 (dd,  $J = 1.7, 10.9$  Hz, 1H, H-6'), 2.16 (s, 3H,  $-\text{CH}_3$  of Ac), 2.07 (s, 3H,  $-\text{CH}_3$  of Ac).

#### 4-Methoxyphenyl 2-*O*-acetyl-3,4,6-tri-*O*-benzyl- $\alpha$ -D-mannopyranoside (**4**).

*p*-Methoxyphenol (372 mg, 3.00 mmol),  $\text{Et}_3\text{N}$  (0.140 mL, 1.00 mmol), and  $\text{BF}_3 \cdot \text{Et}_2\text{O}$  (0.520 mL, 4.14 mmol) were added to a cold ( $0^\circ\text{C}$ ) solution of **3** (1.10 g, 2.06 mmol) in  $\text{CH}_2\text{Cl}_2$  (20.0 mL). After stirring the reaction mixture for 4 h at room temperature, another portion of  $\text{Et}_3\text{N}$  (35.0  $\mu\text{L}$ , 0.250 mmol) and  $\text{BF}_3 \cdot \text{Et}_2\text{O}$  (0.130 mL, 1.03 mmol) were added at  $0^\circ\text{C}$ . After stirring the reaction mixture for 30 min at room temperature, another portion of *p*-Methoxyphenol (93.5 mg, 0.750 mmol) was added at  $0^\circ\text{C}$ . After stirring the reaction mixture for 30 min at room temperature, the mixture was diluted with EtOAc (200 mL) and washed with saturated aq.  $\text{NaHCO}_3$  (200 mL) and brine (200 mL). The organic layer was dried over  $\text{Na}_2\text{SO}_4$ , filtered, and concentrated *in vacuo*. The residue was purified by column chromatography on silica gel (EtOAc/toluene, 1:20, v/v) to give **4** (1.15 g, 94%). Physical data were consistent with those reported previously<sup>(3)</sup>: TLC,  $R_f$  0.60 (EtOAc/toluene, 6:1, v/v);  $^1\text{H}$  NMR (500 MHz,  $\text{CDCl}_3$ )  $\delta$  7.37-7.16 (m, 15H,  $(-\text{CH}_2\text{Ph})_3$ ), 6.99 (dd,  $J = 2.3, 6.9$  Hz, 2H, Ph of MP), 6.79 (dd,  $J = 2.3, 6.9$  Hz, 2H, Ph of MP), 5.54 (dd,  $J = 1.7, 3.4$  Hz, 1H, H-2), 5.46 (d,  $J = 1.7$  Hz, 1H, H-1), 4.89, 4.51 (ABq,  $J = 10.9$  Hz, 2H,  $(-\text{CH}_2\text{Ph})_3$ ), 4.77, 4.61 (ABq,  $J = 10.9$  Hz, 2H,  $(-\text{CH}_2\text{Ph})_3$ ), 4.66, 4.45 (ABq,  $J = 12.0$  Hz, 2H,  $(-\text{CH}_2\text{Ph})_3$ ), 4.18 (dd,  $J = 3.4, 9.2$  Hz, 1H, H-3), 4.00 (t,  $J = 9.2$  Hz, 1H, H-4), 3.96-3.94 (m, 1H, H-5), 3.81 (dd,  $J = 4.0, 10.9$  Hz, 1H, H-6), 3.75 (s, 3H,  $-\text{OCH}_3$  of MP), 3.68 (dd,  $J = 1.7, 10.9$  Hz, 1H, H-6), 2.18 (s, 3H,  $-\text{CH}_3$  of Ac).

#### 4-Methoxyphenyl 3,4,6-tri-*O*-benzyl- $\alpha$ -D-mannopyranoside (**5**).

$\text{NaOMe}$  (28% in MeOH; 1.00 mL, 5.19 mmol) was added to a cold ( $0^\circ\text{C}$ ) solution of **4** (1.12 g, 1.88 mmol) in MeOH/THF (1:1, v/v, 20.0 mL). After stirring the reaction mixture for 30 min at room temperature, the reaction mixture was neutralized with Amberlyst 15E at  $0^\circ\text{C}$ . The mixture was filtered and concentrated *in vacuo*, before the residue was purified by column chromatography on silica gel (EtOAc/toluene, 1:6, v/v) to give **5** (0.979 g, 94%). Physical data were consistent with those reported previously<sup>(4)</sup>: TLC,  $R_f$  0.26 (EtOAc/toluene, 1:6, v/v);  $^1\text{H}$  NMR (500 MHz,  $\text{CDCl}_3$ )  $\delta$  7.40-7.17 (m, 15H,  $(-\text{CH}_2\text{Ph})_3$ ), 7.00 (dd,  $J = 2.3, 6.9$  Hz, 2H, Ph of MP), 6.79 (dd,  $J = 2.3, 6.6$  Hz, 2H, Ph of MP), 5.52 (d,  $J = 1.4$  Hz, 1H, H-1), 4.85, 4.54 (ABq,  $J = 10.9$  Hz, 2H,  $(-\text{CH}_2\text{Ph})_3$ ), 4.78, 4.75 (ABq,  $J = 11.5$  Hz, 2H,  $(-\text{CH}_2\text{Ph})_3$ ), 4.62, 4.45 (ABq,  $J = 12.0$  Hz, 2H,  $(-\text{CH}_2\text{Ph})_3$ ), 4.22 (m, 1H, H-2), 4.08 (dd,  $J = 3.4, 8.6$  Hz, 1H, H-3), 3.97 (t,  $J = 8.6$  Hz, 1H, H-4), 3.93-3.90 (m, 1H, H-5), 3.78-3.73 (m, 4H,  $-\text{OCH}_3$  of MP, H-6), 3.66 (dd,  $J = 1.7, 10.9$  Hz, 1H, H-6').

#### 4-Methoxyphenyl 3,4,6-tri-*O*-benzyl-2-*O*-pivaloyl- $\alpha$ -D-mannopyranoside (**6**).

PivCl (45.0  $\mu\text{L}$ , 0.343 mmol),  $\text{Et}_3\text{N}$  (95.0  $\mu\text{L}$ , 0.744 mmol), and DMAP (43.5 mg, 0.356 mmol) were added to

a cold (0°C) solution of **5** (82.5 mg, 0.148 mmol) in CH<sub>2</sub>Cl<sub>2</sub> (3.00 mL). After stirring the reaction mixture for 90 min at 50°C, another portion of PivCl (45.0 μL, 0.343 mmol) and Et<sub>3</sub>N (95.0 μL, 0.744 mmol) were added at 0°C. After stirring the reaction mixture for 40 min at 50°C, the mixture was diluted with EtOAc (200 mL) and washed with saturated aq. NaHCO<sub>3</sub> (200 mL) and brine (200 mL). The organic layer was dried over Na<sub>2</sub>SO<sub>4</sub>, filtered, and concentrated *in vacuo*, before the residue was purified by column chromatography on silica gel (EtOAc/hexane, 1:10, v/v) to give **6** (87.0 mg, 92%): TLC, *R<sub>f</sub>* 0.75 (EtOAc/toluene, 1:6, v/v); <sup>1</sup>H NMR (500 MHz, CDCl<sub>3</sub>) δ 7.36-7.16 (m, 15H, (-CH<sub>2</sub>Ph)<sub>3</sub>), 7.01 (dd, *J* = 2.3, 7.2 Hz, 2H, Ph of MP), 6.79 (dd, *J* = 2.3, 6.9 Hz, 2H, Ph of MP), 5.54 (dd, *J* = 2.3, 3.2 Hz, 1H, H-2), 5.43 (d, *J* = 2.3 Hz, 1H, H-1), 4.87, 4.53 (ABq, *J* = 10.9 Hz, 2H, -(CH<sub>2</sub>Ph)<sub>3</sub>), 4.75, 4.58 (ABq, *J* = 10.9 Hz, 2H, -(CH<sub>2</sub>Ph)<sub>3</sub>), 4.62, 4.46 (ABq, *J* = 12.0 Hz, 2H, -(CH<sub>2</sub>Ph)<sub>3</sub>), 4.19 (m, 1H, H-3), 4.02-3.94 (m, 2H, H-4, H-5), 3.80 (dd, *J* = 3.4, 10.9 Hz, 1H, H-6), 3.75 (s, 3H, -OCH<sub>3</sub> of MP), 3.71 (dd, *J* = 1.5, 10.9 Hz, 1H, H-6'), 1.24 (s, 3H, -(CH<sub>3</sub>)<sub>3</sub> of Piv); <sup>13</sup>C NMR (125 MHz, CDCl<sub>3</sub>) δ 177.80, 155.21, 150.11, 138.44, 138.34, 138.23, 128.42×2, 128.38×2, 128.30×2, 128.16×2, 128.02×2, 127.78, 127.70, 127.55×2, 127.52, 118.09×2, 114.64×2, 97.11, 78.33, 75.32, 74.17, 73.22, 71.96, 71.63, 68.95, 68.12, 55.71, 39.13, 27.27×3; HRMS calcd. for C<sub>39</sub>H<sub>44</sub>NaO<sub>8</sub> (M+Na)<sup>+</sup> *m/z* 663.2934, found 663.2921.

#### 4-Methoxyphenyl 4,6-*O*-benzylidene-2-*O*-pivaloyl- $\alpha$ -D-mannopyranoside (**8**).

Pd(OH)<sub>2</sub> (20% on carbon, 64.0 mg) was added to a solution of **6** (87.0 mg, 0.136 mmol) in MeOH (2.00 mL). After stirring the reaction mixture under H<sub>2</sub> atmosphere for 17 h at room temperature, the mixture was filtered through a pad of celite. The filtrate and washings were concentrated *in vacuo* to give **7**. BDA (0.200 mL, 1.34 mmol) was added to a cold (0°C) solution of unpurified **7** in MeCN (2.00 mL). After stirring the reaction mixture for 5 min at 0°C, CSA (49.0 mg, 0.211 mmol) was added at 0°C. After stirring the reaction mixture for 90 min at room temperature, the mixture was diluted with EtOAc (100 mL) and washed with saturated aq. NaHCO<sub>3</sub> (100 mL) and brine (100 mL). The organic layer was dried over Na<sub>2</sub>SO<sub>4</sub>, filtered, and concentrated *in vacuo*. The residue was purified by column chromatography on silica gel (EtOAc/hexane, 1:6, v/v) to give **8** (61.6 mg, 99%): TLC, *R<sub>f</sub>* 0.46 (EtOAc/hexane, 1:3, v/v); <sup>1</sup>H NMR (500 MHz, CDCl<sub>3</sub>) δ 7.52-7.34 (m, 5H, Ph of Bzl), 6.99 (dd, *J* = 2.3, 6.9 Hz, 2H, Ph of MP), 6.83 (dd, *J* = 2.3, 6.9 Hz, 2H, Ph of MP), 5.62 (s, 1H, H of Bzl), 5.38 (dd, *J* = 1.7, 3.4 Hz, 1H, H-2), 5.35 (d, *J* = 1.7 Hz, 1H, H-1), 4.44 (dd, *J* = 3.4, 9.7 Hz, 1H, H-3), 4.23 (dd, *J* = 5.2, 10.3 Hz, 1H, H-6), 4.06-4.01 (m, 1H, H-5), 3.92 (t, *J* = 9.7 Hz, 1H, H-4), 3.80 (t, *J* = 10.3 Hz, 1H, H-6'), 3.77 (s, 3H, -OCH<sub>3</sub> of MP), 1.30 (s, 9H, -(CH<sub>3</sub>)<sub>3</sub> of Piv); <sup>13</sup>C NMR (125 MHz, CDCl<sub>3</sub>) δ 178.03, 155.43, 149.91, 137.13, 129.41, 128.44×2, 126.40×2, 118.07×2, 114.77×2, 102.40, 97.69, 79.41, 71.74, 68.79, 67.46, 64.04, 55.75, 39.22, 27.29×3; HRMS calcd. for C<sub>25</sub>H<sub>30</sub>NaO<sub>8</sub> (M+Na)<sup>+</sup> *m/z* 481.1838, found 481.1833.

#### 4-Methoxyphenyl 4,6-*O*-benzylidene-2,3-di-*O*-pivaloyl- $\alpha$ -D-mannopyranoside (**9**).

PivCl (37.0 μL, 0.301 mmol), Et<sub>3</sub>N (77.0 μL, 0.603 mmol) and DMAP (31.2 mg, 0.255 mmol) were added to a cold (0°C) solution of **8** (55.0 mg, 0.120 mmol) in CH<sub>2</sub>Cl<sub>2</sub> (3.00 mL). After stirring the reaction mixture for 80 min at 50°C, second portion of PivCl (19.0 μL, 0.154 mmol) and Et<sub>3</sub>N (30.0 μL, 0.235 mmol) were added at 0°C. After stirring the reaction mixture for 80 min at 50°C, third portion of PivCl (19.0 μL, 0.154 mmol) and Et<sub>3</sub>N (30.0 μL, 0.235 mmol) were added at 0°C. After stirring the reaction mixture for 50 min at 50°C, the

mixture was diluted with EtOAc (50 mL) and washed with saturated aq. NaHCO<sub>3</sub> (50 mL) and brine (50 mL). The organic layer was dried over Na<sub>2</sub>SO<sub>4</sub>, filtered, and concentrated *in vacuo*. The residue was purified by column chromatography on silica gel (EtOAc/hexane, 1:10, v/v) to give **9** (63.7 mg, 98%): TLC, *R<sub>f</sub>* 0.73 (EtOAc/toluene, 1:6, v/v); <sup>1</sup>H NMR (500 MHz, CDCl<sub>3</sub>) δ 7.46-7.30 (m, 5H, Ph of Bzl), 7.00 (dd, *J* = 2.3, 6.9 Hz, 2H, Ph of MP), 6.83 (dd, *J* = 2.3, 6.6 Hz, 2H, Ph of MP), 5.68 (dd, *J* = 3.4, 9.8 Hz, 1H, H-3), 5.61 (s, 1H, H of Bzl), 5.48 (dd, *J* = 1.7, 3.4 Hz, 1H, H-2), 5.34 (d, *J* = 1.7 Hz, 1H, H-1), 4.25 (dd, *J* = 4.6, 10.3 Hz, 1H, H-6), 4.16-4.07 (m, 2H, H-4, H-5), 3.83 (t, *J* = 10.3 Hz, 1H, H-6'), 3.77 (s, 3H, -OCH<sub>3</sub> of MP), 1.30 (s, 9H, -(CH<sub>3</sub>)<sub>3</sub> of Piv), 1.19 (s, 9H, -(CH<sub>3</sub>)<sub>3</sub> of Piv); <sup>13</sup>C NMR (125 MHz, CDCl<sub>3</sub>) δ 177.24, 177.03, 155.31, 149.72, 137.11, 128.89, 128.17×2, 125.88×2, 117.88×2, 114.64×2, 101.45, 97.52, 76.72, 70.02, 68.69, 68.03, 64.43, 55.64, 38.95, 38.88, 27.18×3, 27.07×3; HRMS calcd. for C<sub>30</sub>H<sub>38</sub>NaO<sub>9</sub> (M+Na)<sup>+</sup> *m/z* 565.2414, found 565.2397.

#### 4-Methoxyphenyl 4-*O*-benzyl-2,3-di-*O*-pivaloyl- $\alpha$ -D-mannopyranoside (**10**).

Compound **9** (59.9 mg, 0.110 mmol) was dissolved in CH<sub>2</sub>Cl<sub>2</sub> (2.00 mL). After stirring the reaction mixture for 20 min at -100°C, PhBCl<sub>2</sub> (46.0  $\mu$ L, 0.353 mmol) was added at -100°C. After stirring the reaction mixture for 10 min at -100 °C, Et<sub>3</sub>SiH (52.0  $\mu$ L, 0.328 mmol) was added at -100°C. After stirring the reaction mixture for 10 min at -100 °C, the mixture was diluted with EtOAc (50 mL) and washed with saturated aq. NaHCO<sub>3</sub> (50 mL) and brine (50 mL). The organic layer was dried over Na<sub>2</sub>SO<sub>4</sub>, filtered, and concentrated *in vacuo*. The residue was purified by Flash chromatography system (EtOAc/toluene, 2:98 → 24:76, v/v) to give **10** (55.3 mg, 92%): TLC, *R<sub>f</sub>* 0.34 (EtOAc/toluene, 1:6, v/v); <sup>1</sup>H NMR (500 MHz, CDCl<sub>3</sub>) δ 7.37-7.26 (m, 5H, -CH<sub>2</sub>Ph), 6.98 (dd, *J* = 2.3, 6.9 Hz, 2H, Ph of MP), 6.81 (dd, *J* = 2.3, 6.9 Hz, 2H, Ph of MP), 5.63 (dd, *J* = 2.9, 9.7 Hz, 1H, H-3), 5.42 (t, *J* = 2.9 Hz, 1H, H-2), 5.34 (d, *J* = 2.9 Hz, 1H, H-1), 4.78, 4.65 (ABq, *J* = 10.9 Hz, 2H, -CH<sub>2</sub>Ph), 4.10 (t, *J* = 9.7 Hz, 1H, H-4), 3.94-3.90 (m, 1H, H-5), 3.83-3.74 (m, 5H, H-6, H-6', -OCH<sub>3</sub> of MP), 1.28 (s, 9H, -(CH<sub>3</sub>)<sub>3</sub> of Piv), 1.21 (s, 9H, -(CH<sub>3</sub>)<sub>3</sub> of Piv); <sup>13</sup>C NMR (125 MHz, CDCl<sub>3</sub>) δ 177.43, 177.15, 155.36, 149.98, 137.72, 128.60×2, 128.05, 127.74×2, 118.06×2, 114.72×2, 96.90, 75.03, 72.58, 72.43, 71.91, 69.78, 61.59, 55.72, 39.05, 38.92, 27.28×6; HRMS calcd. for C<sub>30</sub>H<sub>40</sub>NaO<sub>9</sub> (M+Na)<sup>+</sup> *m/z* 567.2570, found 567.2556.

#### 4-Methoxyphenyl 6-*O*-benzyl-2,3-di-*O*-pivaloyl- $\alpha$ -D-mannopyranoside (**11**).

Compound **9** (247 mg, 0.455 mmol) was dissolved in CH<sub>2</sub>Cl<sub>2</sub> (5.00 mL). After stirring the reaction mixture for 10 min at -20°C, BF<sub>3</sub>•Et<sub>2</sub>O (0.100 mL, 0.910 mmol) was added at -20°C. After stirring the reaction mixture for 5 min at -20°C, Et<sub>3</sub>SiH (0.800 mL, 0.328 mmol) was added at -100°C. After stirring the reaction mixture for 4h at -100°C followed by 1h at 0°C, the mixture was diluted with EtOAc (100 mL) and washed with saturated aq. NaHCO<sub>3</sub> (100 mL) and brine (100 mL). The organic layer was dried over Na<sub>2</sub>SO<sub>4</sub>, filtered, and concentrated *in vacuo*. The residue was purified by Flash chromatography system (EtOAc/hexane, 21:79, v/v) to give **11** (222 mg, 89%): TLC, *R<sub>f</sub>* 0.44 (EtOAc/toluene, 1:6, v/v); <sup>1</sup>H NMR (500 MHz, CDCl<sub>3</sub>) δ 7.34-7.26 (m, 5H, -CH<sub>2</sub>Ph), 7.03 (dd, *J* = 2.3, 6.9 Hz, 2H, Ph of MP), 6.80 (dd, *J* = 2.3, 6.9 Hz, 2H, Ph of MP), 5.44 (dd, *J* = 2.9, 9.7 Hz, 1H, H-3), 5.35 (m, 2H, H-1, H-2), 4.62, 4.54 (ABq, *J* = 11.5 Hz, 2H, -CH<sub>2</sub>Ph), 4.13 (ddd, *J* = 4.6, 9.7, 9.7 Hz, 1H, H-4), 4.02-3.98 (m, 1H, H-5), 3.84 (dd, *J* = 4.6, 10.9 Hz, 1H, H-6), 3.79-3.75 (m, 2H, H-6', -OCH<sub>3</sub> of MP), 1.25 (s, 9H, -(CH<sub>3</sub>)<sub>3</sub> of Piv), 1.21 (s, 9H, -(CH<sub>3</sub>)<sub>3</sub> of Piv); <sup>13</sup>C NMR (125 MHz, CDCl<sub>3</sub>) δ

178.83, 177.26, 155.33, 150.15, 138.07, 128.45×2, 127.72, 127.57×2, 118.12×2, 114.69×2, 96.92, 73.63, 72.01, 71.93, 69.98, 69.63, 67.60, 55.71, 39.07, 39.03, 27.21×6; HRMS calcd. for C<sub>30</sub>H<sub>40</sub>NaO<sub>9</sub> (M+Na)<sup>+</sup> *m/z* 567.2570, found 567.2564.

**4-Methoxyphenyl *O*-(2-acetyl-3,4,6-tri-*O*-benzyl- $\alpha$ -D-mannopyranosyl)-(1→2)-*O*-3,4,6-tri-*O*-benzyl- $\alpha$ -D-mannopyranoside (12).**

AgOTf (100 mg, 0.389 mmol), Cp<sub>2</sub>HfCl<sub>2</sub> (77.6 mg, 0.204 mmol), DTBMP (6.00 mg, 0.0292 mmol) and MS AW-300 (1.25 g) were dissolved in toluene (2.00 mL). After stirring the mixture for 20 min at -20°C, the solution of **2** (128 mg, 0.259 mmol) and **5** (78.5 mg, 0.141 mmol) in toluene (2.20 mL) was added at -20°C. After stirring the reaction mixture for 70 min at 0°C, the reaction was quenched with Et<sub>3</sub>N (0.100 mL, 0.783 mmol) at -20°C. The mixture was filtered through a pad of celite. The filtrate and washings (200 mL of EtOAc) were combined and washed with saturated aq. NaHCO<sub>3</sub> (100 mL) and brine (100 mL). The organic layer was dried over Na<sub>2</sub>SO<sub>4</sub>, filtered, and concentrated *in vacuo*. The residue was purified by column chromatography on silica gel (EtOAc/hexane, 1:5, v/v) to give **12** (135 mg, 93%,  $\alpha$  only): TLC, *R<sub>f</sub>* 0.44 (EtOAc/toluene, 1:4, v/v, double development); <sup>1</sup>H NMR (500 MHz, CDCl<sub>3</sub>)  $\delta$  7.39-7.11 (m, 30H, -(CH<sub>2</sub>Ph)<sub>6</sub>), 6.95 (dd, *J* = 2.3, 6.9 Hz, 2H, Ph of MP), 6.73 (dd, *J* = 2.3, 6.9 Hz, 2H, Ph of MP), 5.57 (dd, *J* = 1.7, 3.2 Hz, 1H, H'-2), 5.54 (d, *J* = 2.3 Hz, 1H, H-1), 5.12 (d, *J* = 1.7 Hz, 1H, H'-1), 4.88, 4.59 (ABq, *J* = 10.9 Hz, 2H, -(CH<sub>2</sub>Ph)<sub>6</sub>), 4.83, 4.44 (ABq, *J* = 10.3 Hz, 2H, -(CH<sub>2</sub>Ph)<sub>6</sub>), 4.77, 4.73 (ABq, *J* = 12.0 Hz, 2H, -(CH<sub>2</sub>Ph)<sub>6</sub>), 4.77, 4.41 (ABq, *J* = 10.9 Hz, 2H, -(CH<sub>2</sub>Ph)<sub>6</sub>), 4.62, 4.45 (ABq, *J* = 12.0 Hz, 2H, -(CH<sub>2</sub>Ph)<sub>6</sub>), 4.60, 4.46 (ABq, *J* = 12.6 Hz, 2H, -(CH<sub>2</sub>Ph)<sub>6</sub>), 4.18 (dd, *J* = 2.3, 2.9 Hz, 1H, H-2), 4.11 (dd, *J* = 2.9, 9.2 Hz, 1H, H-3), 4.01-3.94 (m, 3H, H'-3, H'-5, H-4), 3.91-3.87 (m, 1H, H-5), 3.81 (t, *J* = 9.7 Hz, 1H, H'-4), 3.76 (dd, *J* = 6.3, 11.7 Hz, 1H, H-6), 3.74-3.71 (m, 4H, H'-6, -OCH<sub>3</sub> of MP), 3.69-3.66 (m, 2H, H'-6', H-6'), 2.13 (s, 3H, -CH<sub>3</sub> of Ac); <sup>13</sup>C NMR (125 MHz, CDCl<sub>3</sub>)  $\delta$  177.25, 154.97, 150.11, 138.54, 138.44×2, 138.39, 138.17, 138.06, 128.53×2, 128.44×4, 128.40×2, 128.38×2, 128.34×2, 128.27×2, 128.11×2, 127.92×2, 127.83×2, 127.78, 127.75, 127.70, 127.64×3, 127.59×4, 127.46, 117.86×2, 114.59×2, 99.72, 97.72, 79.53, 78.25, 75.29, 75.20, 74.71, 74.55, 74.42, 73.42, 73.28, 72.39, 72.32, 72.05, 69.16, 68.99, 68.77, 55.69, 21.25; HRMS calcd. for C<sub>90</sub>H<sub>94</sub>NaO<sub>18</sub> (M+Na)<sup>+</sup> *m/z* 1053.439,6 found 1053.4397.

**4-Methoxyphenyl *O*-(3,4,6-tri-*O*-benzyl- $\alpha$ -D-mannopyranosyl)-(1→2)-*O*-3,4,6-tri-*O*-benzyl- $\alpha$ -D-mannopyranoside (13).**

NaOMe (28% in MeOH; 0.135 mL, 0.701 mmol) was added to a cold (0°C) solution of **12** (135 mg, 0.131 mmol) in MeOH/THF (1:1, v/v, 2.70 mL). After stirring the reaction mixture for 20 min at room temperature, the reaction mixture was neutralized with Amberlyst 15E at 0°C. The mixture was filtered and concentrated *in vacuo*, before the residue was purified by column chromatography on silica gel (EtOAc/toluene, 1:10, v/v) to give **13** (115 mg, 89%). Physical data were consistent with those reported previously<sup>(5)</sup>: TLC, *R<sub>f</sub>* 0.24 (EtOAc/hexane, 1:2, v/v); <sup>1</sup>H NMR (500 MHz, CDCl<sub>3</sub>)  $\delta$  7.38-7.13 (m, 30H, -(CH<sub>2</sub>Ph)<sub>6</sub>), 6.96 (dd, *J* = 2.3, 6.9 Hz, 2H, Ph of MP), 6.72 (dd, *J* = 2.3, 6.3 Hz, 2H, Ph of MP), 5.60 (d, *J* = 1.7 Hz, 1H, H-1), 5.19 (d, *J* = 1.7 Hz, 1H, H'-1), 4.88, 4.59 (ABq, *J* = 10.9 Hz, 2H, -(CH<sub>2</sub>Ph)<sub>6</sub>), 4.80, 4.49 (ABq, *J* = 10.9 Hz, 2H, -(CH<sub>2</sub>Ph)<sub>6</sub>), 4.76, 4.73 (ABq, *J* = 12.0 Hz, 2H, -(CH<sub>2</sub>Ph)<sub>6</sub>), 4.66, 4.46 (ABq, *J* = 12.0 Hz, 2H, -(CH<sub>2</sub>Ph)<sub>6</sub>), 4.57, 4.48 (ABq,

$J = 12.0$  Hz, 2H,  $-(\text{CH}_2\text{Ph})_6$ ), 4.54, 4.54 (ABq,  $J = 11.5$  Hz, 2H,  $-(\text{CH}_2\text{Ph})_6$ ), 4.22 (m, 1H, H-2), 4.16 (dd,  $J = 1.7, 2.9$  Hz, 1H, H'-2), 4.13 (dd,  $J = 2.9, 9.7$  Hz, 1H, H-3), 4.01-3.97 (m, 1H, H'-5), 3.97 (t,  $J = 9.7$  Hz, 1H, H-4), 3.90-3.87 (m, 2H, H'-3, H-5), 3.82 (dd,  $J = 3.4, 10.9$  Hz, 1H, H-6), 3.79 (t,  $J = 9.2$  Hz, 1H, H'-4), 3.72 (s, 3H,  $-\text{OCH}_3$  of MP) 3.71-3.66 (m, 3H, H'-6, H'-6', H-6').

**4-Methoxyphenyl *O*-(2-*O*-acetyl-3,4,6-tri-*O*-benzyl- $\alpha$ -D-mannopyranosyl-(1 $\rightarrow$ 2)-*O*-3,4,6-tri-*O*-benzyl- $\alpha$ -D-mannopyranosyl)-(1 $\rightarrow$ 2)-3,4,6-tri-*O*-benzyl- $\alpha$ -D-mannopyranoside (14).**

AgOTf (8.20 mg, 0.0319 mmol),  $\text{Cp}_2\text{HfCl}_2$  (6.00 mg, 0.0158 mmol), and MS AW-300 (340 mg) were dissolved in toluene (0.500 mL). After stirring the mixture for 10 min at room temperature and for 10 min at  $-20^\circ\text{C}$ , the solution of **2** (10.6 mg, 0.0214 mmol) and **13** (11.0 mg, 0.0111 mmol) in toluene (0.6 mL) was added at  $-20^\circ\text{C}$ . After stirring the reaction mixture for 80 min at gradually heated from  $-20$  to  $0^\circ\text{C}$ , the reaction was quenched with  $\text{Et}_3\text{N}$  (5.00  $\mu\text{L}$ , 0.0359 mmol) at  $-20^\circ\text{C}$ . The mixture was filtered through a pad of celite. The filtrate and washings (200 mL of EtOAc) were combined and washed with saturated aq.  $\text{NaHCO}_3$  (200 mL) and brine (200 mL). The organic layer was dried over  $\text{Na}_2\text{SO}_4$ , filtered, and concentrated *in vacuo*. The residue was purified by Flash Chromatography System (UltraPack B, EtOAc/hexane, 12:88 $\rightarrow$ 26:74 $\rightarrow$ 51:49, v/v) to give **14** (16.1 mg, 99%,  $\alpha:\beta = 99:1$ ): TLC,  $R_f$  0.42 (EtOAc/hexane, 1:3, v/v, double development);  $^1\text{H}$  NMR (500 MHz,  $\text{CDCl}_3$ )  $\delta$  7.34-7.12 (m, 45H,  $-(\text{CH}_2\text{Ph})_9$ ), 6.95 (dd,  $J = 2.3, 6.6$  Hz, 2H, Ph of MP), 6.71 (dd,  $J = 2.3, 6.9$  Hz, 2H, Ph of MP), 5.60 (d,  $J = 2.3$  Hz, 1H, H-1), 5.53 (dd,  $J = 1.7, 3.4$  Hz, 1H, H''-2), 5.23 (d,  $J = 1.7$  Hz, 1H, H'-1), 5.05 (d,  $J = 2.3$  Hz, 1H, H''-1), 4.86-4.30 (m, 18H,  $-(\text{CH}_2\text{Ph})_9$ ), 4.14 (t,  $J = 2.3$  Hz, 1H, H-2), 4.11 (t,  $J = 2.5$  Hz, 1H, H'-2), 4.05 (dd,  $J = 2.9, 8.6$  Hz, 1H, H-3), 4.00-3.96 (m, 2H, H''-3, H'-5), 3.94-3.84 (m, 5H, H'-3, H-5, H-4, H''-4, H''-5), 3.80-3.75 (m, 2H, H''-6, H'-4), 3.72 (s, 3H,  $-\text{OCH}_3$  of MP), 3.70-3.64 (m, 4H, H'-6, H-6, H''-6', H'-6'), 3.54 (dd,  $J = 1.2, 10.6$  Hz, 1H, H-6'), 2.13 (s, 3H,  $-\text{CH}_3$  of Ac);  $^{13}\text{C}$  NMR (125 MHz,  $\text{CDCl}_3$ )  $\delta$  170.15, 154.82, 150.05, 138.54, 138.40, 138.35, 138.33, 138.31, 138.15, 138.01, 128.45 $\times$ 2, 128.33 $\times$ 5, 128.29 $\times$ 8, 128.24 $\times$ 5, 128.18 $\times$ 2, 128.00 $\times$ 2, 127.93 $\times$ 2, 127.83 $\times$ 2, 127.79 $\times$ 3, 127.76 $\times$ 2, 127.65, 127.57, 127.55, 127.49 $\times$ 4, 127.45 $\times$ 3, 127.38, 127.34, 117.78 $\times$ 2, 114.57 $\times$ 2, 114.47, 99.43, 97.60, 79.22, 78.08, 75.16, 75.11 $\times$ 2, 74.99, 74.95, 74.75, 74.65, 74.25, 73.36 $\times$ 2, 73.20 $\times$ 2, 73.16 $\times$ 2, 72.34, 72.30, 72.15, 72.02, 71.87 $\times$ 2, 69.39, 69.16, 68.84, 68.71, 55.60, 21.19; HRMS calcd. for  $\text{C}_{90}\text{H}_{94}\text{NaO}_{18}$  ( $\text{M}+\text{Na}$ ) $^+$   $m/z$  1485.6338, found 1485.6345.

**4-Methoxyphenyl *O*-(3,4,6-tri-*O*-benzyl- $\alpha$ -D-mannopyranosyl-(1 $\rightarrow$ 2)-*O*-3,4,6-tri-*O*-benzyl- $\alpha$ -D-mannopyranosyl)-(1 $\rightarrow$ 2)-3,4,6-tri-*O*-benzyl- $\alpha$ -D-mannopyranoside (15).**

$\text{NaOMe}$  (28% in MeOH; 50.0  $\mu\text{L}$ , 0.260 mmol) was added to a cold ( $0^\circ\text{C}$ ) solution of **14** (42.9 mg, 0.0293 mmol) in MeOH/THF (1:1, v/v, 1.00 mL). After stirring the reaction mixture for 60 min at room temperature, the reaction mixture was neutralized with Amberlyst 15E at  $0^\circ\text{C}$ . The mixture was filtered and concentrated *in vacuo*, before the residue was purified by column chromatography on silica gel (EtOAc/toluene, 1:2, v/v) to give **15** (39.8 mg, 97%): TLC,  $R_f$  0.49 (EtOAc/toluene, 1:6, v/v);  $^1\text{H}$  NMR (500 MHz,  $\text{CDCl}_3$ )  $\delta$  7.35-7.14 (m, 45H,  $-(\text{CH}_2\text{Ph})_9$ ), 6.96 (dd,  $J = 2.3, 6.9$  Hz, 2H, Ph of MP), 6.71 (dd,  $J = 2.3, 5.7$  Hz, 2H, Ph of MP), 5.62 (d,  $J = 1.7$  Hz, 1H, H-1), 5.27 (d,  $J = 1.7$  Hz, 1H, H'-1), 5.12 (d,  $J = 1.2$  Hz, 1H, H''-1), 4.85-4.32 (m, 18H,  $-(\text{CH}_2\text{Ph})_9$ ), 4.13 (m, 3H, H-2, H'-2, H''-2), 4.05 (dd,  $J = 2.9, 8.6$  Hz, 1H, H-3), 4.01-3.97 (m, 1H, H''-5), 3.93 (dd,  $J = 2.9, 8.6$  Hz, 1H, H'-3), 3.92-3.84 (m, 5H, H-4, H''-3, H'-5, H''-6), 3.78 (dd,  $J = 4.0, 11.5$  Hz, 1H, H'-

4), 3.76 (t,  $J = 9.2$  Hz, 1H, H''-4) 3.94-3.84 (m, 5H, H'-3, H-5, H-4, H''-4, H''-5), 3.80-3.75 (m, 2H, H''-6, H'-4), 3.72 (s, 3H, -OCH<sub>3</sub> of MP), 3.72-3.63 (m, 4H, H'-6, H-6, H''-6', H'-6'), 3.57 (dd,  $J = 1.2, 10.9$  Hz, 1H, H-6'); <sup>13</sup>C NMR (125 MHz, CDCl<sub>3</sub>)  $\delta$  154.90, 150.17, 138.63, 138.54 $\times$ 2, 138.51 $\times$ 2, 138.39 $\times$ 2, 138.26, 138.12, 138.01, 128.60 $\times$ 2, 128.57 $\times$ 2, 128.49 $\times$ 2, 128.45 $\times$ 2, 128.41 $\times$ 6, 128.39 $\times$ 6, 128.33 $\times$ 2, 128.04 $\times$ 2, 127.99 $\times$ 8, 127.95, 127.90 $\times$ 2, 127.81 $\times$ 2, 127.73, 127.68, 127.63, 127.54 $\times$ 5, 127.46, 127.42, 117.88 $\times$ 2, 114.58 $\times$ 2, 101.13, 101.03, 97.69, 80.03, 79.24, 75.38, 75.26, 75.15, 75.10, 75.03, 74.72, 74.41, 73.45, 73.26 $\times$ 2, 72.46, 72.36, 72.21, 72.03, 71.66, 69.54, 69.27, 69.12, 69.64, 55.69; HRMS calcd. for C<sub>88</sub>H<sub>92</sub>NaO<sub>17</sub> (M+Na)<sup>+</sup>  $m/z$  1443.6232, found 1443.6235.

**4-Methoxyphenyl *O*-( $\alpha$ -D-mannopyranosyl-(1 $\rightarrow$ 2)-*O*- $\alpha$ -D-mannopyranosyl)-(1 $\rightarrow$ 2)- $\alpha$ -D-mannopyranoside (16) = (A3).**

Pd(OH)<sub>2</sub> (20% on carbon, 94.2 mg) was added to a solution of **15** (39.8 mg, 0.0280 mmol) in MeOH/THF (2:1, v/v, 2.00 mL). After stirring the reaction mixture under H<sub>2</sub> atmosphere for 17.5 h at room temperature, the mixture was filtered through a pad of celite. The filtrate and washings were concentrated *in vacuo*. The residue was purified by gel filtration chromatography on Sephadex G-10 (3 cm $\Phi$   $\times$  80 cm) (20% EtOH) to give **16** (17.8 mg, quant.): TLC,  $R_f$  0.68 (H<sub>2</sub>O/2-PrOH, 1:2, v/v); <sup>1</sup>H NMR (500 MHz, D<sub>2</sub>O)  $\delta$  7.11 (dd,  $J = 2.3, 6.3$  Hz, 2H, Ph of MP), 6.96 (dd,  $J = 2.3, 6.9$  Hz, 2H, Ph of MP), 5.75 (d,  $J = 1.2$  Hz, 1H, H-1), 5.34 (d,  $J = 1.2$  Hz, 1H, H'-1), 5.05 (d,  $J = 1.7$  Hz, 1H, H''-1), 4.15 (dd,  $J = 1.7, 3.4$  Hz, 1H, H-2), 4.13-4.10 (m, 2H, H'-2, H-3), 4.06 (dd,  $J = 1.7, 3.4$  Hz, 1H, H''-2), 3.96 (dd,  $J = 3.4, 9.4$  Hz, 1H, H'-3), 3.89 (t,  $J = 1.7$  Hz, 1H, H'-6), 3.87 (t,  $J = 1.7$  Hz, 1H, H'-6'), 3.84-3.81 (m, 2H, H''-3, H-6), 3.79-3.68 (m, 8H, H-5'', -OCH<sub>3</sub> of MP, H-4, H''-6, H-6', H''-6', H-5, H'-5), 3.64 (t,  $J = 9.4$  Hz, H'-4) 3.60 (t,  $J = 9.7$  Hz, H''-4); <sup>13</sup>C NMR (125 MHz, D<sub>2</sub>O)  $\delta$  154.70, 149.70, 118.93 $\times$ 2, 115.03 $\times$ 2, 102.30, 100.85, 97.83, 79.24, 78.68, 73.40, 73.38, 73.29, 70.34, 69.98 $\times$ 2, 69.95, 67.18, 66.90, 66.82, 61.23, 61.17, 60.70, 55.80; HRMS calcd. for C<sub>25</sub>H<sub>38</sub>NaO<sub>17</sub> (M+Na)<sup>+</sup>  $m/z$  633.2007, found 633.1993.

**4-Methoxyphenyl 2-*O*-pivaroyl-(2-*O*-acetyl-3,4,6-tri-*O*-benzyl- $\alpha$ -D-mannopyranosyl)-(1 $\rightarrow$ 3)-*O*-4,6-benzylidene- $\alpha$ -D-mannopyranoside (17).**

AgOTf (40.4 mg, 0.157 mmol), Cp<sub>2</sub>HfCl<sub>2</sub> (29.9 mg, 0.0788 mmol), DTBMP (3.00 mg, 0.0146 mmol) and MS AW-300 (901 mg) were dissolved in toluene (1.25 mL). After stirring the mixture for 10 min at room temperature and for 20 min at -40°C, the solution of **2** (45.0 mg, 0.0910 mmol) and **8** (27.3 mg, 0.0595 mmol) in CH<sub>2</sub>Cl<sub>2</sub>/toluene (2.5:1, v/v, 1.75 mL) was added at -40°C. After stirring the reaction mixture for 70 min at -40°C, the reaction was quenched with Et<sub>3</sub>N (0.100 mL, 0.783 mmol) at -40°C. The mixture was filtered through a pad of celite. The filtrate and washings (200 mL of EtOAc) were combined and washed with saturated aq. NaHCO<sub>3</sub> (200 mL) and brine (200 mL). The organic layer was dried over Na<sub>2</sub>SO<sub>4</sub>, filtered, and concentrated *in vacuo*. The residue was purified by Flash Chromatography System (EtOAc/hexane, 8:92 $\rightarrow$ 20:80, v/v) to give **17** (55.1 mg, 99%,  $\alpha$  only): TLC,  $R_f$  0.67 (EtOAc/toluene, 1:4, v/v, triple development); <sup>1</sup>H NMR (500 MHz, CDCl<sub>3</sub>)  $\delta$  7.47-7.14 (m, 20H, Ph of Bzl, -(CH<sub>2</sub>Ph)<sub>3</sub>), 6.93 (dd,  $J = 2.3, 6.6$  Hz, 2H, Ph of MP), 6.80 (dd,  $J = 2.3, 6.6$  Hz, 2H, Ph of MP), 5.64 (s, 1H, H of Bzl), 5.52 (dd,  $J = 1.7, 2.9$  Hz, 1H, H'-2), 5.36 (dd,  $J = 1.7, 3.4$  Hz, 1H, H-2), 5.33 (d,  $J = 1.7$  Hz, 1H, H-1), 5.31 (d,  $J = 1.7$  Hz, 1H, H'-1), 4.85, 4.49 (ABq,  $J = 10.9$  Hz,

2H,  $-(\text{CH}_2\text{Ph})_3$ ), 4.71, 4.49 (ABq,  $J = 12.0$  Hz, 2H,  $-(\text{CH}_2\text{Ph})_3$ ), 4.66, 4.44 (ABq,  $J = 11.5$  Hz, 2H,  $-(\text{CH}_2\text{Ph})_3$ ), 4.53 (dd,  $J = 3.4, 9.2$  Hz, 1H, H-3), 4.23 (dd,  $J = 4.6, 10.6$  Hz, 1H, H-6), 4.07 (t,  $J = 9.2$  Hz, 1H, H-4), 4.05-4.01 (m, 1H, H-5), 3.90-3.85 (m, 3H, H'-3, H'-6, H'-4), 3.84-3.78 (m, 2H, H-6', H'-5), 3.76 (s, 3H,  $-\text{OCH}_3$  of MP), 4.53 (dd,  $J = 1.2, 10.8$  Hz, 1H, H'-6'), 2.10 (s, 3H,  $-\text{CH}_3$  of Ac), 1.24 (s, 9H,  $-(\text{CH}_3)_3$  of Piv);  $^{13}\text{C}$  NMR (125 MHz,  $\text{CDCl}_3$ )  $\delta$  177.43, 170.30, 155.44, 149.70, 138.76, 138.37, 138.02, 137.16, 129.01, 128.46 $\times 2$ , 128.38 $\times 2$ , 128.29 $\times 2$ , 128.25 $\times 2$ , 128.00 $\times 2$ , 127.89 $\times 2$ , 127.76, 127.65 $\times 2$ , 127.59, 127.48, 126.11 $\times 2$ , 118.16 $\times 2$ , 114.72 $\times 2$ , 101.54, 99.19, 97.61, 79.28, 78.18, 74.83, 74.17, 73.50, 72.07, 71.81, 71.40, 71.30, 68.80, 68.71, 68.48, 64.20, 55.74, 39.11, 27.27 $\times 3$ , 21.19; HRMS calcd. for  $\text{C}_{54}\text{H}_{60}\text{NaO}_{14}$  ( $\text{M}+\text{Na}$ ) $^+$   $m/z$  955.3881, found 955.3879.

**4-Methoxyphenyl 2-O-pivaroyl-(3,4,6-tri-O-benzyl- $\alpha$ -D-mannopyranosyl)-(1 $\rightarrow$ 3)-O-4,6-benzylidene- $\alpha$ -D-mannopyranoside (18).**

$\text{H}_2\text{O}_2$  (35% in water, 58.0  $\mu\text{L}$ , 0.600 mmol) and  $\text{LiOH}\cdot\text{H}_2\text{O}$  (2.70 mg, 0.0643 mmol) were added to a cold ( $0^\circ\text{C}$ ) solution of **17** (14.1 mg, 0.151 mmol) in THF (2.00 mL). After stirring the reaction mixture for 2 h at room temperature, second portion of  $\text{H}_2\text{O}_2$  (35% in water, 58.0  $\mu\text{L}$ , 0.600 mmol) was added at  $0^\circ\text{C}$ . After stirring the reaction mixture for 26 h at room temperature, the mixture was diluted with EtOAc (50 mL) and washed with saturated aq.  $\text{NaHCO}_3$  (50 mL) and brine (50 mL). The organic layer was dried over  $\text{Na}_2\text{SO}_4$ , filtered, and concentrated *in vacuo*. The residue was purified by column chromatography on silica gel (EtOAc/hexane, 1:3, v/v) to give **18** (10.4 mg, 78%): TLC,  $R_f$  0.56 (EtOAc/hexane, 1:1, v/v);  $^1\text{H}$  NMR (500 MHz,  $\text{CDCl}_3$ )  $\delta$  7.47-7.18 (m, 20H, Ph of Bzl,  $-(\text{CH}_2\text{Ph})_3$ ), 6.93 (dd,  $J = 2.3, 6.9$  Hz, 2H, Ph of MP), 6.80 (dd,  $J = 2.3, 6.9$  Hz, 2H, Ph of MP), 5.61 (s, 1H, H of Bzl), 5.37 (dd,  $J = 1.7, 3.4$  Hz, 1H, H-2), 5.33 (d,  $J = 1.7$  Hz, 1H, H-1), 5.31 (d,  $J = 1.7$  Hz, 1H, H'-1), 4.81, 4.51 (ABq,  $J = 11.5$  Hz, 2H,  $-(\text{CH}_2\text{Ph})_3$ ), 4.68, 4.50 (ABq,  $J = 12.0$  Hz, 2H,  $-(\text{CH}_2\text{Ph})_3$ ), 4.63, 4.60 (ABq,  $J = 11.5$  Hz, 2H,  $-(\text{CH}_2\text{Ph})_3$ ), 4.55 (dd,  $J = 3.4, 9.5$  Hz, 1H, H-3), 4.21 (dd,  $J = 4.6, 8.0$  Hz, 1H, H-6), 4.08-4.03 (m, 2H, H'-2, H-5), 4.02 (t,  $J = 9.5$  Hz, 1H, H-4), 3.89 (t,  $J = 9.7$  Hz, 1H, H'-4), 3.80 (dd,  $J = 2.3, 4.6$  Hz, 1H, H-6'), 3.79-3.71 (m, 7H, H-3',  $-\text{OCH}_3$  of MP, H-5', H'-6, H'-6'), 1.24 (s, 9H,  $-(\text{CH}_3)_3$  of Piv);  $^{13}\text{C}$  NMR (125 MHz,  $\text{CDCl}_3$ )  $\delta$  177.43, 155.39, 149.74, 138.74, 138.35, 137.97, 137.24, 129.17, 128.57 $\times 2$ , 128.42 $\times 2$ , 128.37 $\times 2$ , 128.29 $\times 2$ , 127.96 $\times 3$ , 127.78 $\times 2$ , 127.61 $\times 2$ , 127.57, 127.48, 126.14 $\times 2$ , 118.09 $\times 2$ , 114.71 $\times 2$ , 101.86, 100.90, 97.50, 79.94, 79.13, 74.71, 74.10, 73.51, 72.02, 71.87, 71.76, 71.60, 68.80, 68.74, 68.40, 64.23, 55.74, 39.10, 27.26 $\times 3$ ; HRMS calcd. for  $\text{C}_{52}\text{H}_{58}\text{NaO}_{13}$  ( $\text{M}+\text{Na}$ ) $^+$   $m/z$  913.3775, found 913.3773.

**4-Methoxyphenyl O-(2-O-acetyl-3,4,6-tri-O-benzyl- $\alpha$ -D-mannopyranosyl)-(1 $\rightarrow$ 2)-O-3,4,6-tri-O-benzyl- $\alpha$ -D-mannopyranosyl)-(1 $\rightarrow$ 3)-O-2-O-pivaroyl-4,6-benzylidene- $\alpha$ -D-mannopyranoside (19).**

$\text{AgOTf}$  (9.60 mg, 0.0374 mmol),  $\text{Cp}_2\text{HfCl}_2$  (7.10 mg, 0.0187 mmol) and MS AW-300 (360 mg) were dissolved in  $\text{CH}_2\text{Cl}_2$ /toluene (1:1, v/v, 0.600 mL). After stirring the mixture for 10 min at room temperature and for 20 min at  $-20^\circ\text{C}$ , the solution of **2** (11.7 mg, 0.0237 mmol) and **18** (10.5 mg, 0.0118 mmol) in  $\text{CH}_2\text{Cl}_2$ /toluene (1:1, v/v, 0.600 mL) was added at  $-20^\circ\text{C}$ . After stirring the reaction mixture for 50 min at  $0^\circ\text{C}$ , the reaction was quenched with  $\text{Et}_3\text{N}$  (10.0  $\mu\text{L}$ , 0.0718 mmol) at  $-20^\circ\text{C}$ . The mixture was filtered through a pad of celite. The filtrate and washings (200 mL of EtOAc) were combined and washed with saturated aq.  $\text{NaHCO}_3$  (200 mL)

and brine (200 mL). The organic layer was dried over Na<sub>2</sub>SO<sub>4</sub>, filtered, and concentrated *in vacuo*. The residue was purified by Flash Chromatography System (UltraPack B, EtOAc/hexane, 15:85→30:70→50:50, v/v) to give **19** (16.2 mg, quant.,  $\alpha/\beta=99:1$ ): TLC, *R<sub>f</sub>* 0.43 (EtOAc/toluene, 1:3, v/v, triple development); <sup>1</sup>H NMR (500 MHz, CDCl<sub>3</sub>)  $\delta$  7.43-7.09 (m, 35H, Ph of Bzl, -(CH<sub>2</sub>Ph)<sub>6</sub>), 6.90 (dd, *J* = 2.3, 6.9 Hz, 2H, Ph of MP), 6.78 (dd, *J* = 2.3, 6.9 Hz, 2H, Ph of MP), 5.51 (m, 2H, H of Bzl, H''-2), 5.37 (dd, *J* = 1.7, 3.4 Hz, 1H, H-2), 5.33 (d, *J* = 1.7 Hz, 1H, H-1), 5.27 (d, *J* = 2.3 Hz, 1H, H'-1), 5.11 (d, *J* = 1.7 Hz, 1H, H''-1), 4.83, 4.38 (ABq, *J* = 10.9 Hz, 4H, -(CH<sub>2</sub>Ph)<sub>9</sub>), 4.69-4.49 (m, 6H, -(CH<sub>2</sub>Ph)<sub>9</sub>), 4.53 (dd, *J* = 3.4, 9.7 Hz, 1H, H-3), 4.47, 4.24 (ABq, *J* = 12.0 Hz, 2H, -(CH<sub>2</sub>Ph)<sub>9</sub>), 4.17 (dd, *J* = 3.4, 10.0 Hz, 1H, H-6), 4.11 (t, *J* = 2.3 Hz, 1H, H'-2), 4.03-3.98 (m, 2H, H-4, H-6'), 3.96 (dd, *J* = 3.4, 9.5 Hz, 1H, H''-3), 3.91-3.86 (m, 2H, H''-4, H'-4), 3.81 (dd, *J* = 2.3, 9.2 Hz, 1H, H'-3), 3.80-3.67 (m, 8H, H'-6, H-5, -OCH<sub>3</sub> of MP, H'-6', H'-5, H''-5), 3.70-3.64 (m, 4H, H'-6, H-6, H''-6', H'-6'), 3.40 (dd, *J* = 3.4, 10.9 Hz, 1H, H''-6), 3.21 (dd, *J* = 1.2, 10.9 Hz, 1H, H''-6'), 2.08 (s, 3H, -CH<sub>3</sub> of Ac), 1.26 (s, 9H, -(CH<sub>3</sub>)<sub>3</sub> of Piv); <sup>13</sup>C NMR (125 MHz, CDCl<sub>3</sub>)  $\delta$  177.32, 170.01, 155.27, 149.64, 138.69, 138.65, 138.47, 138.44, 138.27, 138.02, 137.20, 128.98, 128.35×2, 128.30×2, 128.27×2, 128.24×2, 128.18×8, 128.15×2, 127.75×2, 127.63×4, 127.54×2, 127.50×2, 127.46, 127.39, 127.35, 127.32×2, 127.03×2, 126.02×2, 118.02×2, 101.73, 100.25, 99.08, 97.42, 79.62, 78.91, 78.14, 75.00, 74.54, 74.24, 73.99, 73.66, 73.29, 73.08, 71.97, 71.90, 71.52, 71.40, 69.06, 68.67, 68.58, 68.23, 64.13, 55.63, 38.99, 38.94, 27.18×3, 21.12; HRMS calcd. for C<sub>81</sub>H<sub>88</sub>NaO<sub>19</sub> (M+Na)<sup>+</sup> *m/z* 1387.5818, found 1387.5825.

**4-Methoxyphenyl *O*-(3,4,6-tri-*O*-benzyl- $\alpha$ -D-mannopyranosyl-(1→2)-*O*-3,4,6-tri-*O*-benzyl- $\alpha$ -D-mannopyranosyl)-(1→3)-*O*-4,6-benzylidene- $\alpha$ -D-mannopyranoside (**20**).**

NaOMe (28% in MeOH; 100.0  $\mu$ L, 0.520 mmol) was added to a cold (0°C) solution of **19** (41.3 mg, 0.0302 mmol) in MeOH/THF (1:1, v/v, 1.00 mL). After stirring the reaction mixture for 17 h at room temperature, the reaction mixture was neutralized with Amberlyst 15E at 0°C. The mixture was filtered and concentrated *in vacuo*, before the residue was purified by Flash Chromatography System (UltraPack B, EtOAc/toluene, 14:86→44:56, v/v) to give **20** (29.0 mg, 77%): TLC, *R<sub>f</sub>* 0.31 (EtOAc/toluene, 1:4, v/v); <sup>1</sup>H NMR (500 MHz, CDCl<sub>3</sub>)  $\delta$  7.46-7.12 (m, 42H, Ph of Bzl, -(CH<sub>2</sub>Ph)<sub>6</sub>), 6.84 (dd, *J* = 2.2, 7.0 Hz, 2H, Ph of MP), 6.77 (dd, *J* = 2.3, 6.6 Hz, 2H, Ph of MP), 5.51 (s, 1H, H of Bzl), 4.79-4.43 (m, 12H, -(CH<sub>2</sub>Ph)<sub>9</sub>), 4.29-4.24 (m, 2H, H'-2, H-3), 4.15-4.06 (m, 5H, H'-5, H-4, H-2, H''-4, H''-2), 4.01-3.97 (m, 1H, H''-5), 3.94 (dd, *J* = 2.9, 8.0 Hz, 1H, H'-4), 3.92-3.87 (m, 2H, H-5, H'-3), 3.83-3.70 (m, 7H, H''-3, H-6, -OCH<sub>3</sub> of MP, H''-6, H-6'), 3.60-3.53 (m, 3H, H'-6, H'-6', H''-6'); <sup>13</sup>C NMR (125 MHz, CDCl<sub>3</sub>)  $\delta$  154.90, 149.87, 138.19, 138.15, 138.00×2, 137.95, 137.62, 137.56, 129.01, 128.87, 128.46×4, 128.40×4, 128.38×3, 128.34×2, 128.24×2, 128.08×2, 127.91×2, 127.86×8, 127.77×8, 127.53, 126.13×2, 117.62×2, 114.50×2, 101.57, 99.53, 99.31, 79.90, 75.26, 75.21, 74.90, 74.42, 73.56, 73.33, 72.42, 71.95, 71.92, 71.50, 69.84, 69.76, 68.86, 68.66, 68.36, 64.29, 55.62; HRMS calcd. for C<sub>74</sub>H<sub>78</sub>NaO<sub>17</sub> (M+Na)<sup>+</sup> *m/z* 1261.5137, found 1261.5127.

**4-Methoxyphenyl *O*-( $\alpha$ -D-mannopyranosyl-(1→2)-*O*- $\alpha$ -D-mannopyranosyl)-(1→3)-*O*- $\alpha$ -D-mannopyranoside (**21**) = (**B3**).**

Pd(OH)<sub>2</sub> (20% on carbon, 94.2 mg) was added to a solution of **20** (28.7 mg, 0.0232 mmol) in MeOH/THF (1:1, v/v, 1.00 mL). After stirring the reaction mixture under H<sub>2</sub> atmosphere for 4 h at room temperature, the mixture

was filtered through a pad of celite. The filtrate and washings were concentrated *in vacuo*. The residue was purified by gel filtration chromatography on Sephadex LH-20 (3 cm  $\Phi$   $\times$  80 cm) (20% EtOH) to give **21** (12.0 mg, 85%): TLC,  $R_f$  0.63 (H<sub>2</sub>O/2-PrOH, 1:3, v/v); <sup>1</sup>H NMR (500 MHz, D<sub>2</sub>O)  $\delta$  7.10 (dd,  $J$  = 2.3, 4.6 Hz, 2H, Ph of MP), 6.96 (dd,  $J$  = 2.3, 6.9 Hz, 2H, Ph of MP), 5.46 (d,  $J$  = 2.3 Hz, 1H, H'-1), 5.42 (d,  $J$  = 1.2 Hz, 1H, H''-1), 5.05 (d,  $J$  = 1.7 Hz, 1H, H-1), 4.29 (dd,  $J$  = 2.3, 3.4 Hz, 1H, H'-2), 4.11 (dd,  $J$  = 1.7, 3.4 Hz, 1H, H''-2), 4.10 (dd,  $J$  = 3.4, 9.5 Hz, 1H, H'-3), 4.06 (dd,  $J$  = 1.7, 3.4 Hz, 1H, H-2), 4.00 (dd,  $J$  = 3.4, 9.7 Hz, 1H, H''-3), 3.90-3.83 (m, 4H, H'-6, H'-4, H-5, H-3), 3.80-3.72 (m, 9H, H'-6', -OCH<sub>3</sub> of MP, H-6, H'-5, H''-6, H''-6', H-6'), 3.70 (t,  $J$  = 9.4 Hz, 1H, H''-4), 3.70 (t,  $J$  = 9.7 Hz, 1H, H-4); <sup>13</sup>C NMR (125 MHz, D<sub>2</sub>O)  $\delta$  154.66, 149.59, 118.71 $\times$ 2, 115.09 $\times$ 2, 102.36, 100.82, 99.06, 78.53, 78.24, 73.56, 73.46, 73.28, 70.36, 69.99, 69.57, 66.97, 66.76, 65.97, 61.01, 60.96, 60.58, 55.82; HRMS calcd. for C<sub>25</sub>H<sub>38</sub>NaO<sub>17</sub> (M+Na)<sup>+</sup>  $m/z$  633.2007, found 633.2008.

**4-Methoxyphenyl 2,3-di-*O*-pivaroyl-(2-*O*-acetyl-3,4,6-tri-*O*-benzyl- $\alpha$ -D-mannopyranosyl)-(1 $\rightarrow$ 6)-*O*-4-benzyl- $\alpha$ -D-mannopyranoside (22).**

AgOTf (49.3 mg, 0.192 mmol), Cp<sub>2</sub>HfCl<sub>2</sub> (36.8 mg, 0.0969 mmol), DTBMP (4.70 mg, 0.0229 mmol) and MS AW-300 (606 mg) were dissolved in toluene (1.00 mL). After stirring the mixture for 10 min at room temperature and for 15 min at -20°C, the solution of **2** (58.0 mg, 0.0117 mmol) and **10** (50.5 mg, 0.0927 mmol) in toluene (1.00 mL) was added at -20°C. After stirring the reaction mixture for 90 min at 0°C, the reaction was quenched with Et<sub>3</sub>N (28.0  $\mu$ L, 0.201 mmol) at 0°C. The mixture was filtered through a pad of celite. The filtrate and washings (200 mL of EtOAc) were combined and washed with saturated aq. NaHCO<sub>3</sub> (200 mL) and brine (200 mL). The organic layer was dried over Na<sub>2</sub>SO<sub>4</sub>, filtered, and concentrated *in vacuo*. The residue was purified by column chromatography on silica gel (EtOAc/hexane, 1:3, v/v) to give **22** (85.2 mg, 90%,  $\alpha$  only): TLC,  $R_f$  0.47 (EtOAc/toluene, 1:3, v/v, double development); <sup>1</sup>H NMR (500 MHz, CDCl<sub>3</sub>)  $\delta$  7.34-7.14 (m, 20H, -(CH<sub>2</sub>Ph)<sub>4</sub>), 7.00 (dd,  $J$  = 2.3, 6.9 Hz, 2H, Ph of MP), 6.78 (dd,  $J$  = 2.3, 6.9 Hz, 2H, Ph of MP), 5.62 (dd,  $J$  = 3.4, 9.7 Hz, 1H, H-3), 5.42 (dd,  $J$  = 1.7, 3.4 Hz, 1H, H'-2), 5.40 (dd,  $J$  = 1.7, 3.4 Hz, 1H, H-2), 5.30 (d,  $J$  = 1.7 Hz, 1H, H-1), 4.95 (d,  $J$  = 1.7 Hz, 1H, H'-1), 4.86, 4.46 (ABq,  $J$  = 10.9 Hz, 2H, -(CH<sub>2</sub>Ph)<sub>4</sub>), 4.73, 4.52 (ABq,  $J$  = 11.5 Hz, 2H, -(CH<sub>2</sub>Ph)<sub>4</sub>), 4.69, 4.47 (ABq,  $J$  = 11.5 Hz, 2H, -(CH<sub>2</sub>Ph)<sub>4</sub>), 4.65, 4.45 (ABq,  $J$  = 12.0 Hz, 2H, -(CH<sub>2</sub>Ph)<sub>4</sub>), 4.03-4.00 (m, 1H, H-5), 3.94 (t,  $J$  = 9.7 Hz, 1H, H-4), 3.92 (dd,  $J$  = 3.4, 9.2 Hz, 1H, H'-3), 3.89 (t,  $J$  = 9.2 Hz, 1H, H'-4), 3.86 (dd,  $J$  = 4.0, 11.5 Hz, 1H, H-6), 3.79-3.77 (m, 1H, H'-5), 3.73 (dd,  $J$  = 4.0, 10.3 Hz, 1H, H'-6), 3.68 (dd,  $J$  = 1.2, 11.5 Hz, 1H, H-6'), 3.64 (s, 1H, -OCH<sub>3</sub> of MP), 3.60 (dd,  $J$  = 1.7, 10.3 Hz, 1H, H'-6'), 2.14 (s, 3H, -CH<sub>3</sub> of Ac), 1.28 (s, 9H, -(CH<sub>3</sub>)<sub>3</sub> of Piv), 1.20 (s, 9H, -(CH<sub>3</sub>)<sub>3</sub> of Piv); <sup>13</sup>C NMR (125 MHz, CDCl<sub>3</sub>)  $\delta$  177.26, 176.99, 170.15, 155.08, 149.96, 138.44, 138.06, 137.86, 137.48, 128.40 $\times$ 2, 128.37 $\times$ 2, 128.28 $\times$ 2, 128.25 $\times$ 2, 128.04 $\times$ 2, 127.78 $\times$ 5, 127.57, 127.34 $\times$ 2, 117.65 $\times$ 2, 114.59 $\times$ 2, 97.98, 96.37, 78.36 $\times$ 2, 75.21, 74.66, 74.12, 73.35 $\times$ 2, 72.94, 71.94, 71.72, 71.53, 71.24, 69.67, 68.50, 68.19, 65.54, 55.47, 33.90, 38.79, 27.17 $\times$ 3, 27.15 $\times$ 3, 21.09; HRMS calcd. for C<sub>59</sub>H<sub>70</sub>NaO<sub>15</sub> (M+Na)<sup>+</sup>  $m/z$  1041.4612, found 1041.4607.

**4-Methoxyphenyl 2,3-di-*O*-pivaroyl-(3,4,6-tri-*O*-benzyl- $\alpha$ -D-mannopyranosyl)-(1 $\rightarrow$ 6)-*O*-4-benzyl- $\alpha$ -D-mannopyranoside (23).**

H<sub>2</sub>O<sub>2</sub> (35% in water, 140 µL, 0.144 mmol) and LiOH·H<sub>2</sub>O (4.90 mg, 0.117 mmol) were added to a cold (0°C) solution of **22** (37.2 mg, 0.0365 mmol) in THF (1.00 mL). After stirring the reaction mixture for 2 h at room temperature, second portion of H<sub>2</sub>O<sub>2</sub> (35% in water, 58.0 µL, 0.600 mmol) was added at 0°C. After stirring the reaction mixture for 5 h at room temperature, the mixture was diluted with EtOAc (50 mL) and washed with saturated aq. NaHCO<sub>3</sub> (50 mL) and brine (50 mL). The organic layer was dried over Na<sub>2</sub>SO<sub>4</sub>, filtered, and concentrated *in vacuo*. The residue was purified by column chromatography on silica gel (EtOAc/hexane, 1:3, v/v) to give **23** (29.7 mg, 83%): TLC, *R<sub>f</sub>* 0.44 (EtOAc/hexane, 1:1, v/v); <sup>1</sup>H NMR (500 MHz, CDCl<sub>3</sub>) δ 7.35-7.16 (m, 20H, -(CH<sub>2</sub>Ph)<sub>4</sub>), 7.00 (dd, *J* = 2.3, 6.6 Hz, 2H, Ph of MP), 6.78 (dd, *J* = 2.3, 6.6 Hz, 2H, Ph of MP), 5.62 (dd, *J* = 3.4, 9.7 Hz, 1H, H-3), 5.40 (dd, *J* = 1.7, 3.4 Hz, 1H, H-2), 5.30 (d, *J* = 1.7 Hz, 1H, H-1), 5.01 (d, *J* = 1.2 Hz, 1H, H'-1), 4.86, 4.46 (ABq, *J* = 10.9 Hz, 2H, -(CH<sub>2</sub>Ph)<sub>4</sub>), 4.73, 4.52 (ABq, *J* = 11.5 Hz, 2H, -(CH<sub>2</sub>Ph)<sub>4</sub>), 4.69, 4.47 (ABq, *J* = 11.5 Hz, 2H, -(CH<sub>2</sub>Ph)<sub>4</sub>), 4.65, 4.45 (ABq, *J* = 12.0 Hz, 2H, -(CH<sub>2</sub>Ph)<sub>4</sub>), 4.02-4.00 (m, 2H, H-5, H'-2), 3.92 (t, *J* = 9.7 Hz, 1H, H-4), 3.88-3.85 (m, 2H, H-6, H'-4), 3.82 (dd, *J* = 3.4, 9.2 Hz, 1H, H'-3), 3.80-3.77 (m, 1H, H'-5), 3.79-3.77 (m, 1H, H'-5), 3.73-3.68 (m, 2H, H-6', H'-6), 3.64 (s, 1H, -OCH<sub>3</sub> of MP), 3.61 (dd, *J* = 1.7, 10.9 Hz, 1H, H'-6'), 1.26 (s, 9H, -(CH<sub>3</sub>)<sub>3</sub> of Piv), 1.20 (s, 9H, -(CH<sub>3</sub>)<sub>3</sub> of Piv); <sup>13</sup>C NMR (125 MHz, CDCl<sub>3</sub>) δ 177.23, 176.90, 155.09, 149.95, 138.34, 138.11, 137.86, 137.49, 128.51×2, 128.40×2, 128.29×4, 127.92, 127.83×5, 127.71×2, 127.62, 127.53, 127.35×2, 117.73×2, 114.57×2, 99.29, 96.38, 80.11, 75.15, 74.68, 74.22, 73.35, 73.03, 71.94, 71.89, 71.47, 71.18, 69.68, 68.59, 68.18, 65.54, 55.47, 38.90, 38.78, 27.17×3, 27.14×3; HRMS calcd. for C<sub>57</sub>H<sub>68</sub>NaO<sub>14</sub> (M+Na)<sup>+</sup> *m/z* 999.4507, found 999.4524.

**4-Methoxyphenyl O-(2-O-acetyl-3,4,6-tri-O-benzyl-α-D-mannopyranosyl-(1→2)-O-3,4,6-tri-O-benzyl-α-D-mannopyranosyl)-(1→6)-O-2,3-di-O-pivaroyl-4-benzyl-α-D-mannopyranoside (24)**

AgOTf (8.10 mg, 0.0315 mmol), Cp<sub>2</sub>HfCl<sub>2</sub> (6.00 mg, 0.0158 mmol), DTBMP (0.65 mg, 0.0032 mmol) and MS AW-300 (302 mg) were dissolved in toluene (0.500 mL). After stirring the mixture for 10 min at room temperature and for 10 min at -20°C, the solution of **2** (10.1 mg, 0.0204 mmol) and **23** (9.6 mg, 0.00982 mmol) in toluene (0.500 mL) was added at -20°C. After stirring the reaction mixture for 50 min at 0°C, the reaction was quenched with Et<sub>3</sub>N (10.0 µL, 0.0718 mmol) at -20°C. The mixture was filtered through a pad of celite. The filtrate and washings (200 mL of EtOAc) were combined and washed with saturated aq. NaHCO<sub>3</sub> (200 mL) and brine (200 mL). The organic layer was dried over Na<sub>2</sub>SO<sub>4</sub>, filtered, and concentrated *in vacuo*. The residue was purified by column chromatography on silica gel (EtOAc/hexane, 2:7, v/v) to give **24** (14.4 mg, quant., α only): TLC, *R<sub>f</sub>* 0.49 (EtOAc/hexane, 1:3, v/v, double development); <sup>1</sup>H NMR (500 MHz, CDCl<sub>3</sub>) δ 7.33-7.12 (m, 35H, -(CH<sub>2</sub>Ph)<sub>7</sub>), 6.99 (dd, *J* = 2.3, 6.9 Hz, 2H, Ph of MP), 6.76 (dd, *J* = 2.3, 6.9 Hz, 2H, Ph of MP), 5.61 (dd, *J* = 3.4, 9.7 Hz, 1H, H-3), 5.52 (dd, *J* = 1.7, 3.4 Hz, 1H, H''-2), 5.38 (dd, *J* = 1.7, 3.2 Hz, 1H, H-2), 5.27 (d, *J* = 1.7 Hz, 1H, H-1), 5.06 (d, *J* = 1.2 Hz, 1H, H''-1), 4.93 (d, *J* = 1.7 Hz, 1H, H'-1), 4.88-4.37 (m, *J* = 11.5 Hz, 2H, -(CH<sub>2</sub>Ph)<sub>7</sub>), 4.02-3.98 (m, 2H, H'-2, H-5), 3.97 (dd, *J* = 3.4, 9.5 Hz, 1H, H''-3), 3.94-3.91 (m, 1H, H''-5), 3.88-3.83 (m, 5H, H-4, H-6, H''-6, H'-3, H''-4), 3.79-3.76 (m, 1H, H'-5), 3.77 (dd, *J* = 4.0, 10.9 Hz, 1H, H'-4), 3.68 (dd, *J* = 4.6, 10.9 Hz, 1H, H'-6), 3.63 (dd, *J* = 1.7, 10.6 Hz, 1H, H''-6'), 3.60-3.58 (m, 4H, H'-6', -OCH<sub>3</sub> of MP), 3.53 (dd, *J* = 1.2, 10.9 Hz, 1H, H-6'), 2.11 (s, 3H, -CH<sub>3</sub> of Ac), 1.25 (s, 9H, -(CH<sub>3</sub>)<sub>3</sub> of Piv), 1.19 (s, 9H, -(CH<sub>3</sub>)<sub>3</sub> of Piv); <sup>13</sup>C NMR (125 MHz, CDCl<sub>3</sub>) δ 177.28, 176.94, 170.14, 155.09, 150.10, 138.53, 138.45, 138.39, 138.24, 137.98, 137.51, 128.37×4, 128.31×2, 128.26×10, 128.15×2,

127.91×2, 127.79×4, 127.75, 127.63, 127.57, 127.52×2, 127.47×2, 127.37, 127.26×3, 117.73×2, 114.57×2, 99.29, 96.38, 80.11, 75.15, 74.68, 74.22, 73.35, 73.03, 71.94, 71.89, 71.47, 71.18, 69.68, 68.59, 68.18, 65.54, 55.47, 38.90, 38.78, 27.17×3, 27.14×3; HRMS calcd. for C<sub>86</sub>H<sub>98</sub>NaO<sub>20</sub> (M+Na)<sup>+</sup> *m/z* 1473.6549, found 1473.6544.

**4-Methoxyphenyl *O*-(3,4,6-tri-*O*-benzyl- $\alpha$ -D-mannopyranosyl-(1→2))-*O*-3,4,6-tri-*O*-benzyl- $\alpha$ -D-mannopyranosyl)-(1→6)-*O*-4-benzyl- $\alpha$ -D-mannopyranoside (25).**

NaOMe (28% in MeOH; 0.300 mL, 1.56 mmol) was added to a cold (0°C) solution of **24** (71.8 mg, 0.0495 mmol) in MeOH/THF (1:1, v/v, 3.00 mL). After stirring the reaction mixture for 24 h at room temperature, second portion of NaOMe (28% in MeOH; 0.200 mL, 1.04 mmol) was added at 0°C. After stirring the reaction mixture for 1 h at room temperature, third portion of NaOMe (28% in MeOH; 0.300 mL, 1.56 mmol) was added at 0°C. After stirring the reaction mixture for 2 h at room temperature, the reaction mixture was neutralized with Amberlyst 15E at 0°C. The mixture was filtered and concentrated *in vacuo*, before the residue was purified by Flash Chromatography System (EtOAc/toluene, 22:78→42:58, v/v) to give **25** (52.8 mg, 86%): TLC, *R<sub>f</sub>* 0.43 (EtOAc/toluene, 1:1, v/v); <sup>1</sup>H NMR (500 MHz, CDCl<sub>3</sub>)  $\delta$  7.40-7.14 (m, 35H, -(CH<sub>2</sub>Ph)<sub>7</sub>), 6.93 (dd, *J* = 2.3, 6.9 Hz, 2H, Ph of MP), 6.75 (dd, *J* = 2.3, 6.9 Hz, 2H, Ph of MP), 5.30 (d, *J* = 1.7 Hz, 1H, H'-1), 5.22 (d, *J* = 1.7 Hz, 1H, H''-1), 5.11 (d, *J* = 1.7 Hz, 1H, H-1), 4.86-4.45 (m, 14H, -(CH<sub>2</sub>Ph)<sub>7</sub>), 4.14-4.07 (m, 3H, H''-2, H-2, H-5), 3.96-3.93 (m, 2H, H'-2, H-3), 3.90 (dd, *J* = 3.4, 9.2 Hz, 1H, H-4), 3.88-3.74 (m, 7H, H''-3, H'-4, H-6, H''-4, H'-3, H'-5, H''-5), 3.70-3.62 (m, 5H, H-6', H'-6, H''-6, H'-6', H''-6'), 3.61 (s, 3H, -OCH<sub>3</sub> of MP); <sup>13</sup>C NMR (125 MHz, CDCl<sub>3</sub>)  $\delta$  154.91, 150.29, 138.64, 138.37, 138.34, 138.30, 138.07, 137.99, 128.61×2, 128.56×2, 128.54×2, 128.46×2, 128.41×2, 128.39×2, 128.35×2, 128.03×2, 127.96×2, 127.93×2, 127.86×2, 127.84×2, 127.78×2, 127.73, 127.65, 127.58×2, 127.46×2, 117.50×2, 114.70×2, 100.38, 99.23, 98.18, 80.00, 75.83, 75.09, 74.91, 74.86, 74.55, 73.95, 73.52, 73.33, 72.17×2, 72.05, 71.74, 71.64, 71.53, 70.78, 69.57, 69.34, 68.50, 65.85, 55.56; HRMS calcd. for C<sub>74</sub>H<sub>80</sub>NaO<sub>17</sub> (M+Na)<sup>+</sup> *m/z* 1263.5293, found 1263.5294.

**4-Methoxyphenyl *O*-( $\alpha$ -D-mannopyranosyl-(1→2))-*O*- $\alpha$ -D-mannopyranosyl)-(1→6)-*O*- $\alpha$ -D-mannopyranoside (26) = (C3).**

Pd(OH)<sub>2</sub> (20% on carbon, 94.2 mg) was added to a solution of **25** (52.8 mg, 0.0425 mmol) in MeOH/THF (1:1, v/v, 3.00 mL). After stirring the reaction mixture under H<sub>2</sub> atmosphere for 4 h at room temperature, the mixture was filtered through a pad of celite. The filtrate and washings were concentrated *in vacuo*. The residue was purified by gel filtration chromatography on Sephadex LH-20 (3 cm $\Phi$  × 80 cm) (20% EtOH) to give **26** (25.2 mg, 97%): TLC, *R<sub>f</sub>* 0.72 (H<sub>2</sub>O/2-PrOH, 1:3, v/v); <sup>1</sup>H NMR (500 MHz, D<sub>2</sub>O)  $\delta$  7.12 (dd, *J* = 2.3, 6.9 Hz, 2H, Ph of MP), 6.99 (dd, *J* = 2.9, 6.9 Hz, 2H, Ph of MP), 5.50 (d, *J* = 1.7 Hz, 1H, H-1), 5.02 (d, *J* = 1.7 Hz, 1H, H'-1), 4.79 (s, 1H, H''-1 in ddH<sub>2</sub>O), 4.16 (dd, *J* = 1.7, 3.4 Hz, 1H, H-2), 4.01 (dd, *J* = 1.7, 3.4 Hz, 1H, H''-2), 4.00 (dd, *J* = 3.4, 9.7 Hz, 1H, H-3), 3.87-3.80 (m, 7H, H'-6, H'-4, H''-6, -OCH<sub>3</sub> of MP, H'-6), 3.79 (dd, *J* = 3.4, 10.0 Hz, 1H, H''-3), 3.78-3.60 (m, 9H, H'-3, H-6, H'-5, H''-5, H-4, H-6', H'-2, H''-6', H-5), 3.58 (t, *J* = 9.7 Hz, 1H, H''-4); <sup>13</sup>C NMR (125 MHz, D<sub>2</sub>O)  $\delta$  154.55, 149.28, 118.49×2, 115.09×2, 102.26, 98.56, 97.65, 78.91, 73.11, 72.63, 71.44, 70.57, 70.34, 70.05, 69.95, 69.86, 66.96, 66.87, 66.75, 66.07, 61.11, 60.92, 55.81;

HRMS calcd. for  $C_{25}H_{38}NaO_{17}$  ( $M+Na$ )<sup>+</sup>  $m/z$  633.2007 found 633.1998.

**4-Methoxyphenyl 2,3-di-*O*-pivaroyl-(2-*O*-acetyl-3,4,6-tri-*O*-benzyl- $\alpha$ -D-mannopyranosyl)-(1 $\rightarrow$ 4)-*O*-6-benzyl- $\alpha$ -D-mannopyranoside (27).**

AgOTf (115 mg, 0.448 mmol),  $Cp_2HfCl_2$  (84.5 mg, 0.0223 mmol), DTBMP (10.2 mg, 0.0498 mmol) and MS AW-300 (1.51 g) were dissolved in toluene (2.50 mL). After stirring the mixture for 20 min at room temperature and for 30 min at  $-20^\circ C$ , the solution of **2** (149 mg, 0.302 mmol) and **11** (90.4 mg, 0.166 mmol) in toluene (2.50 mL) was added at  $-20^\circ C$ . After stirring the reaction mixture for 70 min at  $0^\circ C$ , the reaction was quenched with  $Et_3N$  (65.0  $\mu L$ , 0.467 mmol) at  $0^\circ C$ . The mixture was filtered through a pad of celite. The filtrate and washings (200 mL of EtOAc) were combined and washed with saturated aq.  $NaHCO_3$  (200 mL) and brine (200 mL). The organic layer was dried over  $Na_2SO_4$ , filtered, and concentrated *in vacuo*. The residue was purified by Flash Chromatography System (UltraPack B, EtOAc/hexane, 14:86 $\rightarrow$ 28:72, v/v) to give **27** (169 mg, 90%,  $\alpha$  only): TLC,  $R_f$  0.47 (EtOAc/hexane, 1:3, v/v, double development);  $^1H$  NMR (500 MHz,  $CDCl_3$ )  $\delta$  7.33-7.10 (m, 20H,  $-(CH_2Ph)_4$ ), 7.04 (dd,  $J = 2.3, 6.9$  Hz, 2H, Ph of MP), 6.79 (dd,  $J = 2.3, 6.9$  Hz, 2H, Ph of MP), 5.56 (dd,  $J = 3.4, 9.7$  Hz, 1H, H-3), 5.37 (dd,  $J = 2.3, 3.4$  Hz, 1H, H-2), 5.34-5.33 (m, 2H, H-1, H'-2), 5.15 (d,  $J = 2.3$  Hz, 1H, H'-1), 4.79, 4.40 (ABq,  $J = 10.9$  Hz, 2H,  $-(CH_2Ph)_4$ ), 4.71, 4.47 (ABq,  $J = 10.9$  Hz, 2H,  $-(CH_2Ph)_4$ ), 4.59, 4.33 (ABq,  $J = 12.0$  Hz, 2H,  $-(CH_2Ph)_4$ ), 4.53, 4.48 (m, 2H,  $-(CH_2Ph)_4$ ), 4.39-4.34 (m, 1H, H-4), 4.01-3.98 (m, 1H, H-5), 3.90-3.87 (m, 2H, H-6, H'-3), 3.84 (t,  $J = 9.2$  Hz, 1H, H'-4), 3.79-3.76 (m, 2H, H'-5,  $-OCH_3$  of MP), 3.71 (dd,  $J = 1.7, 11.2$  Hz, 1H, H-6'), 3.63 (dd,  $J = 4.0, 10.9$  Hz, 1H, H'-6), 3.49 (dd,  $J = 1.7, 10.9$  Hz, 1H, H-6), 3.79-3.77 (m, 1H, H'-5), 3.73 (dd,  $J = 4.0, 10.9$  Hz, 1H, H'-6), 3.68 (dd,  $J = 1.2, 11.5$  Hz, 1H, H-6'), 2.10 (s, 3H,  $-CH_3$  of Ac), 1.22 (s, 9H,  $-(CH_3)_3$  of Piv), 1.20 (s, 9H,  $-(CH_3)_3$  of Piv);  $^{13}C$  NMR (125 MHz,  $CDCl_3$ )  $\delta$  177.46, 177.16, 169.85, 155.23, 150.07, 138.45, 138.31, 138.06, 137.86, 128.35 $\times$ 2, 128.36 $\times$ 2, 128.24 $\times$ 2, 128.21 $\times$ 2, 128.12 $\times$ 2, 127.85 $\times$ 2, 127.81 $\times$ 2, 127.70, 127.58 $\times$ 2, 127.27, 127.11 $\times$ 2, 118.13 $\times$ 2, 114.54 $\times$ 2, 99.54, 96.49, 78.07, 75.02, 73.80, 73.39, 72.98, 72.50, 72.46, 72.22, 71.82, 71.52, 69.31, 69.05, 68.66, 68.54, 55.61, 38.89, 27.10 $\times$ 3, 26.94 $\times$ 3, 21.01; HRMS calcd. for  $C_{59}H_{70}NaO_{15}$  ( $M+Na$ )<sup>+</sup>  $m/z$  1041.4612, found 1041.4611.

**4-Methoxyphenyl 2,3-di-*O*-pivaroyl-(3,4,6-tri-*O*-benzyl- $\alpha$ -D-mannopyranosyl)-(1 $\rightarrow$ 4)-*O*-6-benzyl- $\alpha$ -D-mannopyranoside (28).**

$H_2O_2$  (35% in water, 500  $\mu L$ , 0.514 mmol) and  $LiOH \cdot H_2O$  (18.1 mg, 0.432 mmol) were added to a cold ( $0^\circ C$ ) solution of **28** (138 mg, 0.136 mmol) in THF (2.60 mL). After stirring the reaction mixture for 4.5 h at room temperature, second portion of  $H_2O_2$  (35% in water, 100  $\mu L$ , 0.103 mmol) was added at  $0^\circ C$ . After stirring the reaction mixture for 30 min at room temperature, the mixture was diluted with EtOAc (150 mL) and washed with saturated aq.  $NaHCO_3$  (150 mL) and brine (150 mL). The organic layer was dried over  $Na_2SO_4$ , filtered, and concentrated *in vacuo*. The residue was purified by Flash Chromatography System (EtOAc/hexane, 16:84 $\rightarrow$ 30:70, v/v) to give **28** (120 mg, 90%): TLC,  $R_f$  0.41 (EtOAc/hexane, 1:1, v/v);  $^1H$  NMR (500 MHz,  $CDCl_3$ )  $\delta$  7.36-7.12 (m, 20H,  $-(CH_2Ph)_4$ ), 7.06 (dd,  $J = 2.3, 6.9$  Hz, 2H, Ph of MP), 6.79 (dd,  $J = 2.3, 6.3$  Hz, 2H, Ph of MP), 5.55 (dd,  $J = 3.4, 9.7$  Hz, 1H, H-3), 5.35 (dd,  $J = 2.3, 3.4$  Hz, 1H, H-2), 5.32 (d,  $J = 2.3$  Hz, 1H, H-1), 5.17 (d,  $J = 1.7$  Hz, 1H, H'-1), 4.78, 4.45 (ABq,  $J = 10.9$  Hz, 2H,  $-(CH_2Ph)_4$ ), 4.66 (ABq,  $J = 12.0$

Hz, 2H,  $-(\text{CH}_2\text{Ph})_4$ ), 4.57, 4.38 (ABq,  $J = 12.0$  Hz, 2H,  $-(\text{CH}_2\text{Ph})_4$ ), 4.48 (ABq,  $J = 12.0$  Hz, 2H,  $-(\text{CH}_2\text{Ph})_4$ ), 4.25 (t,  $J = 9.7$  Hz, 1H, H-4), 4.04-4.01 (m, 1H, H-5), 3.90 (dd,  $J = 1.7, 4.6$  Hz, 1H, H'-2), 3.85 (t,  $J = 9.2$  Hz, 1H, H'-4), 3.82-3.72 (m, 7H, H-6, H-6', H'-3,  $-\text{OCH}_3$  of MP, H'-5), 3.61 (dd,  $J = 4.0, 10.3$  Hz, 1H, H'-6), 3.50 (dd,  $J = 1.7, 10.3$  Hz, 1H, H'-6'), 1.23 (s, 9H,  $-(\text{CH}_3)_3$  of Piv), 1.21 (s, 9H,  $-(\text{CH}_3)_3$  of Piv);  $^{13}\text{C}$  NMR (125 MHz,  $\text{CDCl}_3$ )  $\delta$  177.58, 177.21, 155.28, 150.14, 138.37, 138.22, 138.05, 137.78, 128.54 $\times 2$ , 128.28 $\times 4$ , 128.13 $\times 2$ , 127.95, 127.90 $\times 2$ , 127.88 $\times 2$ , 127.73 $\times 2$ , 127.65, 127.57, 127.29, 127.22 $\times 2$ , 118.34 $\times 2$ , 114.53 $\times 2$ , 101.15, 96.71, 79.76, 75.00, 73.89, 73.44, 73.07, 72.97, 72.30, 72.10, 72.06, 71.33, 69.36, 69.33, 68.60, 68.52, 55.60, 38.96, 38.89, 27.12 $\times 3$ , 27.09 $\times 3$ ; HRMS calcd. for  $\text{C}_{57}\text{H}_{68}\text{NaO}_{14}$  ( $\text{M}+\text{Na}$ ) $^+$   $m/z$  999.4507, found 999.4497.

**4-Methoxyphenyl *O*-(2-*O*-acetyl-3,4,6-tri-*O*-benzyl- $\alpha$ -D-mannopyranosyl-(1 $\rightarrow$ 2)-*O*-3,4,6-tri-*O*-benzyl- $\alpha$ -D-mannopyranosyl)-(1 $\rightarrow$ 4)-*O*-2,3-di-*O*-pivaroyl-6-benzyl- $\alpha$ -D-mannopyranoside (29)**

AgOTf (7.70 mg, 0.0300 mmol),  $\text{Cp}_2\text{HfCl}_2$  (5.60 mg, 0.0148 mmol) and MS AW-300 (295 mg) were dissolved in toluene (0.500 mL). After stirring the mixture for 10 min at room temperature and for 10 min at  $-20^\circ\text{C}$ , the solution of **2** (9.80 mg, 0.0198 mmol) and **28** (9.4 mg, 0.00962 mmol) in toluene (0.500 mL) was added at  $-20^\circ\text{C}$ . After stirring the reaction mixture for 50 min at  $0^\circ\text{C}$ , the reaction was quenched with  $\text{Et}_3\text{N}$  (10.0  $\mu\text{L}$ , 0.0718 mmol) at  $-20^\circ\text{C}$ . The mixture was filtered through a pad of celite. The filtrate and washings (200 mL of EtOAc) were combined and washed with saturated aq.  $\text{NaHCO}_3$  (200 mL) and brine (200 mL). The organic layer was dried over  $\text{Na}_2\text{SO}_4$ , filtered, and concentrated *in vacuo*. The residue was purified by column chromatography on silica gel (EtOAc/hexane, 2:7, v/v) to give **29** (11.7 mg, 84%,  $\alpha$  only): TLC,  $R_f$  0.59 (EtOAc/hexane, 1:3, v/v, double development);  $^1\text{H}$  NMR (500 MHz,  $\text{CDCl}_3$ )  $\delta$  7.33-7.12 (m, 35H,  $-(\text{CH}_2\text{Ph})_7$ ), 7.03 (dd,  $J = 1.7, 6.9$  Hz, 2H, Ph of MP), 6.78 (dd,  $J = 1.7, 6.9$  Hz, 2H, Ph of MP), 5.57-5.56 (m, 1H, H''-2), 5.49 (dd,  $J = 2.9, 9.2$  Hz, 1H, H-3), 5.34-5.32 (m, 2H, H-2, H-1), 5.12 (d,  $J = 1.2$  Hz, 1H, H''-1), 5.05 (d,  $J = 1.4$  Hz, 1H, H'-1), 4.88-4.37 (m, 14H,  $-(\text{CH}_2\text{Ph})_7$ ), 4.24 (t,  $J = 9.2$  Hz, 1H, H-4), 3.96-3.93 (m, 4H, H-5, H'-2, H''-3, H-6), 3.90-3.81 (m, 4H, H'-3, H''-4, H''-5, H'-4), 3.80 (dd,  $J = 2.3, 11.2$  Hz, 1H, H''-6), 3.78-3.74 (m, 4H,  $-\text{OCH}_3$  of MP, H'-5), 3.70 (dd,  $J = 1.2, 10.9$  Hz, 1H, H-6'), 3.57-3.48 (m, 3H, H''-6', H'-6, H'-6'), 2.09 (s, 3H,  $-\text{CH}_3$  of Ac), 1.20 (s, 9H,  $-(\text{CH}_3)_3$  of Piv), 1.17 (s, 9H,  $-(\text{CH}_3)_3$  of Piv);  $^{13}\text{C}$  NMR (125 MHz,  $\text{CDCl}_3$ )  $\delta$  177.34, 177.12, 170.09, 155.24, 150.13, 138.65, 138.49, 138.27 $\times 2$ , 138.15, 138.02 $\times 2$ , 128.37 $\times 2$ , 128.27 $\times 8$ , 128.15 $\times 2$ , 128.14 $\times 2$ , 128.08 $\times 2$ , 127.95 $\times 2$ , 127.82 $\times 2$ , 127.72 $\times 2$ , 127.57 $\times 4$ , 127.53 $\times 2$ , 127.45 $\times 3$ , 127.40, 127.19, 127.09 $\times 2$ , 118.25 $\times 2$ , 114.52 $\times 2$ , 78.14, 75.01, 74.84, 74.71, 74.38, 73.85, 73.40, 73.28, 72.78, 72.17, 71.98, 71.76, 71.64, 71.47, 69.37, 69.11, 69.06, 68.56, 68.35, 55.62, 38.88, 38.84, 27.24 $\times 3$ , 27.10 $\times 3$ , 21.16; HRMS calcd. for  $\text{C}_{86}\text{H}_{98}\text{NaO}_{20}$  ( $\text{M}+\text{Na}$ ) $^+$   $m/z$  1473.6549, found 1473.6552.

**4-Methoxyphenyl *O*-(3,4,6-tri-*O*-benzyl- $\alpha$ -D-mannopyranosyl-(1 $\rightarrow$ 2)-*O*-3,4,6-tri-*O*-benzyl- $\alpha$ -D-mannopyranosyl)-(1 $\rightarrow$ 4)-*O*-6-benzyl- $\alpha$ -D-mannopyranoside (30).**

NaOMe (28% in MeOH; 0.100 mL, 0.520 mmol) was added to a cold ( $0^\circ\text{C}$ ) solution of **29** (59.8 mg, 0.0412 mmol) in MeOH/THF (1:1, v/v, 1.00 mL). After stirring the reaction mixture for 5.5 h at room temperature, second portion of NaOMe (28% in MeOH; 0.0500 mL, 0.260 mmol) was added at  $0^\circ\text{C}$ . After stirring the reaction mixture for 15.5 h at room temperature, the reaction mixture was neutralized with Amberlyst 15E at  $0^\circ\text{C}$ . The mixture was filtered and concentrated *in vacuo*, before the residue was purified by Flash

Chromatography System (EtOAc/toluene, 31:69→61:39, v/v) to give **30** (47.6 mg, 93%): TLC,  $R_f$  0.24 (EtOAc/toluene, 1:1, v/v);  $^1\text{H}$  NMR (500 MHz,  $\text{CDCl}_3$ )  $\delta$  7.37-7.16 (m, 35H,  $-(\text{CH}_2\text{Ph})_7$ ), 7.02 (dd,  $J = 2.3$ , 6.9 Hz, 2H, Ph of MP), 6.78 (dd,  $J = 2.3$ , 6.9 Hz, 2H, Ph of MP), 5.45 (d,  $J = 1.7$  Hz, 1H, H''-1), 5.38 (d,  $J = 1.7$  Hz, 1H, H-1), 5.31 (d,  $J = 1.3$  Hz, 1H, H'-1), 4.85-4.39 (m, 14H,  $-(\text{CH}_2\text{Ph})_7$ ), 4.28 (dd,  $J = 1.7$ , 2.6 Hz, 1H, H''-2), 4.13 (dd,  $J = 1.7$ , 3.4 Hz, 1H, H-2), 4.02-3.95 (m, 2H, H-5, H-6), 3.92 (dd,  $J = 3.4$ , 9.2 Hz, 1H, H-3), 3.89-3.75 (m, 6H, H'-4, H''-3, H-4, H'-3, H''-5, H'-5), 3.74 (s, 1H,  $-\text{OCH}_3$  of MP), 3.70-3.54 (m, 8H, H-6', H''-6, H''-6', H'-6', H-4, H''-4, H'-2, H-6);  $^{13}\text{C}$  NMR (125 MHz,  $\text{CDCl}_3$ )  $\delta$  154.97, 150.38, 138.42, 138.38, 138.34, 138.14, 138.05, 137.78, 137.39, 128.64 $\times$ 2, 128.49 $\times$ 2, 128.46 $\times$ 2, 128.37 $\times$ 2, 128.27 $\times$ 6, 128.14 $\times$ 6, 127.97 $\times$ 2, 127.89 $\times$ 2, 127.87 $\times$ 2, 127.74 $\times$ 2, 127.71, 127.60 $\times$ 3, 127.45 $\times$ 2, 127.27, 118.06 $\times$ 2, 114.53 $\times$ 2, 99.83, 99.47, 98.33, 79.97, 75.02, 74.98, 74.63, 74.51, 74.10, 73.97, 73.40, 73.13, 72.80, 72.40, 72.16, 71.74, 71.41, 71.37, 70.94, 70.78, 70.39, 69.71, 69.14, 68.19, 55.58; HRMS calcd. for  $\text{C}_{74}\text{H}_{80}\text{NaO}_{17}$  ( $\text{M}+\text{Na}$ ) $^+$   $m/z$  1263.5293, found 1263.5284.

**4-Methoxyphenyl *O*-( $\alpha$ -D-mannopyranosyl-(1→2)-*O*- $\alpha$ -D-mannopyranosyl)-(1→4)-*O*- $\alpha$ -D-mannopyranoside (**31**) = (D3).**

$\text{Pd}(\text{OH})_2$  (20% on carbon, 83.4 mg) was added to a solution of **30** (47.6 mg, 0.0383 mmol) in MeOH/THF (1:1, v/v, 1.00 mL). After stirring the reaction mixture under  $\text{H}_2$  atmosphere for 25 h at room temperature, the mixture was filtered through a pad of celite. The filtrate and washings were concentrated *in vacuo*. The residue was purified by gel filtration chromatography on Sephadex LH-20 (3 cm $\Phi$   $\times$  80 cm) (20% EtOH) to give **31** (19.6 mg, 84%): TLC,  $R_f$  0.64 ( $\text{H}_2\text{O}/2\text{-PrOH}$ , 1:3, v/v);  $^1\text{H}$  NMR (500 MHz,  $\text{D}_2\text{O}$ )  $\delta$  7.09 (dd,  $J = 2.3$ , 6.9 Hz, 2H, Ph of MP), 6.96 (dd,  $J = 2.3$ , 6.6 Hz, 2H, Ph of MP), 5.50 (d,  $J = 1.7$  Hz, 1H, H'-1), 5.46 (d,  $J = 1.7$  Hz, 1H, H''-1), 5.04 (d,  $J = 1.7$  Hz, 1H, H-1), 4.13 (dd,  $J = 3.4$ , 9.2 Hz, 1H, H'-3), 4.11-4.10 (m, 2H, H'-2, H''-2), 4.06 (dd,  $J = 1.7$ , 3.4 Hz, 1H, H-2), 3.97 (dd,  $J = 3.4$ , 9.7 Hz, 1H, H''-3), 3.89-3.83 (m, 4H, H'-6, H'-4, H-5, H-3), 3.81-3.80 (m, 1H, H'-5), 3.79 (s, 1H,  $-\text{OCH}_3$  of MP), 3.78-3.73 (m, 5H, H-6, H'-6', H'-6, H''-6, H''-6', H-6'), 3.71 (t,  $J = 9.4$  Hz, 1H, H''-4), 3.67-3.63 (m, 2H, H-4, H''-5);  $^{13}\text{C}$  NMR (125 MHz,  $\text{D}_2\text{O}$ )  $\delta$  154.65, 149.63, 118.75 $\times$ 2, 115.05 $\times$ 2, 102.26, 100.00, 99.09, 78.79, 74.39, 73.79, 73.74, 73.23, 71.85, 70.97, 70.49, 70.36, 70.09, 70.01, 66.77, 66.75, 61.04, 60.90, 60.81, 55.80; HRMS calcd. for  $\text{C}_{25}\text{H}_{38}\text{NaO}_{17}$  ( $\text{M}+\text{Na}$ ) $^+$   $m/z$  633.2007, found 633.1997.

**4-Methoxyphenyl *O*-( $\alpha$ -D-mannopyranosyl)-(1→2)-*O*- $\alpha$ -D-mannopyranoside (**32**) = (A2).**

$\text{Pd}(\text{OH})_2$  (20% on carbon, 41.2 mg) was added to a solution of **13** (23.7 mg, 0.0240 mmol) in MeOH (2.00 mL). After stirring the reaction mixture under  $\text{H}_2$  atmosphere for 21 h at room temperature, the mixture was filtered through a pad of celite. The filtrate and washings were concentrated *in vacuo*. The residue was purified by gel filtration chromatography on Sephadex G-10 (3 cm $\Phi$   $\times$  80 cm) (20% EtOH) to give **32** (8.13 mg, 76%). Physical data were consistent with those reported previously<sup>(6)</sup>: TLC,  $R_f$  0.67 ( $\text{H}_2\text{O}/2\text{-PrOH}$ , 2:3, v/v);  $^1\text{H}$  NMR (500 MHz,  $\text{D}_2\text{O}$ )  $\delta$  7.05 (dd,  $J = 2.3$ , 6.6 Hz, 2H, Ph of MP), 6.90 (dd,  $J = 2.3$ , 6.9 Hz, 2H, Ph of MP), 5.69 (d,  $J = 2.3$  Hz, 1H, H-1), 5.00 (d,  $J = 2.3$  Hz, 1H, H'-1), 4.11 (dd,  $J = 2.3$ , 3.4 Hz, 1H, H-2), 4.06 (dd,  $J = 3.4$ , 8.3 Hz, 1H, H'-6), 4.03 (dd,  $J = 2.3$ , 3.4 Hz, 1H, H'-2), 3.81 (dd,  $J = 2.3$ , 12.0 Hz, 1H, H-6), 3.79-3.75 (m, 2H, H'-3, H'-6'), 3.74-3.72 (m, 4H, H-4,  $-\text{OCH}_3$  of MP), 3.71-3.65 (m, 3H, H-3, H-5, H'-5) 3.62 (dd,  $J = 6.9$ , 12.0

Hz, 1H, H-6'), 3.53 (t,  $J = 9.7$  Hz, H'-4).

**4-Methoxyphenyl *O*-(3,4,6-tri-*O*-benzyl- $\alpha$ -D-mannopyranosyl)-(1 $\rightarrow$ 2)-*O*-4,6-benzylidene- $\alpha$ -D-mannopyranoside (33).**

NaOMe (28% in MeOH; 0.100 mL, 0.520 mmol) was added to a cold (0°C) solution of **18** (15.6 mg, 0.0175 mmol) in MeOH/THF (1:1, v/v, 1.00 mL). After stirring the reaction mixture for 5 h at room temperature, the reaction mixture was neutralized with Amberlyst 15E at 0°C. The mixture was filtered and concentrated *in vacuo*, before the residue was purified by Flash Chromatography System (EtOAc/toluene, 34:66 $\rightarrow$ 45:55, v/v) to give **33** (11.7 mg, 83%): TLC,  $R_f$  0.49 (EtOAc/hexane, 1:1, v/v);  $^1\text{H}$  NMR (500 MHz,  $\text{CDCl}_3$ )  $\delta$  7.48-7.19 (m, 20H,  $-(\text{CH}_2\text{Ph})_3$ , Ph of Bzl), 6.92 (dd,  $J = 2.3, 6.9$  Hz, 2H, Ph of MP), 6.83 (dd,  $J = 2.3, 6.9$  Hz, 2H, Ph of MP), 5.56 (s, 1H, Ph of Bzl), 5.16 (d,  $J = 1.2$  Hz, 1H, H-1), 5.14 (d,  $J = 1.7$  Hz, 1H, H'-1), 4.83, 4.48 (ABq,  $J = 10.9$  Hz, 2H,  $-(\text{CH}_2\text{Ph})_3$ ), 4.70-4.66 (m, 2H,  $-(\text{CH}_2\text{Ph})_3$ ), 4.57, 4.51 (ABq,  $J = 11.5$  Hz, 2H,  $-(\text{CH}_2\text{Ph})_3$ ), 4.38-4.36 (m, 1H, H'-2), 4.23 (dd,  $J = 3.4, 9.7$  Hz, 1H, H'-3), 4.21-4.19 (m, 1H, H-5), 4.16 (dd,  $J = 4.6, 10.3$  Hz, 1H, H'-6), 4.08 (t,  $J = 9.7$  Hz, 1H, H'-4), 3.97-3.93 (m, 1H, H'-5), 3.93 (dd,  $J = 3.4, 8.6$  Hz, 1H, H-3), 3.85-3.81 (m, 2H, H-4, H'-6'), 3.78 (s, 1H,  $-\text{OCH}_3$  of MP), 3.62 (dd,  $J = 8.6, 9.7$  Hz, 1H, H-6), 3.62 (dd,  $J = 8.6, 9.7$  Hz, 1H, H-6');  $^{13}\text{C}$  NMR (125 MHz,  $\text{CDCl}_3$ )  $\delta$  154.96, 149.91, 137.93, 137.65, 137.52, 137.24, 128.97, 128.54 $\times$ 2, 128.47 $\times$ 2, 128.41 $\times$ 2, 128.23 $\times$ 2, 128.14 $\times$ 2, 128.04, 127.94 $\times$ 3, 128.88 $\times$ 2, 127.81, 126.17 $\times$ 2, 117.53 $\times$ 2, 114.58 $\times$ 2, 101.78, 100.39, 99.57, 79.88, 77.17, 74.90, 74.63, 73.75, 72.18, 71.56, 69.65 $\times$ 2, 68.70, 68.60, 64.30, 55.64; HRMS calcd. for  $\text{C}_{47}\text{H}_{50}\text{NaO}_{12}$  ( $\text{M}+\text{Na}$ ) $^+$   $m/z$  829.3200, found 829.3203.

**4-Methoxyphenyl *O*-( $\alpha$ -D-mannopyranosyl)-(1 $\rightarrow$ 3)-*O*- $\alpha$ -D-mannopyranoside (34) = (B2).**

$\text{Pd}(\text{OH})_2$  (20% on carbon, 14.4 mg) was added to a solution of **33** (11.7 mg, 0.0145 mmol) in THF/MeOH (1:1, v/v, 1.00 mL). After stirring the reaction mixture under  $\text{H}_2$  atmosphere for 26 h at room temperature, the mixture was filtered through a pad of celite. The filtrate and washings were concentrated *in vacuo*. The residue was purified by gel filtration chromatography on Sephadex G-10 (3 cm $\Phi$   $\times$  80 cm) (20% EtOH) to give **34** (6.00 mg, 92%): TLC,  $R_f$  0.73 ( $\text{H}_2\text{O}/2\text{-PrOH}$ , 2:3, v/v);  $^1\text{H}$  NMR (500 MHz,  $\text{D}_2\text{O}$ )  $\delta$  7.12 (dd,  $J = 2.3, 6.9$  Hz, 2H, Ph of MP), 6.98 (dd,  $J = 2.3, 6.9$  Hz, 2H, Ph of MP), 5.47 (d,  $J = 1.7$  Hz, 1H, H-1), 5.18 (d,  $J = 1.7$  Hz, 1H, H'-1), 4.31 (dd,  $J = 1.7, 3.4$  Hz, 1H, H-2), 4.13 (dd,  $J = 3.4, 9.2$  Hz, 1H, H-3), 4.09 (dd,  $J = 1.7, 3.4$  Hz, 1H, H'-2), 3.90 (dd,  $J = 3.4, 9.7$  Hz, 1H, H'-3), 3.91-3.89 (m, 1H, H-5), 3.86 (t,  $J = 9.2$  Hz, 1H, H-4), 3.81-3.72 (m, 8H, H'-5,  $-\text{OCH}_3$  of MP, H-6, H-6', H'-6, H'-6') 3.67 (dd,  $J = 9.7$  Hz, 1H, H'-4);  $^{13}\text{C}$  NMR (125 MHz,  $\text{D}_2\text{O}$ )  $\delta$  154.66, 149.60, 118.73 $\times$ 2, 115.09 $\times$ 2, 102.43, 99.13, 77.93, 73.56, 73.43, 70.42, 70.09, 69.60, 66.82, 66.00, 61.02, 60.59, 55.82; HRMS calcd. for  $\text{C}_{19}\text{H}_{28}\text{NaO}_{12}$  ( $\text{M}+\text{Na}$ ) $^+$   $m/z$  471.1478, found 471.1470.

**4-Methoxyphenyl *O*-(3,4,6-tri-*O*-benzyl- $\alpha$ -D-mannopyranosyl)-(1 $\rightarrow$ 6)-*O*-4-benzyl- $\alpha$ -D-mannopyranoside (35).**

NaOMe (28% in MeOH; 0.0500 mL, 0.260 mmol) was added to a cold (0°C) solution of **23** (33.0 mg, 0.0338 mmol) in MeOH/THF (1:1, v/v, 1.00 mL). After stirring the reaction mixture for 12 h at room temperature, the reaction mixture was neutralized with Amberlyst 15E at 0°C. The mixture was filtered and concentrated *in vacuo*, before the residue was purified by Flash Chromatography System (EtOAc/hexane, 29:71 $\rightarrow$ 8:92, v/v)

to give **35** (30.5 mg, quant.): TLC,  $R_f$  0.37 (EtOAc/hexane, 1:2, v/v);  $^1\text{H}$  NMR (500 MHz,  $\text{CDCl}_3$ )  $\delta$  7.34-7.17 (m, 20H,  $-(\text{CH}_2\text{Ph})_4$ ), 6.96 (dd,  $J = 2.3, 6.9$  Hz, 2H, Ph of MP), 6.76 (dd,  $J = 2.3, 6.6$  Hz, 2H, Ph of MP), 5.42 (d,  $J = 1.7$  Hz, 1H, H-1), 4.98 (d,  $J = 1.2$  Hz, 1H, H'-1), 4.83, 4.50 (ABq,  $J = 10.9$  Hz, 2H,  $-(\text{CH}_2\text{Ph})_4$ ), 4.78-4.44 (m, 6H,  $-(\text{CH}_2\text{Ph})_4$ ), 4.12 (dd,  $J = 3.4, 9.2$  Hz, 1H, H-3), 4.05 (dd,  $J = 1.7, 3.4$  Hz, 1H, H-2), 4.02 (dd,  $J = 1.7, 2.9$  Hz, 1H, H'-2), 3.90-3.83 (m, 3H, H-5, H'-6, H'-6'), 3.83-3.80 (m, 1H, H'-5), 3.80 (dd,  $J = 2.9, 9.2$  Hz, 1H, H'-3), 3.73-3.68 (m, 2H, H-6, H'-4), 3.65 (t,  $J = 9.2$  Hz, 1H, H-4), 3.62-3.59 (m, 2H, H-6' -OCH<sub>3</sub> of MP);  $^{13}\text{C}$  NMR (125 MHz,  $\text{CDCl}_3$ )  $\delta$  154.82, 150.04, 138.42, 138.09, 137.96 $\times 2$ , 128.56 $\times 2$ , 128.47 $\times 2$ , 128.33 $\times 2$ , 128.28 $\times 2$ , 127.94 $\times 2$ , 127.92, 127.84 $\times 5$ , 127.73 $\times 2$ , 126.64, 127.58, 117.36 $\times 2$ , 114.61 $\times 2$ , 99.44, 97.98, 79.80, 75.75, 75.06, 74.76, 74.14, 73.40, 71.81, 71.65, 71.12, 71.07, 70.87, 68.78, 68.11, 65.92, 55.42; HRMS calcd. for  $\text{C}_{47}\text{H}_{52}\text{NaO}_{12}$  ( $\text{M}+\text{Na}$ ) $^+$   $m/z$  831.3356, found 831.3342.

#### 4-Methoxyphenyl *O*-( $\alpha$ -D-mannopyranosyl)-(1 $\rightarrow$ 6)-*O*- $\alpha$ -D-mannopyranoside (**36**) = (C2).

$\text{Pd}(\text{OH})_2$  (20% on carbon, 36.2 mg) was added to a solution of **35** (30.5 mg, 0.0377 mmol) in THF/MeOH (1:1, v/v, 1.00 mL). After stirring the reaction mixture under  $\text{H}_2$  atmosphere for 21.5 h at room temperature, the mixture was filtered through a pad of celite. The filtrate and washings were concentrated *in vacuo*. The residue was purified by gel filtration chromatography on Sephadex G-10 (3 cm  $\Phi$   $\times$  80 cm) (20% EtOH) to give **36** (16.9 mg, quant.): TLC,  $R_f$  0.69 ( $\text{H}_2\text{O}/2\text{-PrOH}$ , 1:2, v/v);  $^1\text{H}$  NMR (500 MHz,  $\text{D}_2\text{O}$ )  $\delta$  7.11 (dd,  $J = 2.3, 6.9$  Hz, 2H, Ph of MP), 6.98 (dd,  $J = 2.3, 6.6$  Hz, 2H, Ph of MP), 5.51 (d,  $J = 1.7$  Hz, 1H, H-1), 4.73 (d,  $J = 1.7$  Hz, 1H, H'-1), 4.17 (dd,  $J = 1.7, 3.4$  Hz, 1H, H-2), 4.01 (dd,  $J = 3.4, 9.2$  Hz, 1H, H-3), 3.90-3.88 (m, 1H, H-5), 3.87-3.82 (m, 2H, H-6, H'-3), 3.81 (s, 1H, -OCH<sub>3</sub> of MP), 3.75-3.67 (m, 5H, H-4, H-6', H'-4, H'-5, H'-2), 3.64-3.59 (m, 2H, H'-6, H'-6');  $^{13}\text{C}$  NMR (125 MHz,  $\text{CDCl}_3$ )  $\delta$  154.64, 149.21, 118.67 $\times 2$ , 115.06 $\times 2$ , 98.90, 98.71, 72.66, 71.18, 70.62, 70.54, 69.95, 69.87, 66.81, 66.71, 65.52, 60.94, 55.83; HRMS calcd. for  $\text{C}_{19}\text{H}_{28}\text{NaO}_{12}$  ( $\text{M}+\text{Na}$ ) $^+$   $m/z$  471.1478, found 471.1469.

#### 4-Methoxyphenyl *O*-(3,4,6-tri-*O*-benzyl- $\alpha$ -D-mannopyranosyl)-(1 $\rightarrow$ 4)-*O*-6-benzyl- $\alpha$ -D-mannopyranoside (**37**).

NaOMe (28% in MeOH; 0.0500 mL, 0.260 mmol) was added to a cold (0°C) solution of **28** (16.1 mg, 0.0158 mmol) in MeOH/THF (1:1, v/v, 1.00 mL). After stirring the reaction mixture for 13 h at room temperature, second portion NaOMe (28% in MeOH; 0.0500 mL, 0.260 mmol) was added at 0°C. After stirring the reaction mixture for 3 h at room temperature, the reaction mixture was neutralized with Amberlyst 15E at 0°C. The mixture was filtered and concentrated *in vacuo*, before the residue was purified by column chromatography on silica gel (MeOH/ $\text{CHCl}_3$ , 1:25, v/v) to give **37** (11.8 mg, 77%): TLC,  $R_f$  0.33 (EtOAc);  $^1\text{H}$  NMR (500 MHz,  $\text{CD}_3\text{OD}$ )  $\delta$  7.42-7.17 (m, 20H,  $-(\text{CH}_2\text{Ph})_4$ ), 7.04 (dd,  $J = 2.3, 6.9$  Hz, 2H, Ph of MP), 6.82 (dd,  $J = 2.3, 6.6$  Hz, 2H, Ph of MP), 5.36 (d,  $J = 2.3$  Hz, 1H, H-1), 5.34 (d,  $J = 1.7$  Hz, 1H, H'-1), 4.81, 4.48 (ABq,  $J = 10.9$  Hz, 2H,  $-(\text{CH}_2\text{Ph})_4$ ), 4.77, 4.59 (ABq,  $J = 11.5$  Hz, 2H,  $-(\text{CH}_2\text{Ph})_4$ ), 4.49, 4.38 (ABq,  $J = 10.9$  Hz, 2H,  $-(\text{CH}_2\text{Ph})_4$ ), 4.38, 4.36 (ABq,  $J = 11.5$  Hz, 2H,  $-(\text{CH}_2\text{Ph})_4$ ), 4.23 (t,  $J = 2.3$  Hz, 1H, H-2), 4.00 (dd,  $J = 3.4, 9.2$  Hz, 1H, H'-3), 3.95 (dd,  $J = 1.7, 3.4$  Hz, 1H, H'-2), 3.92 (t,  $J = 9.2$  Hz, 1H, H'-4), 3.84-3.74 (m, 4H, H'-5, H-3, H-4, H-5), 3.72 (s, 3H, -OCH<sub>3</sub> of MP), 3.71-3.70 (m, 2H, H-6, H'-6, H'-6'), 3.56 (dd,  $J = 5.2, 10.6$  Hz, 1H, H-6), 3.51 (dd,  $J = 2.3, 10.6$  Hz, 1H, H-6');  $^{13}\text{C}$  NMR (125 MHz,  $\text{CD}_3\text{OD}$ )  $\delta$  156.62, 151.75, 139.86, 139.83, 139.57,

139.14, 129.40×2, 129.33×2, 129.29×4, 129.13×4, 129.13×2, 128.89×2, 128.74, 128.68, 128.65, 128.55, 119.24×2, 115.60×2, 102.93, 100.75, 80.83, 75.96, 75.52, 75.47, 74.40, 74.05, 73.42, 73.08, 72.49, 72.46, 72.26, 70.97, 70.51, 69.06, 56.01 ; HRMS calcd. for C<sub>47</sub>H<sub>52</sub>NaO<sub>12</sub> (M+Na)<sup>+</sup> *m/z* 831.3356, found 831.3357.

#### **4-Methoxyphenyl *O*-( $\alpha$ -D-mannopyranosyl)-(1 $\rightarrow$ 4)-*O*- $\alpha$ -D-mannopyranoside (38) = (D2).**

Pd(OH)<sub>2</sub> (20% on carbon, 11.2 mg) was added to a solution of **37** (11.8 mg, 0.0121 mmol) in THF/MeOH (1:1, v/v, 1.00 mL). After stirring the reaction mixture under H<sub>2</sub> atmosphere for 4.5 h at room temperature, the mixture was filtered through a pad of celite. The filtrate and washings were concentrated *in vacuo*. The residue was purified by gel filtration chromatography on Sephadex LH-20 (3 cm $\Phi$   $\times$  80 cm) (20% EtOH) to give **38** (5.00 mg, 92%): TLC, *R<sub>f</sub>* 0.64 (H<sub>2</sub>O/2-PrOH, 1:4, v/v); <sup>1</sup>H NMR (500 MHz, D<sub>2</sub>O)  $\delta$  7.10 (dd, *J* = 2.3, 6.9 Hz, 2H, Ph of MP), 6.96 (dd, *J* = 2.3, 6.9 Hz, 2H, Ph of MP), 5.47 (d, *J* = 1.7 Hz, 1H, H-1), 5.25 (d, *J* = 1.7 Hz, 1H, H'-1), 4.14 (dd, *J* = 3.4, 9.2 Hz, 1H, H-3), 4.10 (dd, *J* = 1.7, 3.4 Hz, 1H, H-2), 4.06 (dd, *J* = 1.7, 3.4 Hz, 1H, H'-2), 3.88 (t, *J* = 9.2 Hz, 1H, H-4), 3.87 (t, *J* = 9.2 Hz, 1H, H'-4), 3.82-3.78 (m, 5H, H-5, H'-3, -OCH<sub>3</sub> of MP), 3.76-3.72 (m, 3H, H-6, H'-6, H'-5), 3.68-3.63 (m, 2H, H-6', H'-6'); <sup>13</sup>C NMR (125 MHz, CDCl<sub>3</sub>)  $\delta$  154.65, 149.57, 118.77×2, 115.05×2, 101.56, 99.07, 74.12, 73.72, 71.86, 70.93, 70.42, 70.36, 70.30, 66.55, 60.91, 60.79, 55.78; HRMS calcd. for C<sub>19</sub>H<sub>28</sub>NaO<sub>12</sub> (M+Na)<sup>+</sup> *m/z* 471.1478, found 471.1468.

#### **General methods & materials for enzymatic assay**

Reagents were purchased from suppliers and used without further purification. SAMP6 livers were purchased from Sankyo Labo Service. Anti-GM130 (610822) and anti-BiP (ab21685) antibodies were obtained from BD Biosciences and abcam, respectively. Anti-rabbit IgG (goat), HRP-labeled antibody (NEF812001EA) was purchased from perkinelmer and anti-mouse IgG (H+L) antibody (A4416) was obtained from Sigma Aldrich. HPLC was performed by a JASCO LC-2000 system with TSK-GEL Amide-80 column (5  $\mu$ m, 4.6 mm I.D.  $\times$  25 cm) from TOSOH Co.

#### **Enzymatic assay**

##### **Extraction of ER fraction from SAMP6 livers (Figure S1).**

SAMP6 livers (8-week-old, male, 0.4 g) were minced by a surgical scissors, and the paste was transferred to a motor-driven tight fitting glass/Teflon Potter-Elvehjem homogenizer. ER Extraction Buffer (4 mL) [Sucrose (0.25 M), EDTA (2 mM), HEPES (10 mM, pH 7.4), EDTA-free protease inhibitor cocktail (1 tablet per 50 mL, Poche)] was added to the homogenizer and the suspension was crushed (20 strokes, 4°C). Resulting homogenates were centrifuged (900 g, 4°C) for 10 min. Subsequently, recovered supernatant was centrifuged (5,000 g, 4°C) for 10 min. Then the supernatant was centrifuged (8,000 g, 4°C) for 10 min. After further centrifugation step (20000 g, 4°C, 120 min), the recovered pellet was obtained as the ER fraction. ER-solubilization Buffer (10  $\mu$ L per 1 mg of the ER pellet) [Sucrose (0.25 M), EDTA (2 mM), HEPES (10 mM, pH 7.4), EDTA-free protease inhibitor cocktail (1 tablet per 50 mL, Roche), TritonX-100 (0.6%)] was added to the pellet and the suspension was incubated at 4°C for 2 h. The protein concentration of the ER fraction was measured using a bicinchoninic acid (BCA) assay kit (Thermo Fisher Scientific) according to the manufacturers' instructions. Each purity of the preparations was analyzed by western blotting using anti-BiP

and anti-GM130 antibodies as ER and Golgi apparatus marker proteins, respectively.

#### **Validation and assessment of purity of the ER fraction (Figure S1).**

Each protein sample (40  $\mu$ L) was added to the 5 $\times$  SDS-PAGE sample buffer [Tris-HCl (250 mM, pH 6.8), DTT (375 mM), SDS (10%), glycerol (50%), Bromophenol Blue (0.1%)] and heated at 100°C for 3 min. The samples were centrifuged (15000 g, 4°C, 3 min). The recovered supernatant (5  $\mu$ L for anti-BiP antibody or 15  $\mu$ L for anti-GM130 antibody) was resolved on SDS-PAGE (7.5% Tris/HCl gel) and transferred onto polyvinylidene difluoride (PVDF) membranes. The membranes were incubated with Blocking One (Nacalai Tesque) at room temperature for 1 h. Then anti-BiP antibody (5000-fold dilution) or anti-GM130 antibody (500-fold dilution) was added to the membrane and it was incubated at 4°C for 16 h. After wash steps of membranes by TBS-T (5, 10, 15 min), secondary antibody solutions [anti-rabbit IgG (Goat) or anti-mouse IgG (H+L)] were added to the membranes and reacted with the membranes at room temperature for 30 min. After the same wash steps, the membranes were reacted by a chemiluminescent reagent (Immobilon Western, Millipore). The bands were detected using FluoroChemQ image analyzer (protein simple).

#### **Individual glycohydrolysis assay of the synthetic trimannosides in the ER fraction (Figure 4).**

Reaction mixtures (20  $\mu$ L) contained the ER fraction (3 mg/mL), TritonX-100 (0.6%), CaCl<sub>2</sub> (10 mM), HEPES (10 mM, pH 7.4), and each trimannosides (**A3**, **B3**, **C3** or **D3**) (250  $\mu$ M). The mixtures were incubated for 1, 2, 4, 6 and 8 h at 37°C. After incubation, CH<sub>3</sub>CN (45  $\mu$ L) and ddH<sub>2</sub>O (42  $\mu$ L) were added to the mixture (3  $\mu$ L) to stop enzymatic reaction. The samples were centrifuged (20,000  $\times$  g, 4°C, 20 min) and the recovered supernatant (50  $\mu$ L) was analyzed by HPLC [TSK-GEL Amide-80 column 5  $\mu$ m (4.6 mm I.D.  $\times$  25 cm); mobile phase: CH<sub>3</sub>CN/ddH<sub>2</sub>O; linear gradients: 98:2 to 90:10 over 10 min and 90:10 to 65:35 over 10 min; flow rate: 1.0 mL/min; temperature: 40°C; detection: 284 nm].

#### **Influence of D2 on the hydrolysis of the synthetic trimannosides in the ER fraction (Figure S3).**

Reaction mixtures (20  $\mu$ L) contained ER fraction (3 mg/mL), TritonX-100 (0.6%), CaCl<sub>2</sub> (10 mM), HEPES (10 mM, pH 7.4), trimannosides (**A3**, **B3** or **C3**) (250  $\mu$ M) and **D2** (50  $\mu$ M). The mixtures were incubated for 1, 2, 4, 6 and 8 h at 37°C. After incubation, CH<sub>3</sub>CN (45  $\mu$ L) and ddH<sub>2</sub>O (42  $\mu$ L) were added to the mixture (3  $\mu$ L) to stop enzymatic reaction. The samples were centrifuged (20,000  $\times$  g, 4°C, 20 min) and the recovered supernatant (50  $\mu$ L) was analyzed by HPLC [TSK-GEL Amide-80 column 5  $\mu$ m (4.6 mm I.D.  $\times$  25 cm); mobile phase: CH<sub>3</sub>CN/ddH<sub>2</sub>O; linear gradients: 98:2 to 90:10 over 10 min and 90:10 to 65:35 over 10 min; flow rate: 1.0 mL/min; temperature: 40°C; detection: 284 nm].

#### **Competitive glycohydrolysis assay of synthetic trimannosides in the ER fraction (Figure 5 and 9).**

Reaction mixtures (25  $\mu$ L) contained the ER fraction (3 mg/mL), TritonX-100 (0.6%), CaCl<sub>2</sub> (10 mM), HEPES (10 mM, pH 7.4) and [**A3** (250  $\mu$ M), **B3** (250  $\mu$ M), **C3** (250  $\mu$ M) and **D2** (50  $\mu$ M)] or [**A3** (250  $\mu$ M), **B3** (250  $\mu$ M) and **D2** (50  $\mu$ M)] or [**A3** (250  $\mu$ M), **C3** (250  $\mu$ M) and **D2** (50  $\mu$ M)] or [**B3** (250  $\mu$ M), **C3** (250  $\mu$ M) and **D2** (50  $\mu$ M)]. The mixtures were incubated at 37°C for 1, 2, 4, 6 and 8 h. After incubation, CH<sub>3</sub>CN (45  $\mu$ L) and ddH<sub>2</sub>O (42  $\mu$ L) were added to the mixture (3  $\mu$ L) to stop enzymatic reaction. The samples were centrifuged

(20,000 × g, 4°C, 20 min) and the recovered supernatant (50 µL) was analyzed by HPLC [TSK-GEL Amide-80 column 5 µm (4.6 mm I.D. × 25 cm); mobile phase: CH<sub>3</sub>CN/ddH<sub>2</sub>O; linear gradients: 98:2 to 90:10 over 10 min and 90:10 to 65:35 over 10 min; flow rate: 1.0 mL/min; temperature: 40°C; detection: 284 nm].

#### **Influence of A2 on the hydrolysis of B3/C3 mixture in the ER fraction (Figure S4).**

Reaction mixtures (25 µL) contained the ER fraction (3 mg/mL), TritonX-100 (0.6%), CaCl<sub>2</sub> (10 mM), HEPES (10 mM, pH 7.4) and [B3 (250 µM), C3 (250 µM), A2 (250 µM) and D2 (50 µM)]. The mixtures were incubated at 37°C for 1, 2, 4, 6 and 8 h. After incubation, CH<sub>3</sub>CN (45 µL) and ddH<sub>2</sub>O (42 µL) were added to the mixture (3 µL) to stop enzymatic reaction. The samples were centrifuged (20,000 × g, 4°C, 20 min) and the recovered supernatant (50 µL) was analyzed by HPLC [TSK-GEL Amide-80 column 5 µm (4.6 mm I.D. × 25 cm); mobile phase: CH<sub>3</sub>CN/ddH<sub>2</sub>O; linear gradients: 98:2 to 90:10 over 10 min and 90:10 to 65:35 over 10 min; flow rate: 1.0 mL/min; temperature: 40°C; detection: 284 nm].

#### **Glycohydrolysis assay of A2 in the ER fraction (Figure 7 and 8).**

Reaction mixtures (25 µL) contained ER fraction (3 mg/mL), TritonX-100 (0.6%), CaCl<sub>2</sub> (10 mM), HEPES (10 mM, pH 7.4), and A2 (250 µM) or A3 (250 µM). The mixtures were incubated for 1, 2, 4, 6 and 8 h at 37°C. After incubation, CH<sub>3</sub>CN (45 µL) and ddH<sub>2</sub>O (42 µL) were added to the mixture (3 µL) to stop enzymatic reaction. The samples were centrifuged (20,000 × g, 4°C, 20 min) and the recovered supernatant (50 µL) was analyzed by HPLC [TSK-GEL Amide-80 column 5 µm (4.6 mm I.D. × 25 cm); mobile phase: CH<sub>3</sub>CN/ddH<sub>2</sub>O; linear gradients: 98:2 to 90:10 over 10 min and 90:10 to 65:35 over 10 min; flow rate: 1.0 mL/min; temperature: 40°C; detection: 284 nm].

#### **Competitive glycohydrolysis assay of natural A3, B3 or C3 with unnatural D3 in the ER fraction (Figure 10).**

Reaction mixtures (20 µL) contained ER fraction (3 mg/mL), TritonX-100 (0.6%), CaCl<sub>2</sub> (10 mM), HEPES (10 mM, pH 7.4) and [A3 (250 µM) and D3 (250 µM)] or [B3 (250 µM) and D3 (250 µM)] or [C3 (250 µM) and D3 (250 µM)]. The mixtures were incubated for 1, 2, 4, 6 and 8 h at 37°C. After incubation, CH<sub>3</sub>CN (45 µL) and ddH<sub>2</sub>O (42 µL) were added to the mixture (3 µL) to stop enzymatic reaction. The samples were centrifuged (20,000 × g, 4°C, 20 min) and the recovered supernatant (50 µL) was analyzed by HPLC [TSK-GEL Amide-80 column 5 µm (4.6 mm I.D. × 25 cm); mobile phase: CH<sub>3</sub>CN/ddH<sub>2</sub>O; linear gradients: 98:2 to 90:10 over 10 min and 90:10 to 65:35 over 10 min; flow rate: 1.0 mL/min; temperature: 40°C; detection: 284 nm].

#### **References**

- (1) I. Cumpstey, A. J. Fairbanks and J. J. Redgrave, *Org Lett.*, 2001, **3**, 2371-2374.
- (2) K. J. Doores, Z. Fulton, V. Hong, M. K. Patel, C. N. Scanlan, M. R. Wormald, M. G. Finn, D. R. Burton, I. A. Wilson and B. G. Davis, *Proc. Nat. Acad. Sci. USA*, 2010, **107**, 17107-17112.
- (3) D. Tailer, V. Ferrières, K. Pekari and R. R. Schmidt, *Tetrahedron Lett.*, 1999, **40**, 679-682.
- (4) A. Ishiwata, H. Akao and Y. Ito, *Org Lett.*, 2006, **8**, 5525-5528.

- (5) K. J. Doores and B. G. Davis, *Org. Biol. Chem.*, 2008, **6**, 2692 – 2696.
- (6) T. Tanikawa, M. Fridman, W. Zhu, B. Faulk, I. C. Joseph, D. Kahne, B. K. Wagner and P. A. Clemons, *J. Am. Chem. Soc.*, 2009, **131**, 5075-5083.

## $^1\text{H}$ NMR & $^{13}\text{C}$ -NMR spectra for the novel compounds

Compound **6** ( $^1\text{H}$  NMR) in  $\text{CDCl}_3$

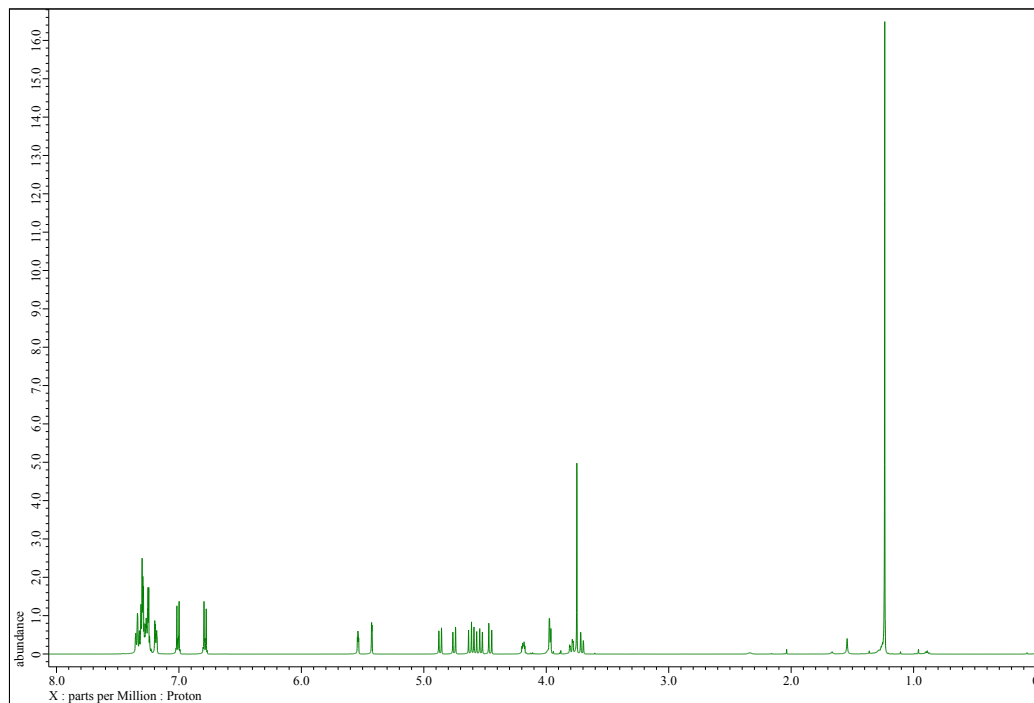

Compound **6** ( $^{13}\text{C}$  NMR) in  $\text{CDCl}_3$

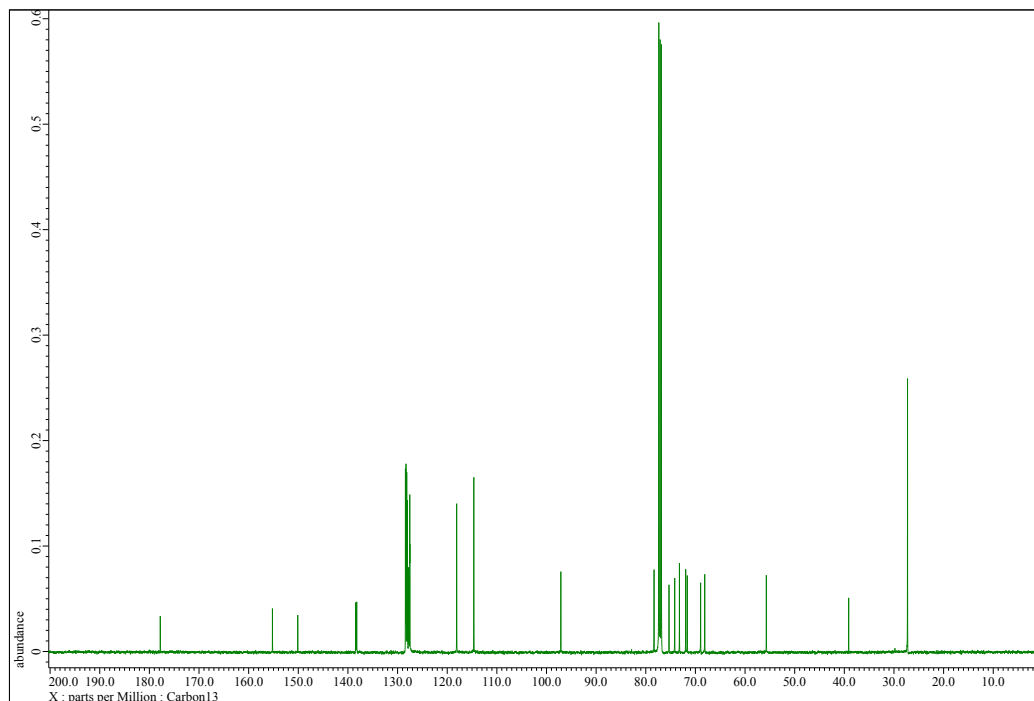

Compound **8** ( $^1\text{H}$  NMR) in  $\text{CDCl}_3$

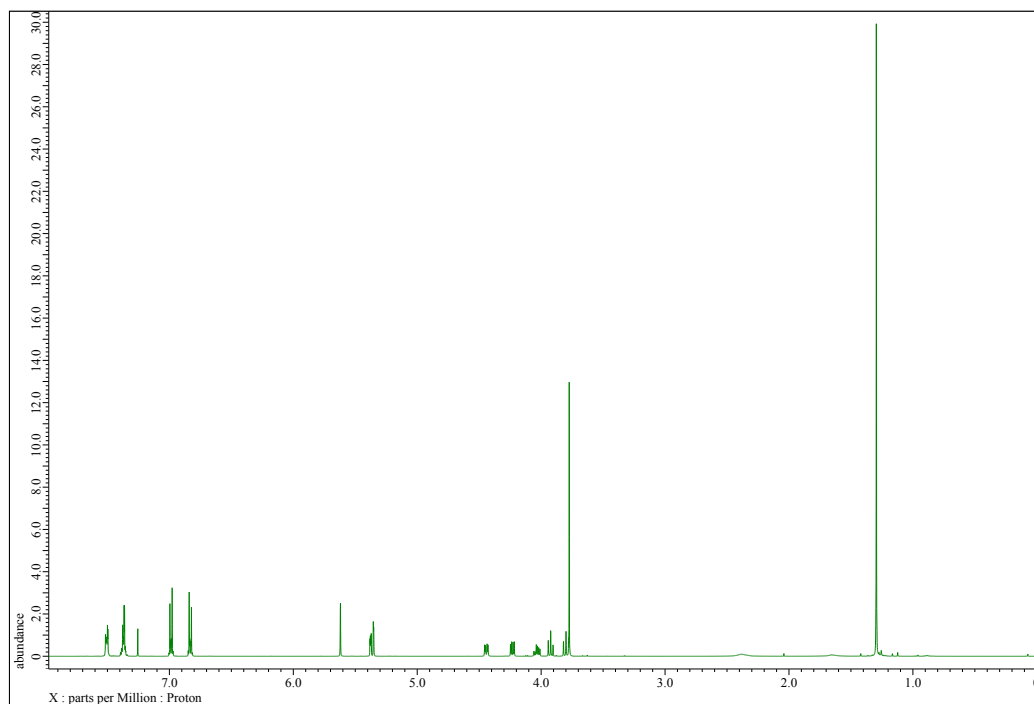

Compound **8** ( $^{13}\text{C}$  NMR) in  $\text{CDCl}_3$

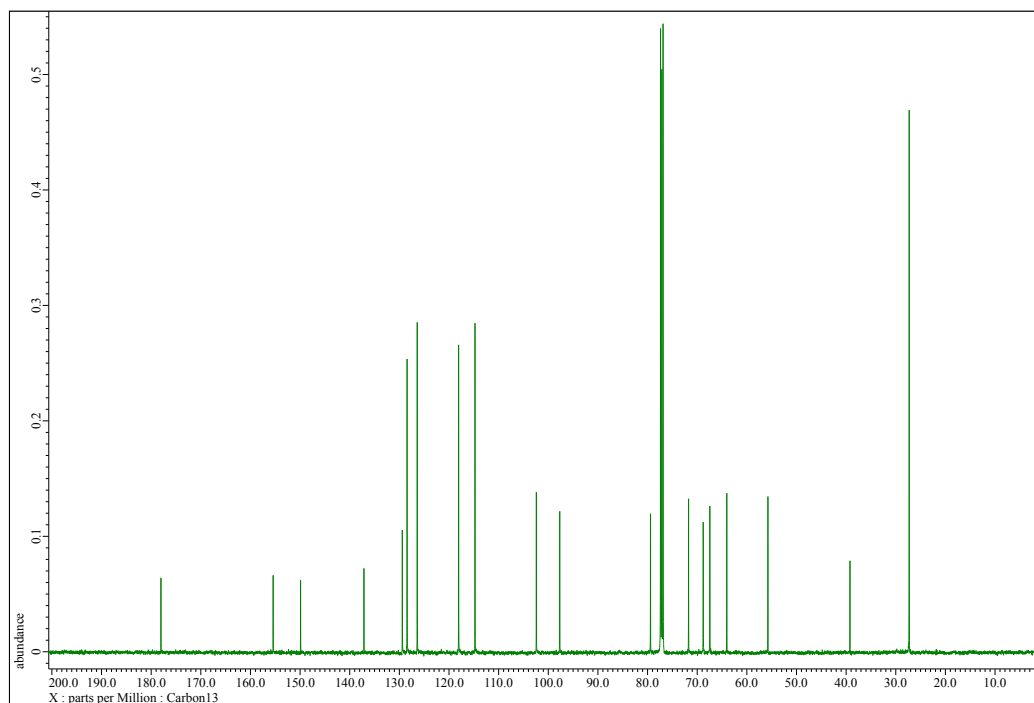

Compound **9** ( $^1\text{H}$  NMR) in  $\text{CDCl}_3$

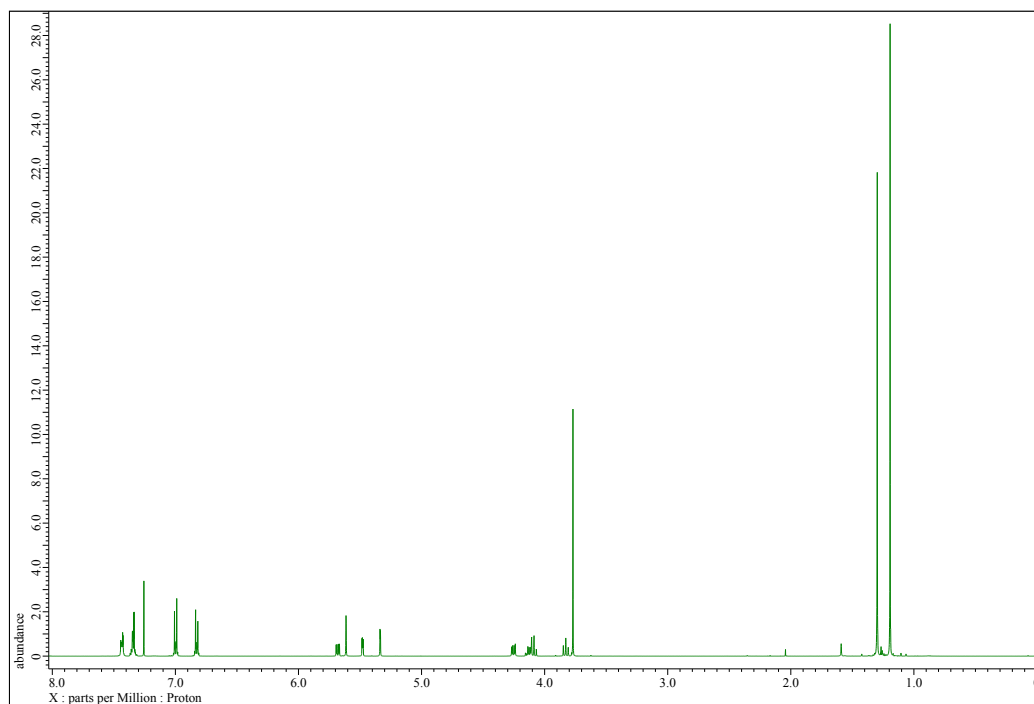

Compound **9** ( $^{13}\text{C}$  NMR) in  $\text{CDCl}_3$

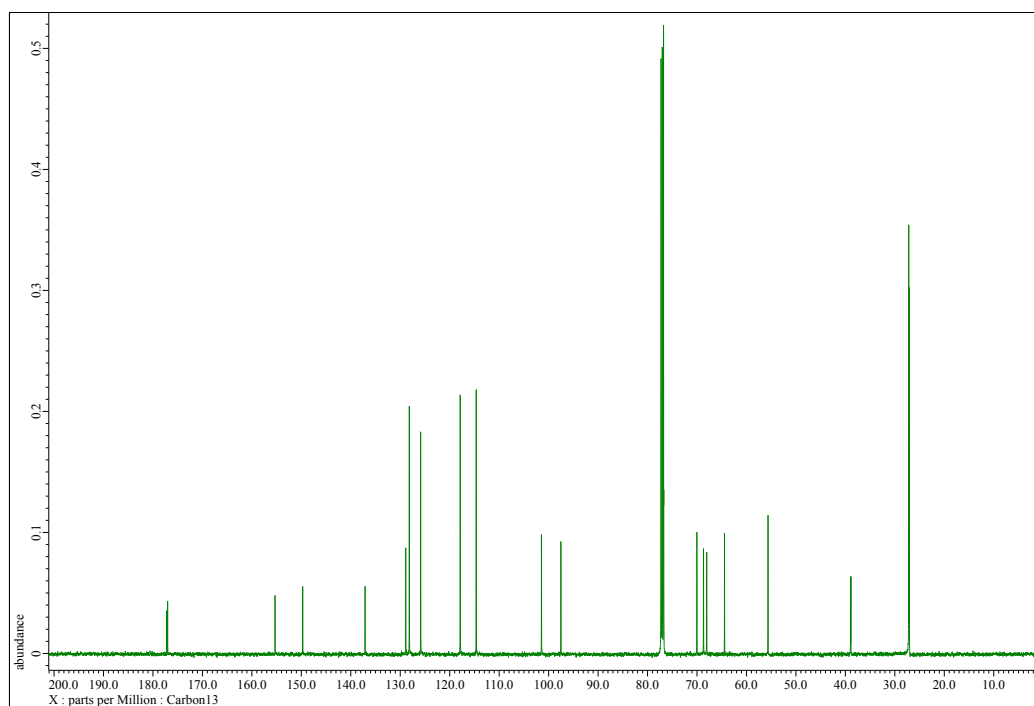

Compound **10** ( $^1\text{H}$  NMR) in  $\text{CDCl}_3$

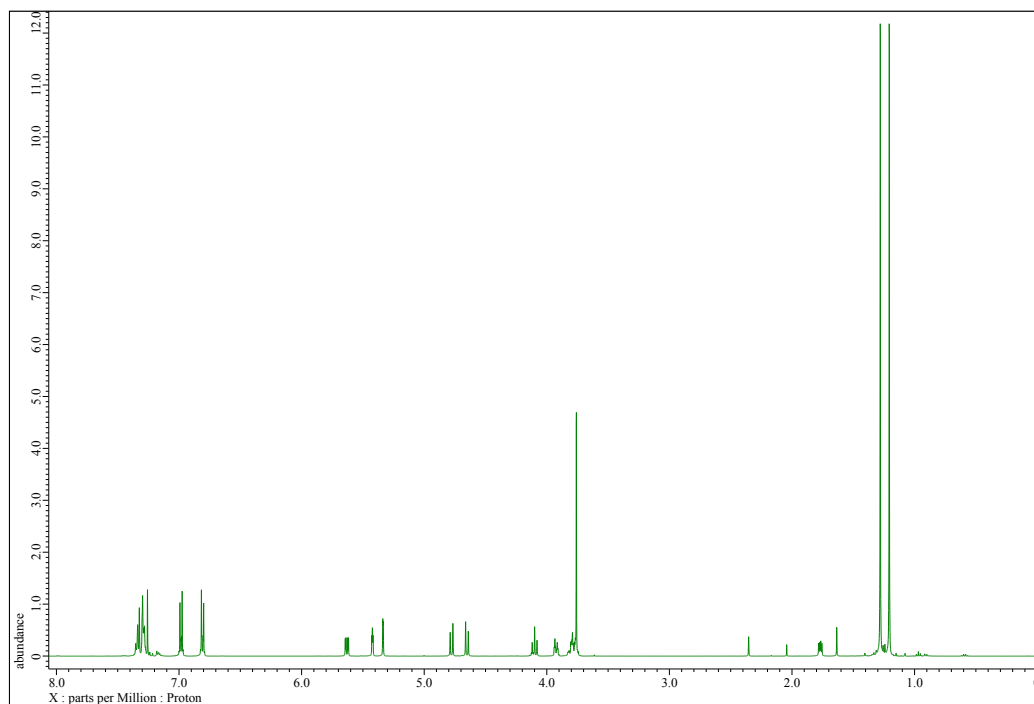

Compound **10** ( $^{13}\text{C}$  NMR) in  $\text{CDCl}_3$

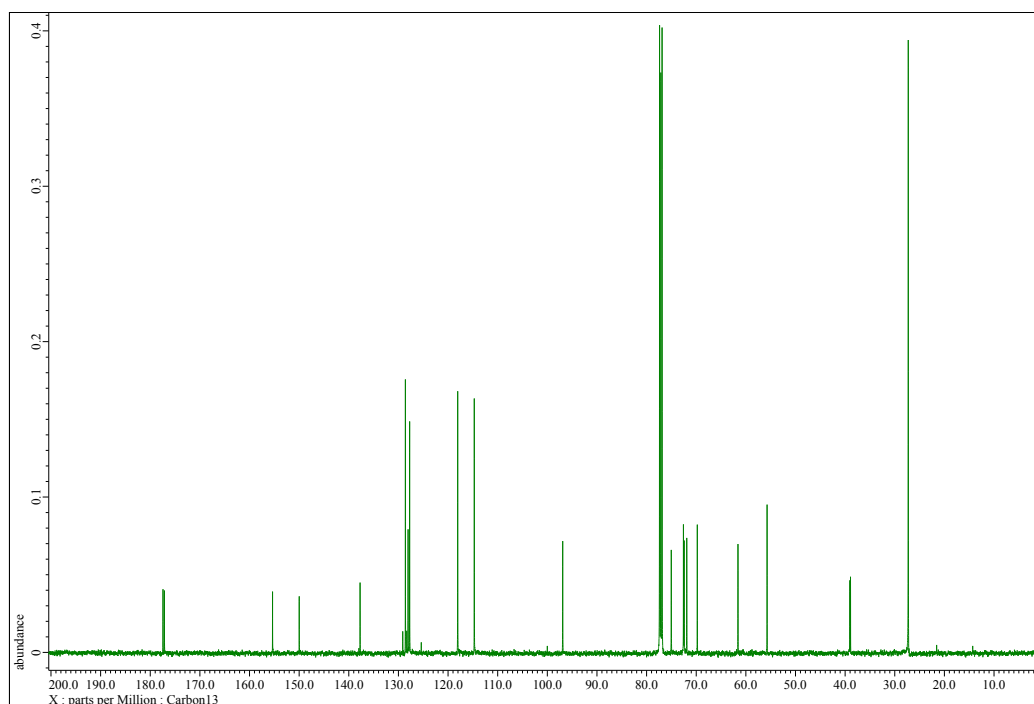

Compound **11** ( $^1\text{H}$  NMR) in  $\text{CDCl}_3$

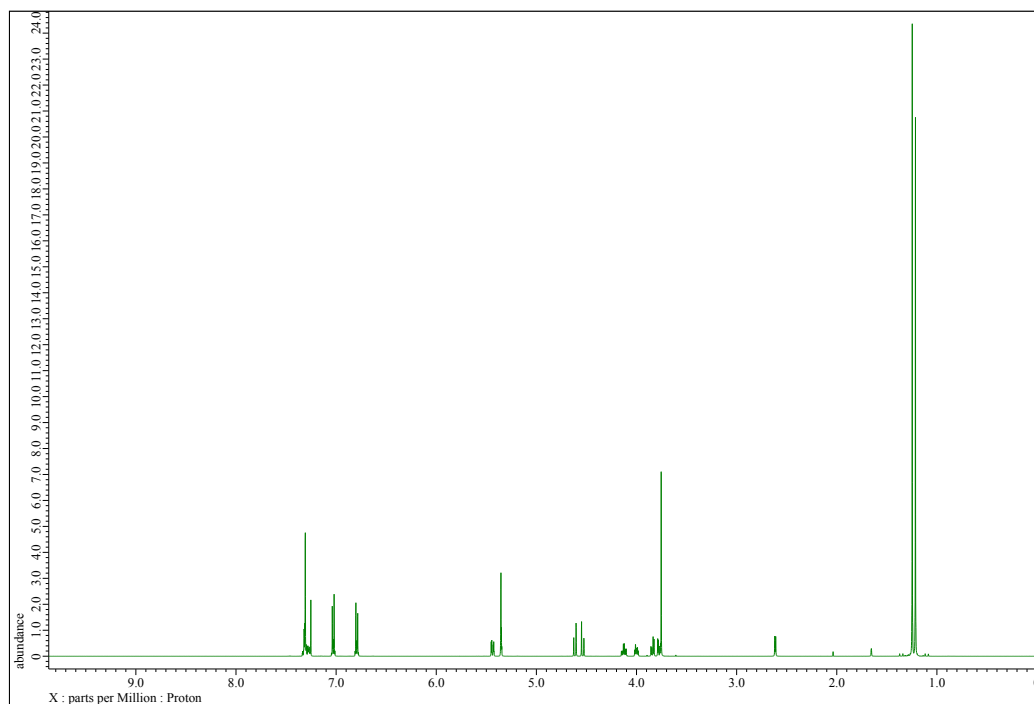

Compound **11** ( $^{13}\text{C}$  NMR) in  $\text{CDCl}_3$

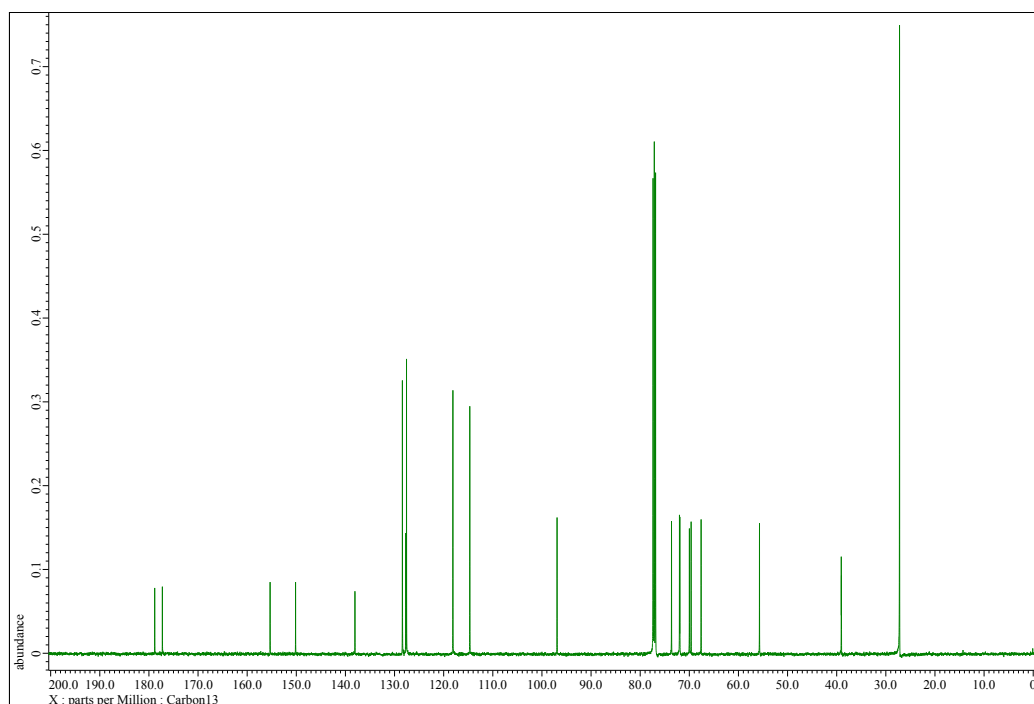

Compound **12** ( $^1\text{H}$  NMR) in  $\text{CDCl}_3$

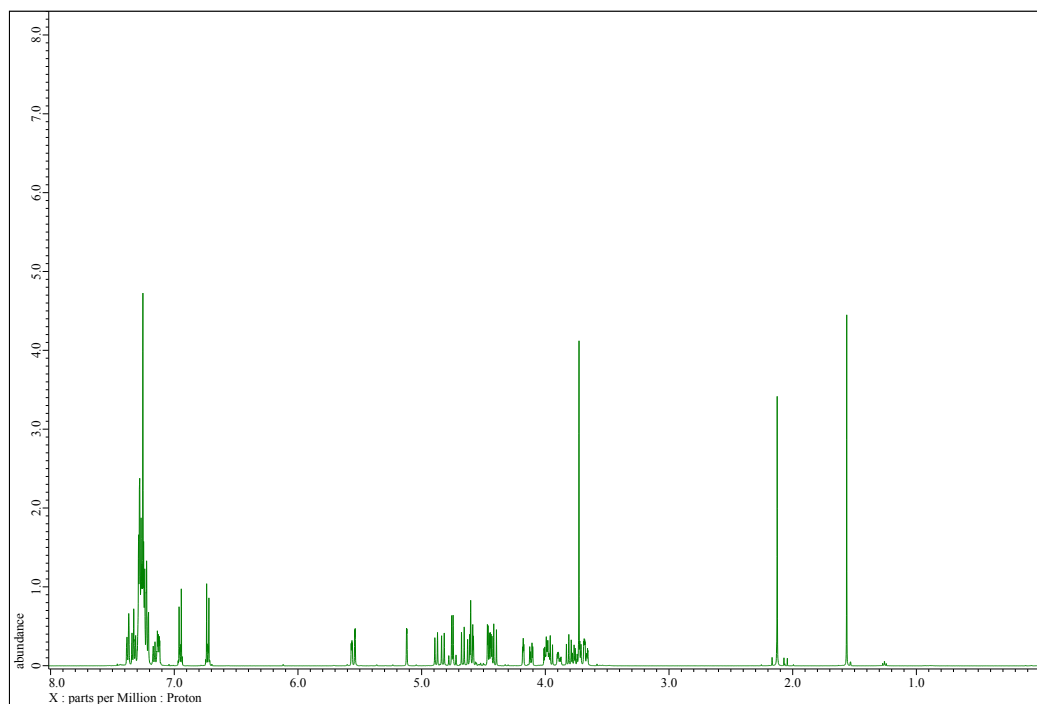

Compound **12** ( $^{13}\text{C}$  NMR) in  $\text{CDCl}_3$

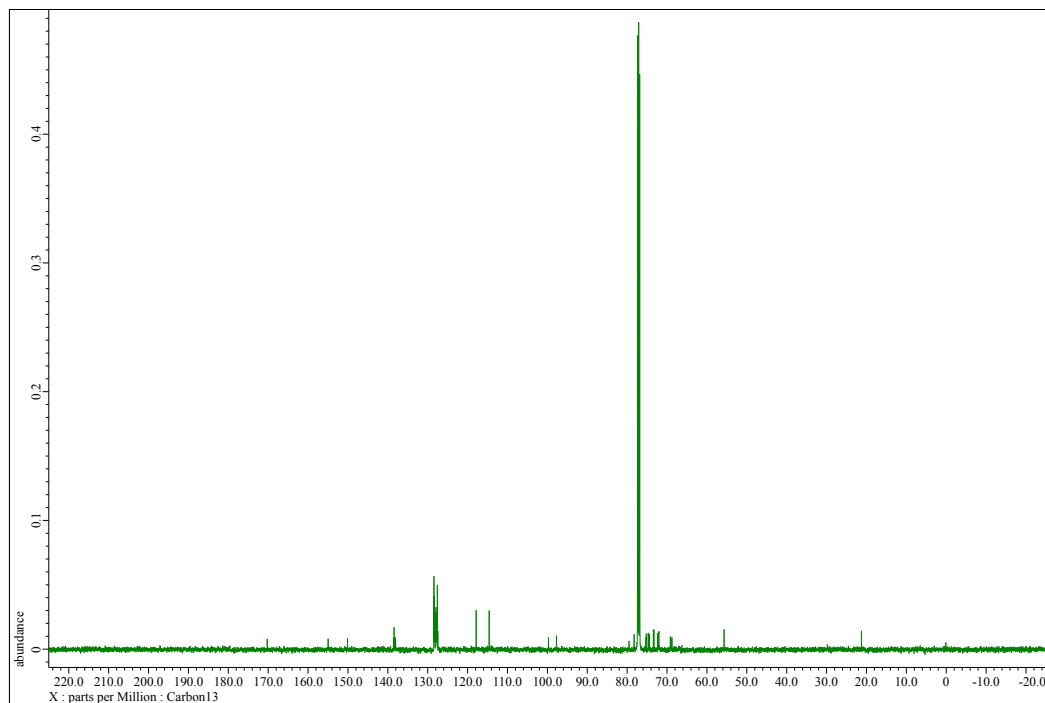

Compound **12** (Non-decoupling HMQC) in CDCl<sub>3</sub>

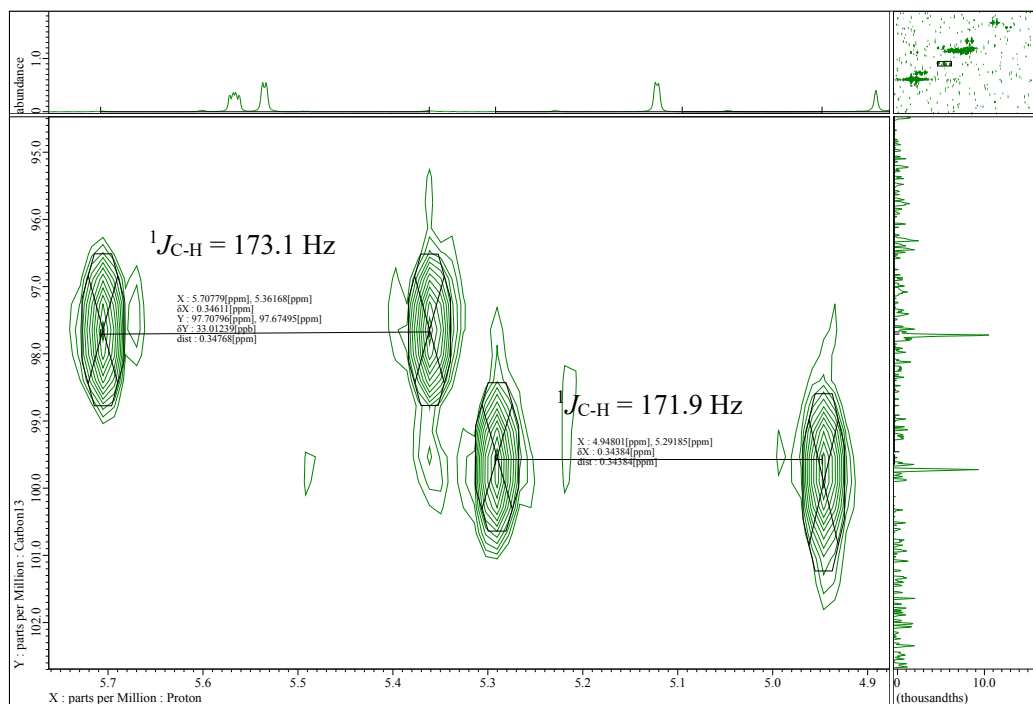

Compound **14** (<sup>1</sup>H NMR) in CDCl<sub>3</sub>

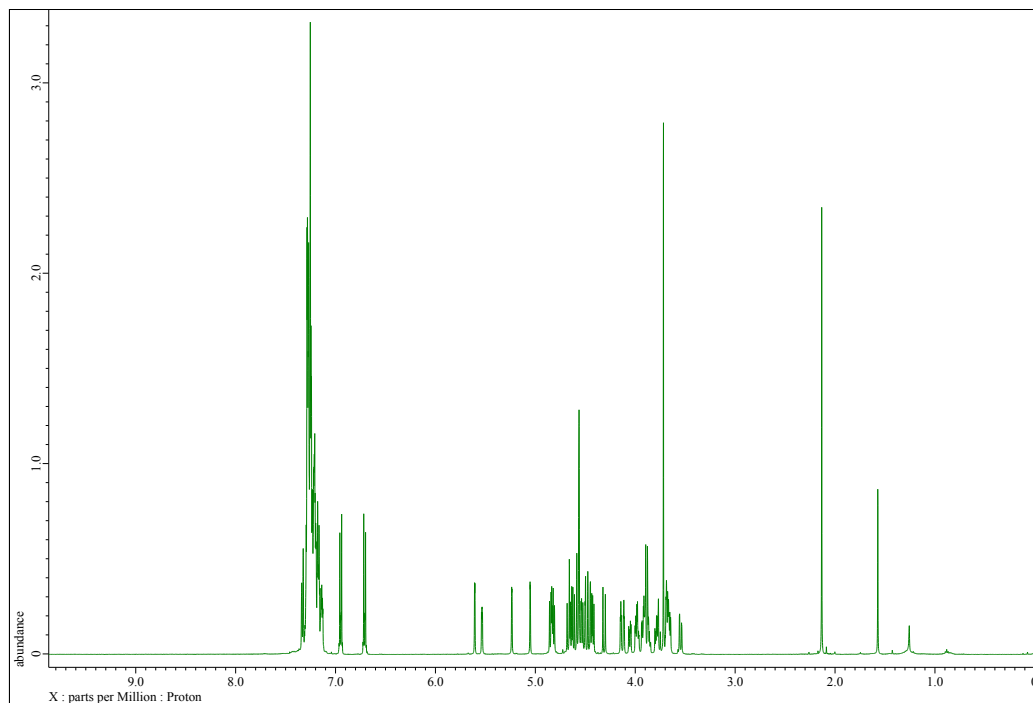

Compound **14** ( $^{13}\text{C}$  NMR) in  $\text{CDCl}_3$

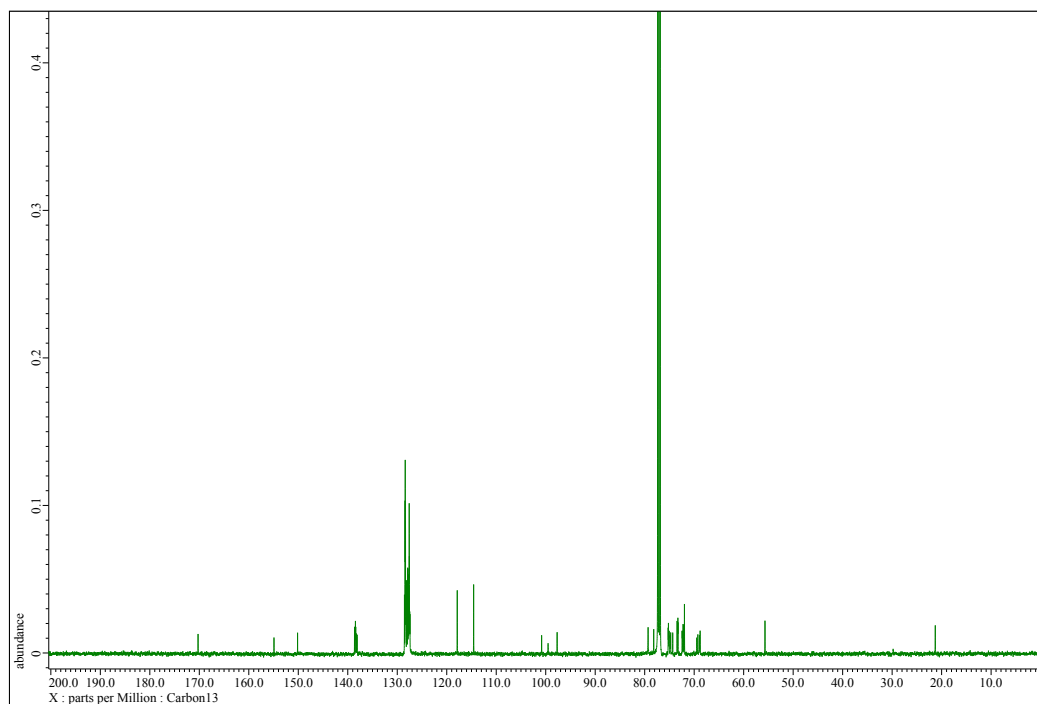

Compound **14** (Non-decoupling HMQC) in  $\text{CDCl}_3$

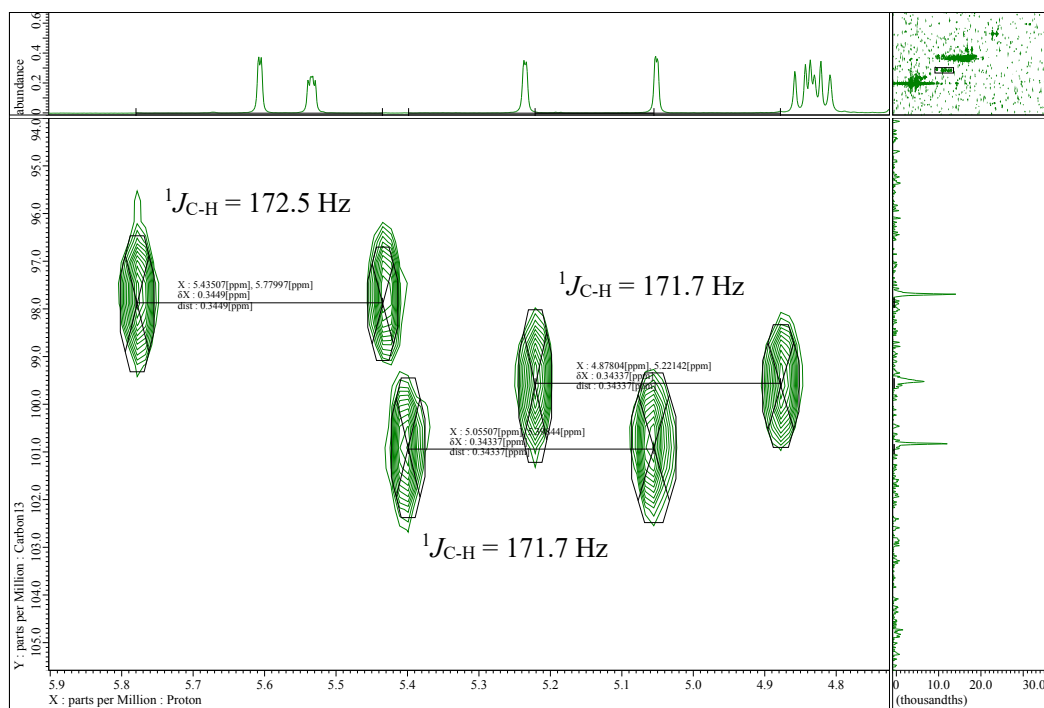

Compound **15** ( $^1\text{H}$  NMR) in  $\text{CDCl}_3$

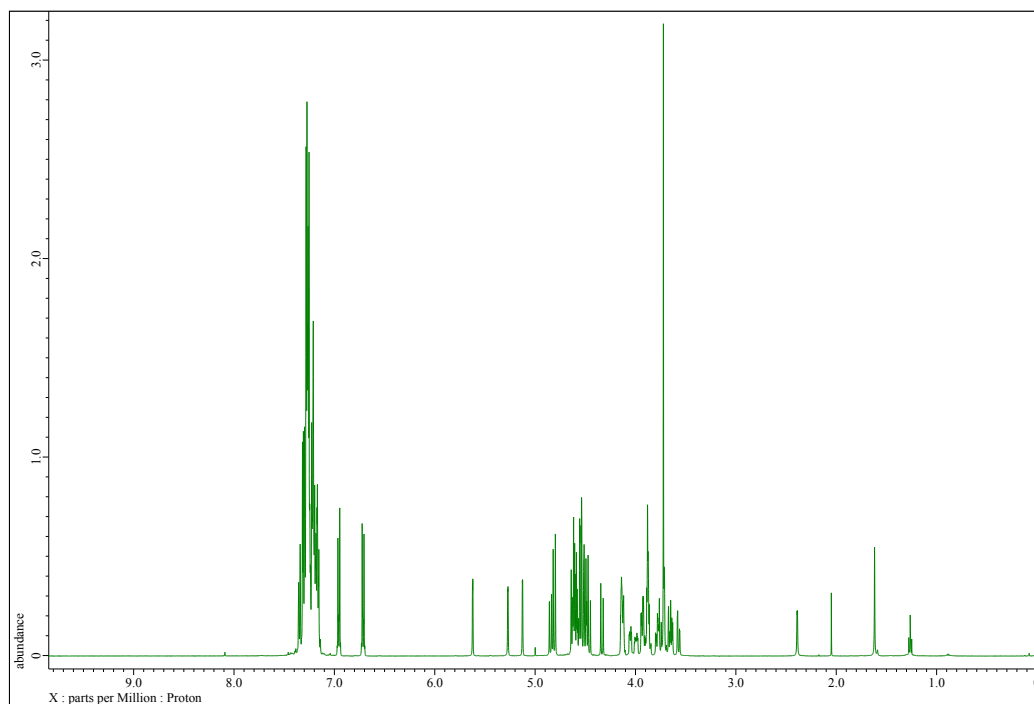

Compound **15** ( $^{13}\text{C}$  NMR) in  $\text{CDCl}_3$

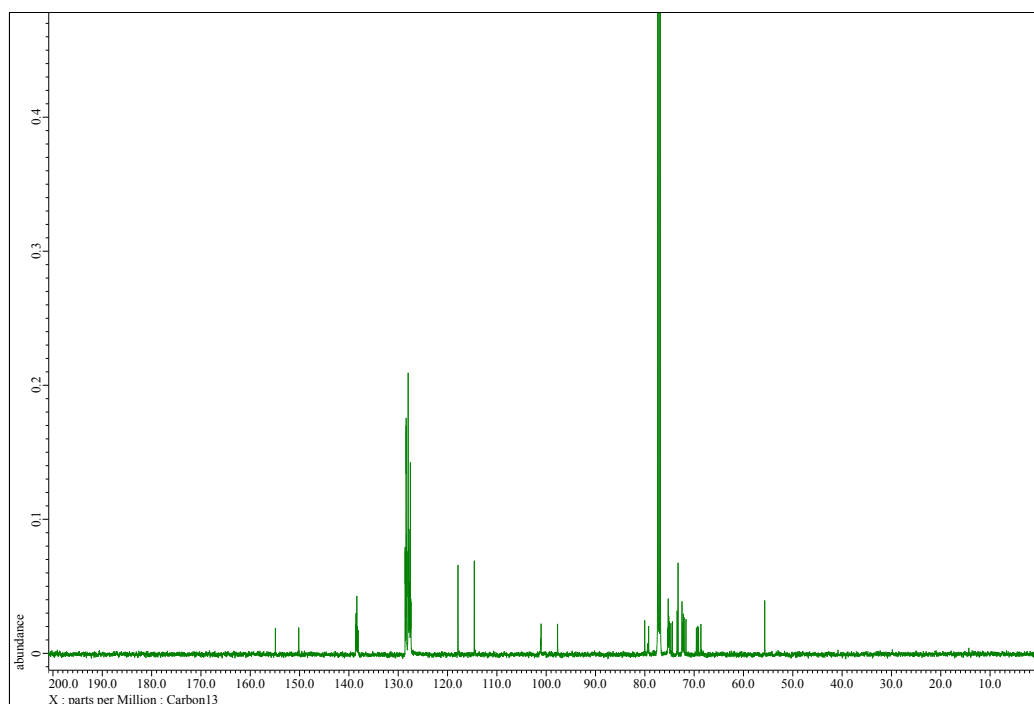

Compound **16** ( $^1\text{H}$  NMR) in  $\text{D}_2\text{O}$

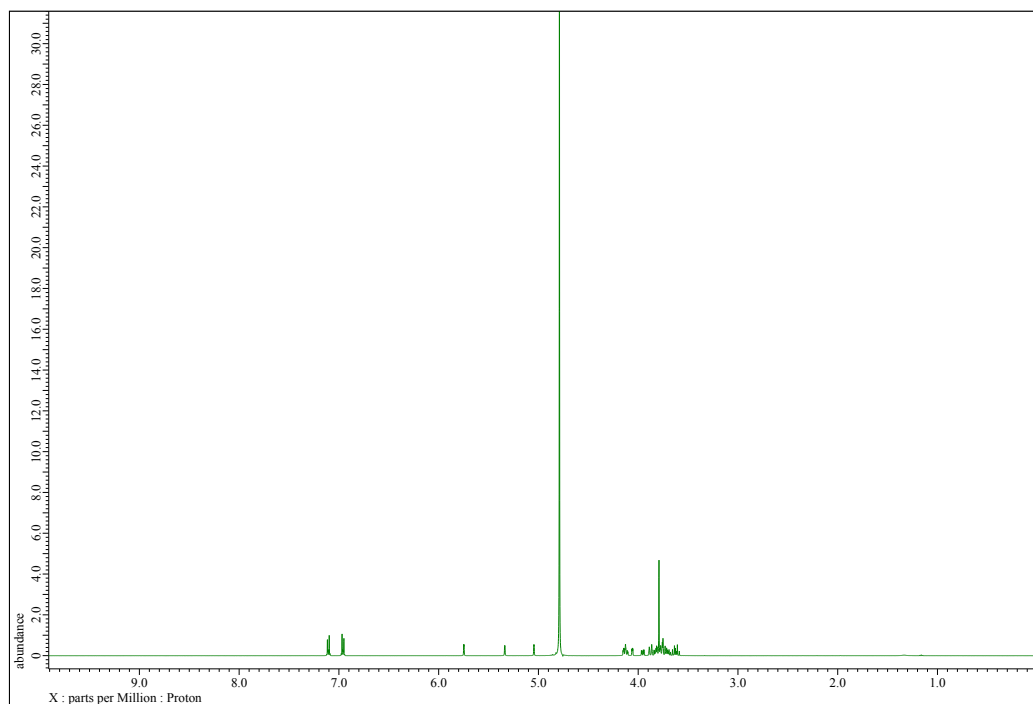

Compound **16** ( $^{13}\text{C}$  NMR) in  $\text{D}_2\text{O}$

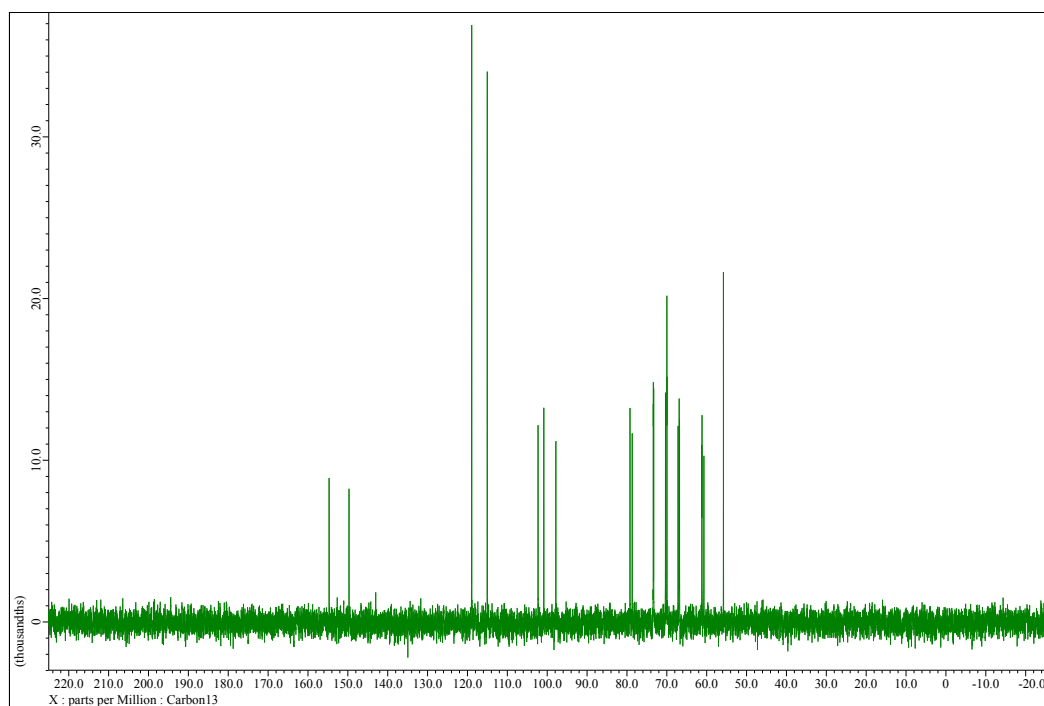

Compound **17** ( $^1\text{H}$  NMR) in  $\text{CDCl}_3$

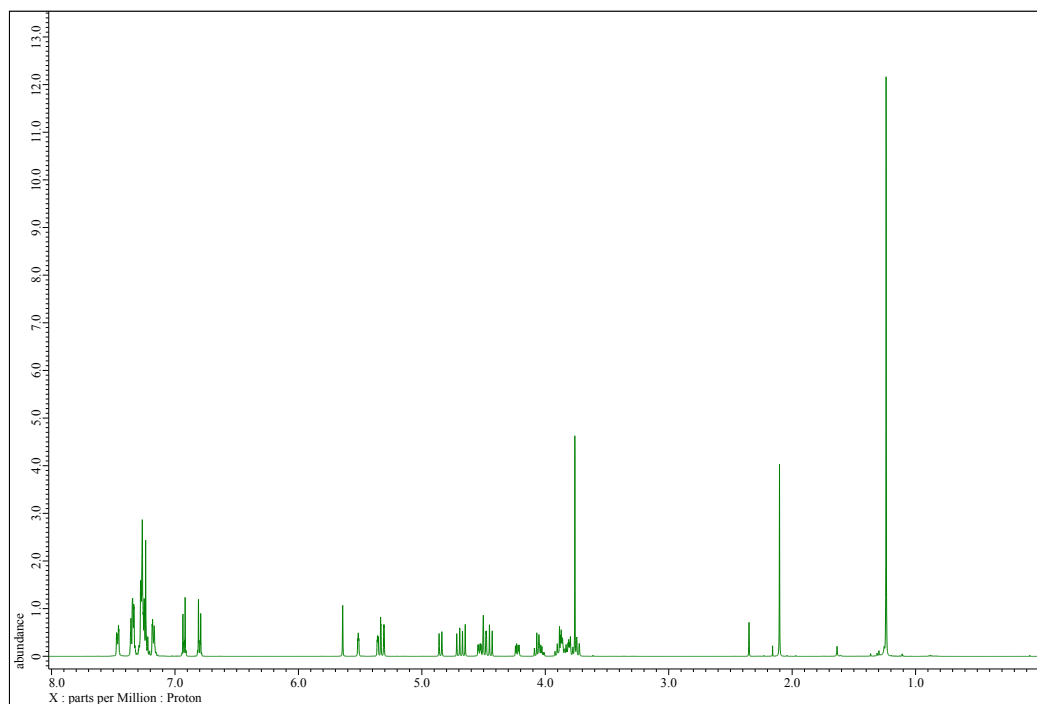

Compound **17** ( $^{13}\text{C}$  NMR) in  $\text{CDCl}_3$

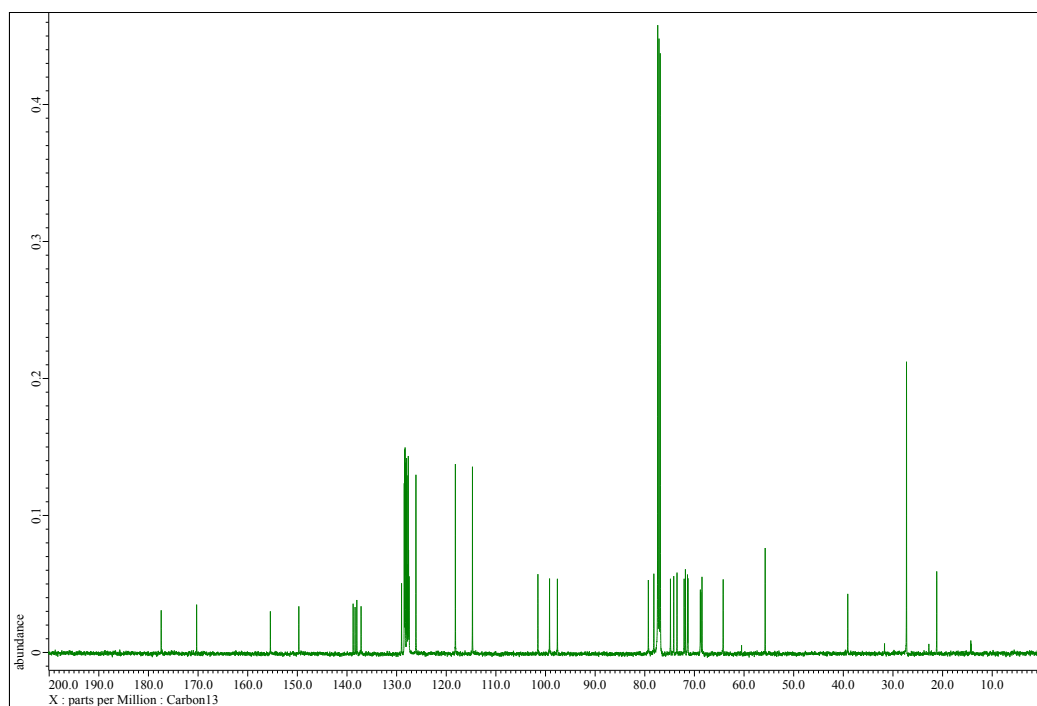

Compound **17** (Non-decoupling HMQC) in CDCl<sub>3</sub>

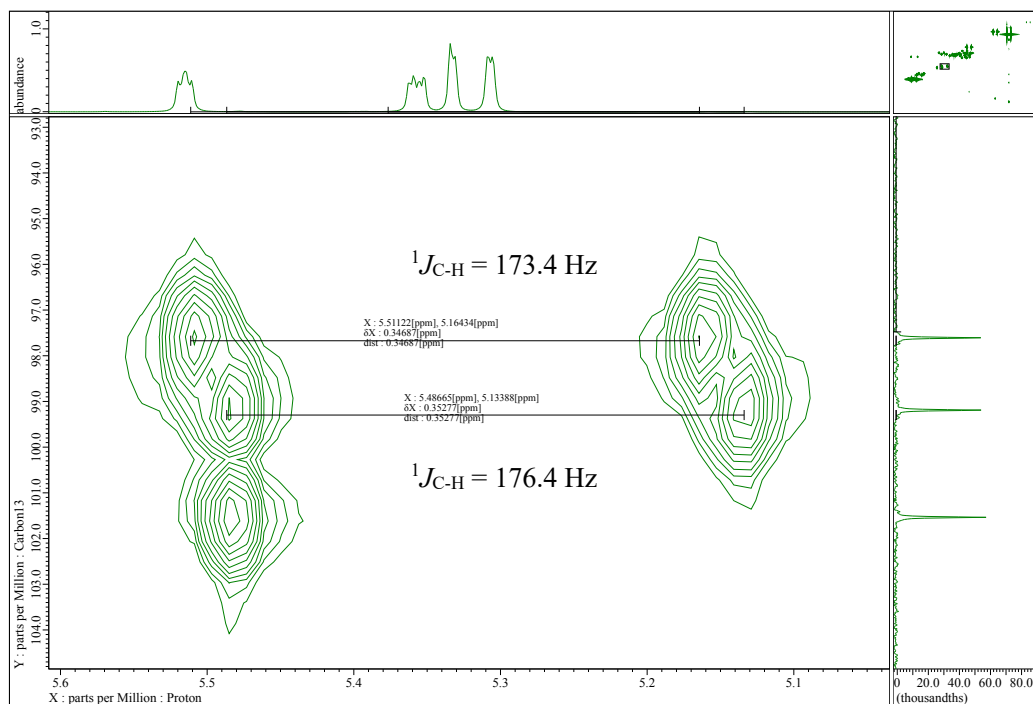

Compound **18** (<sup>1</sup>H NMR) in CDCl<sub>3</sub>

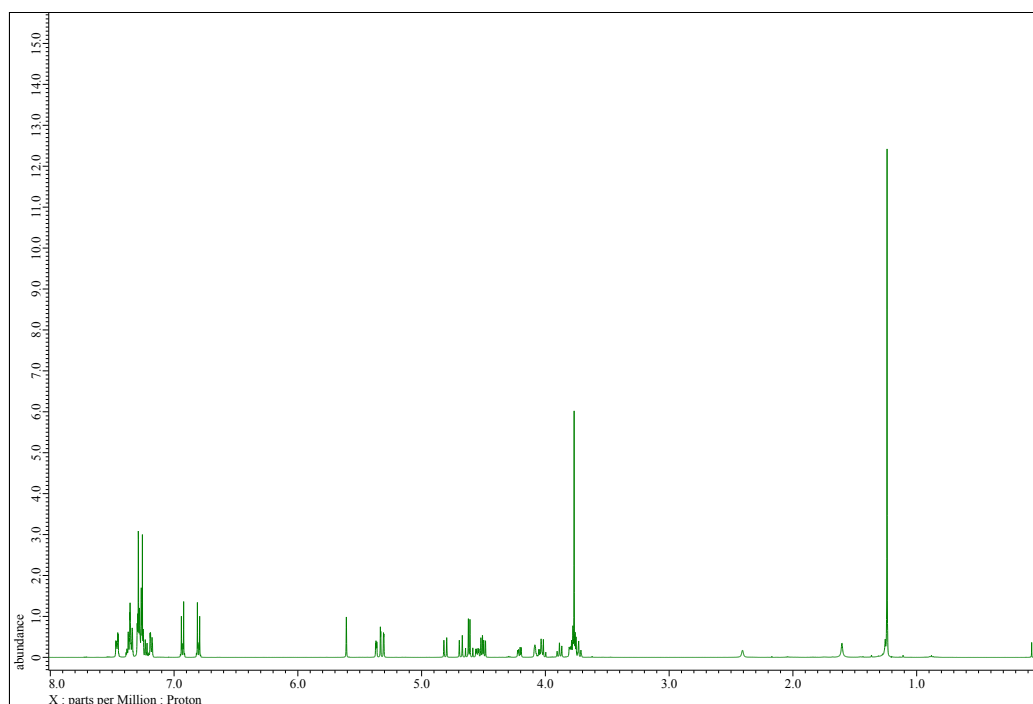

Compound **18** ( $^{13}\text{C}$  NMR) in  $\text{CDCl}_3$

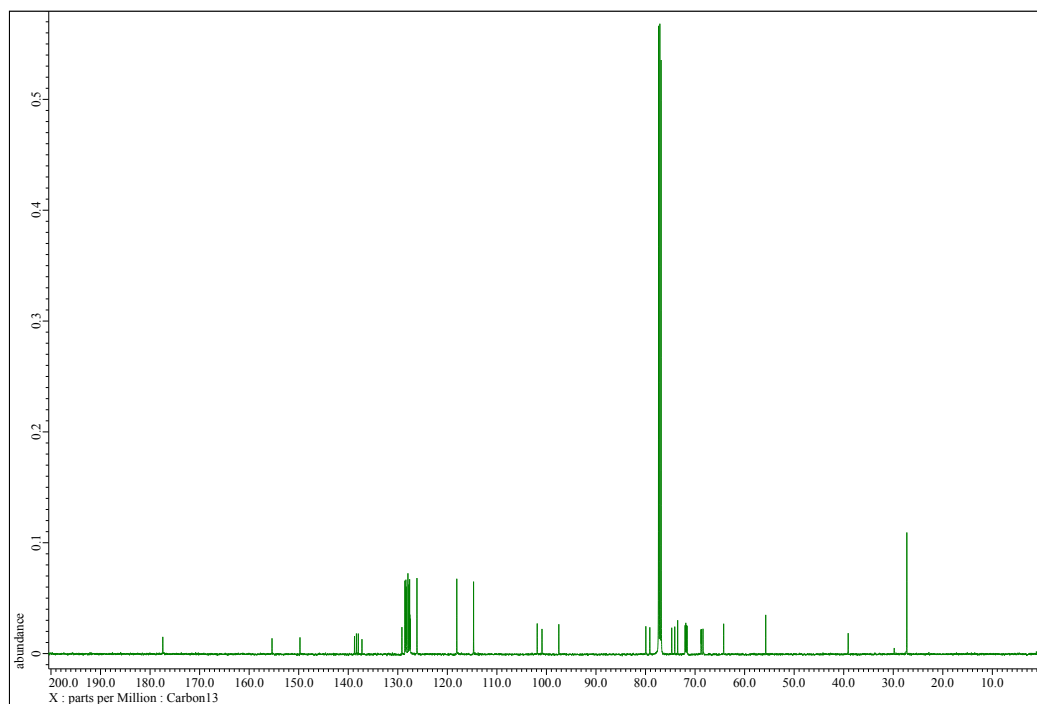

Compound **19** ( $^1\text{H}$  NMR) in  $\text{CDCl}_3$

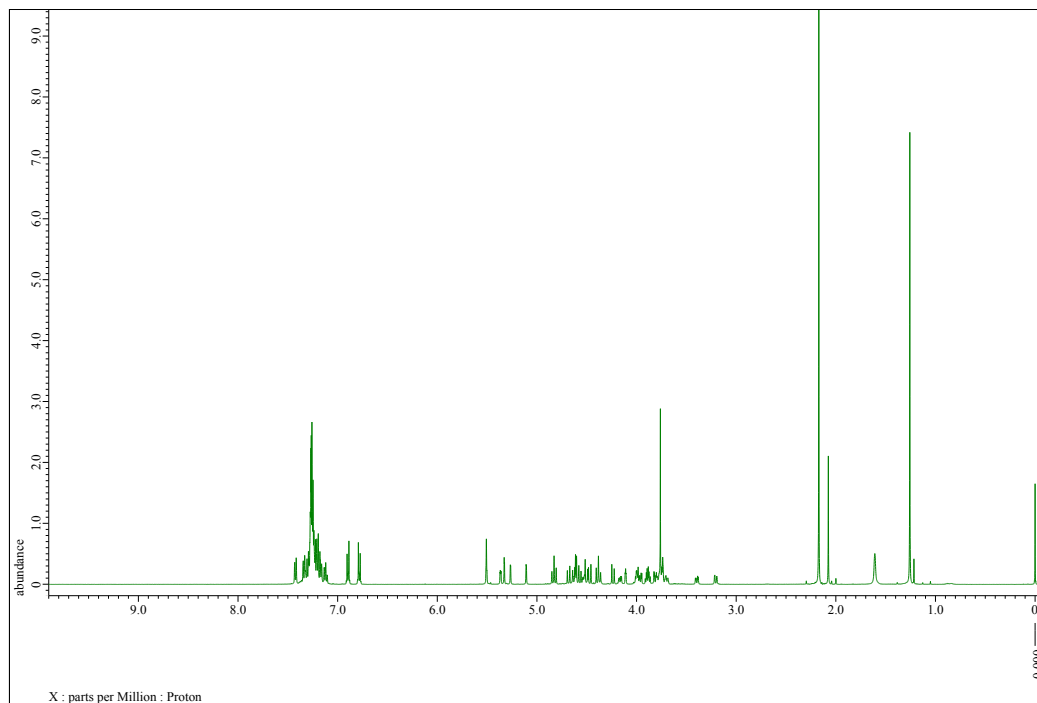

Compound **19** ( $^{13}\text{C}$  NMR) in  $\text{CDCl}_3$

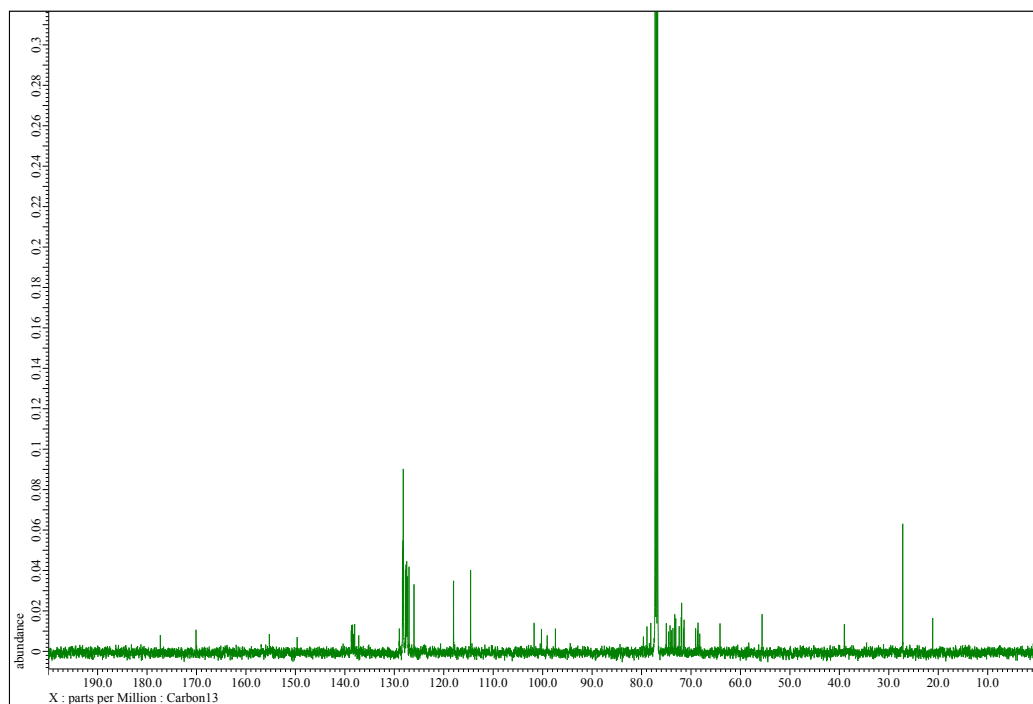

Compound **19** (Non-decoupling HMQC) in  $\text{CDCl}_3$

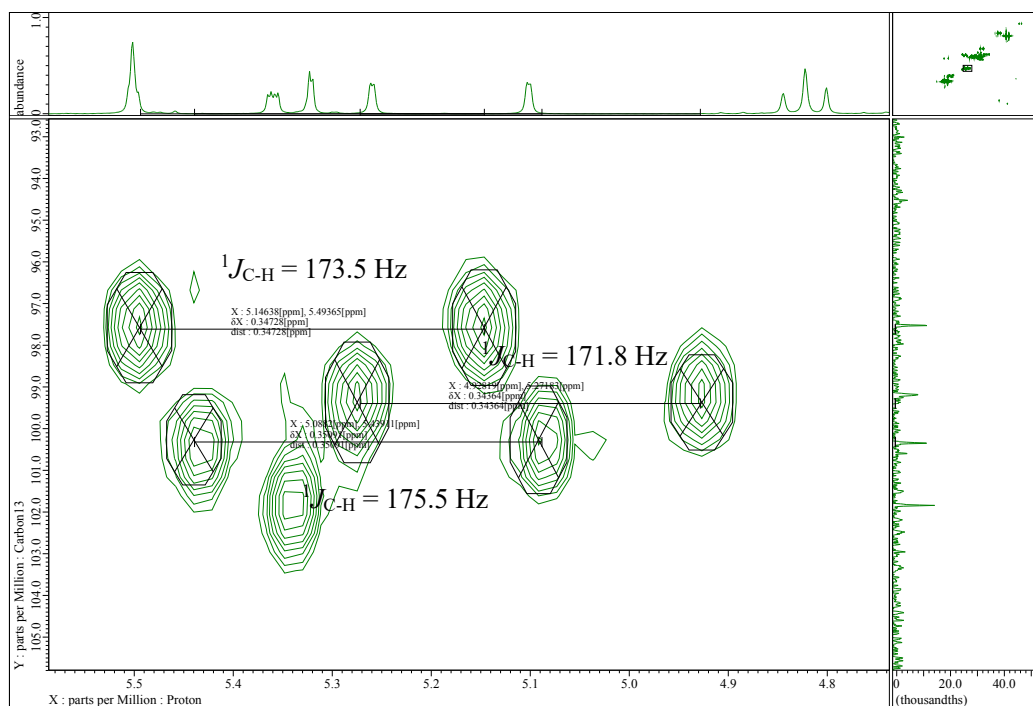

Compound **20** ( $^1\text{H}$  NMR) in  $\text{CDCl}_3$

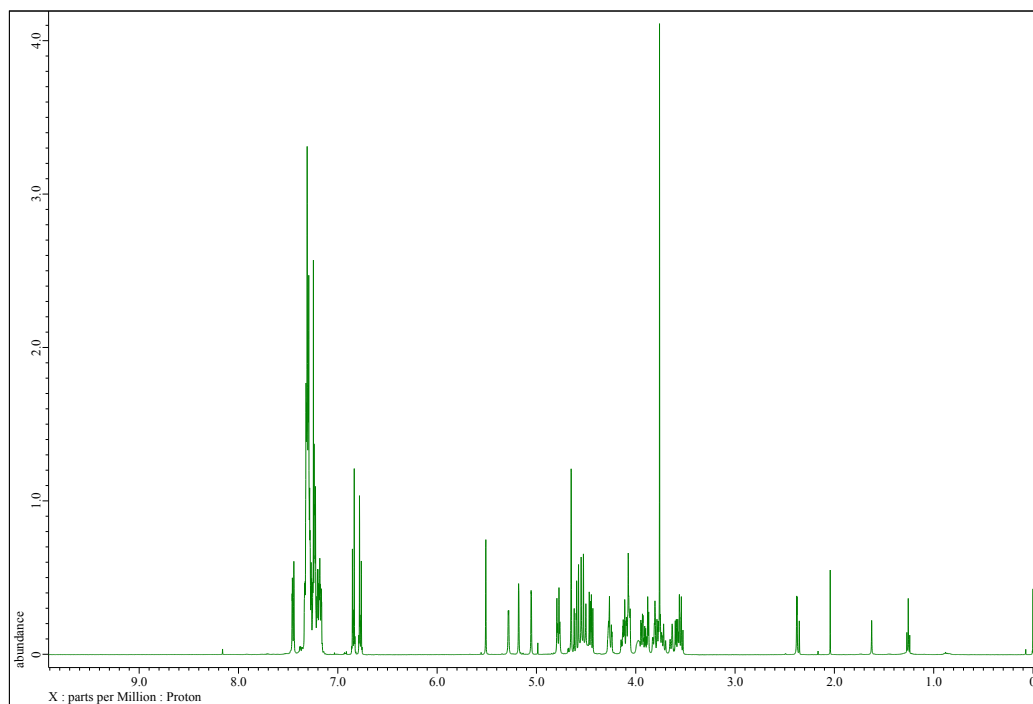

Compound **20** ( $^{13}\text{C}$  NMR) in  $\text{CDCl}_3$

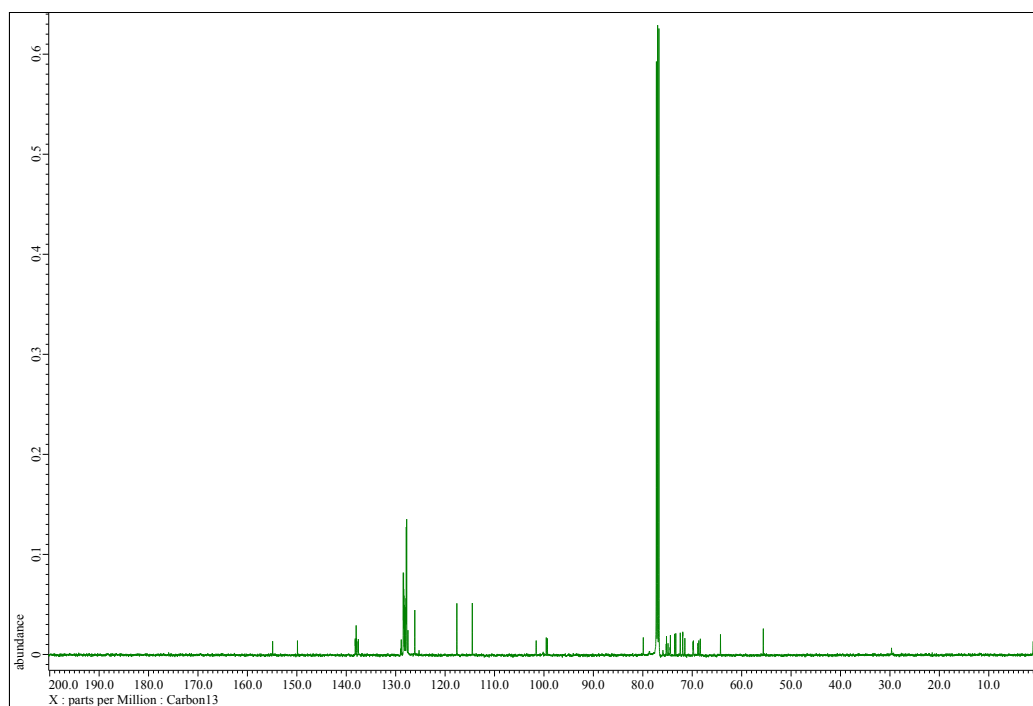

Compound **21** ( $^1\text{H}$  NMR) in  $\text{CDCl}_3$

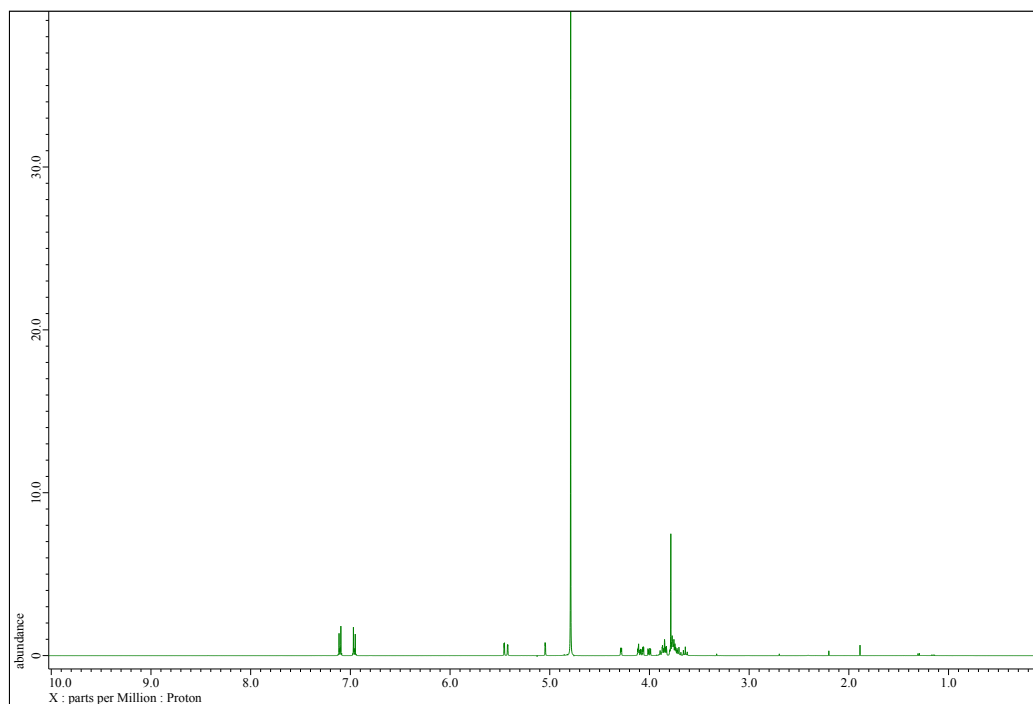

Compound **21** ( $^{13}\text{C}$  NMR) in  $\text{CDCl}_3$

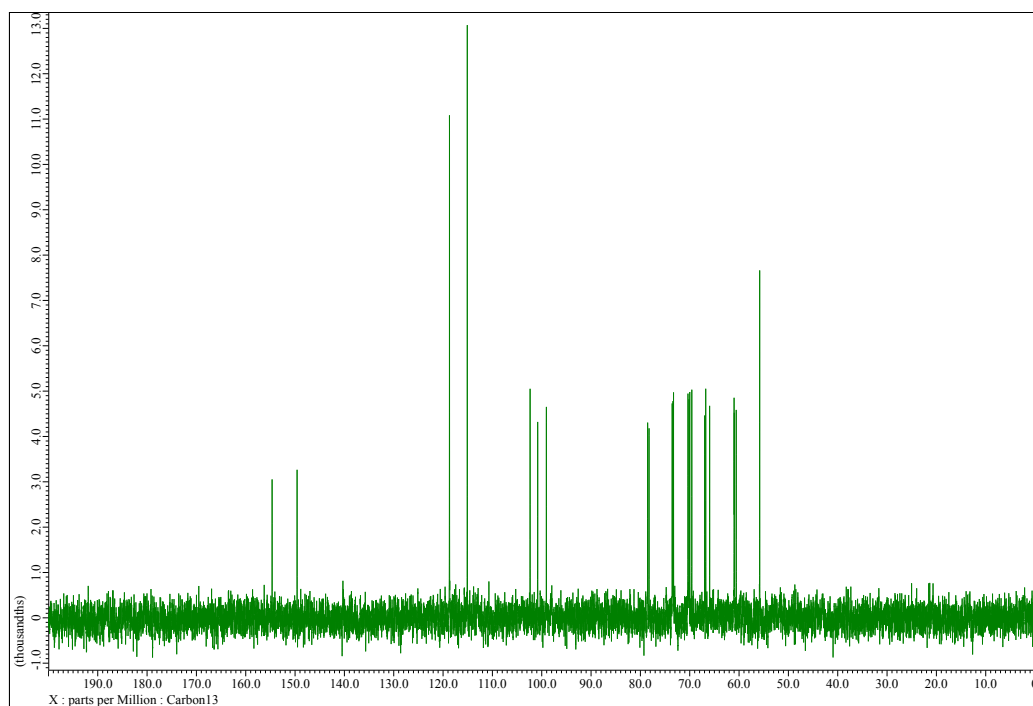

Compound **22** ( $^1\text{H}$  NMR) in  $\text{CDCl}_3$

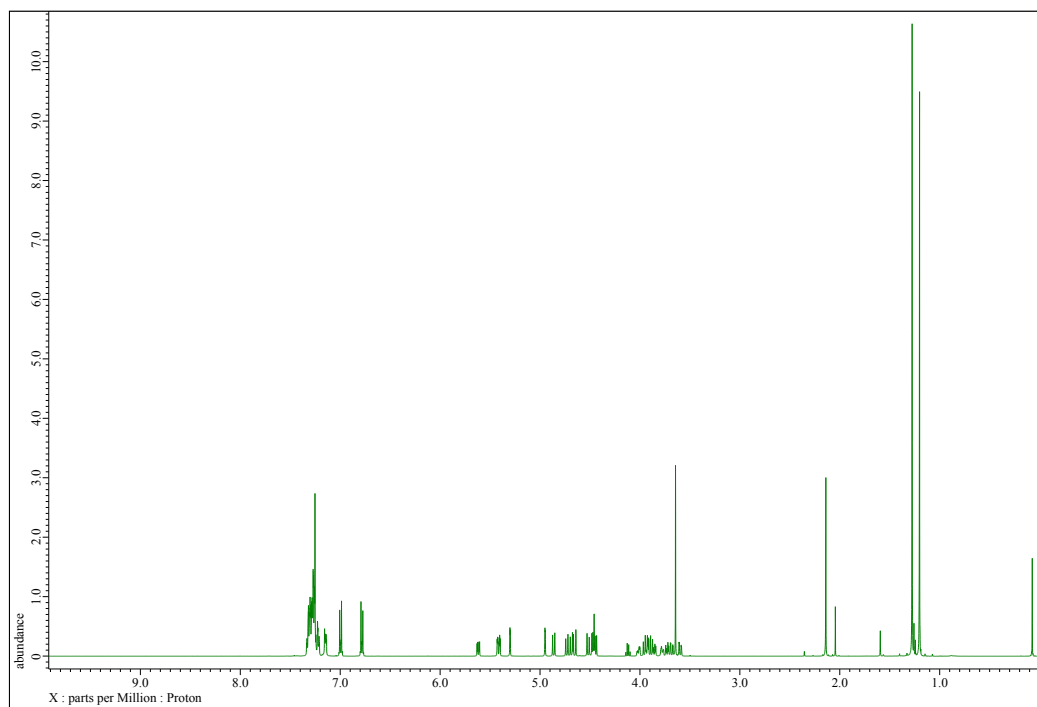

Compound **22** ( $^{13}\text{C}$  NMR) in  $\text{CDCl}_3$

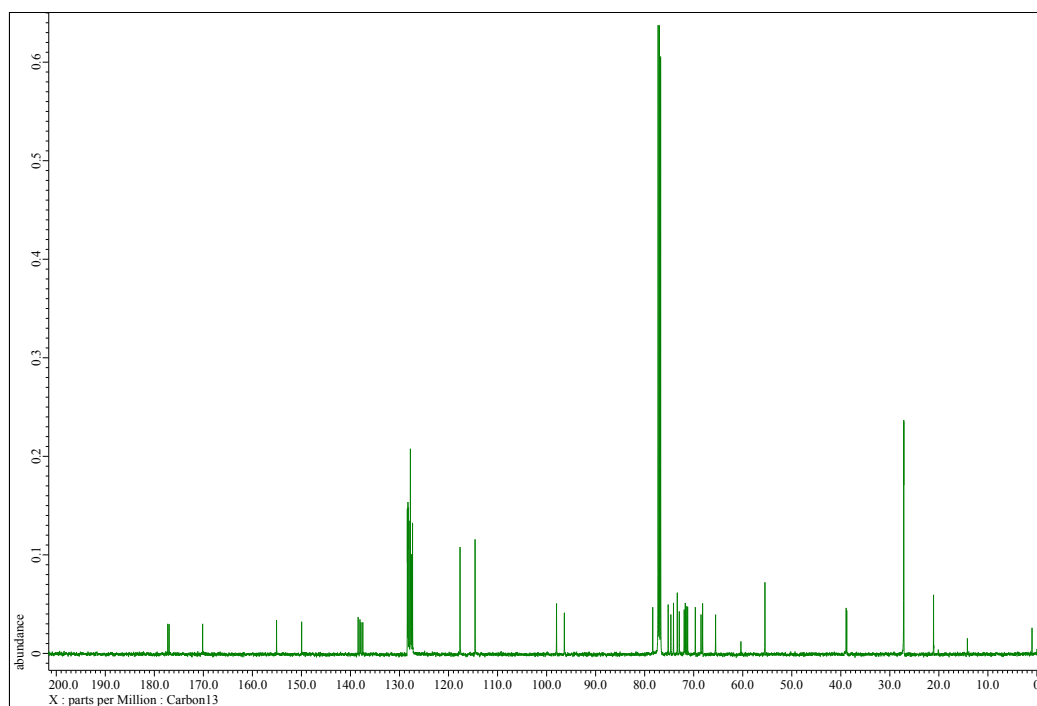

Compound **22** (Non-decoupling HMQC) in CDCl<sub>3</sub>

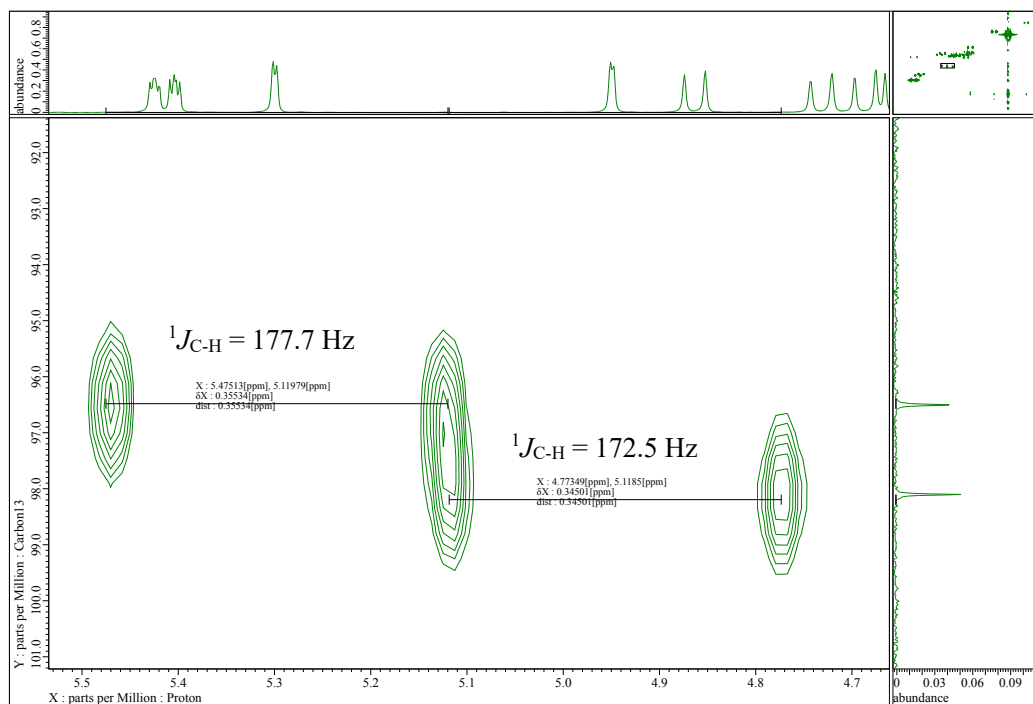

Compound **23** (<sup>1</sup>H NMR) in CDCl<sub>3</sub>

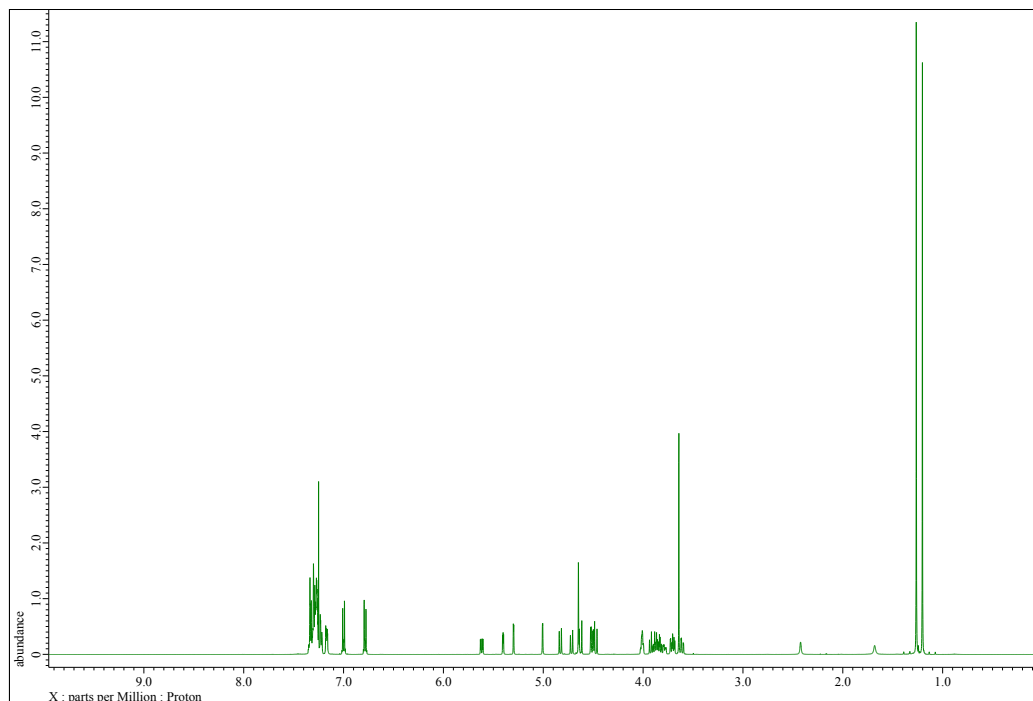

Compound **23** (<sup>13</sup>C NMR) in CDCl<sub>3</sub>

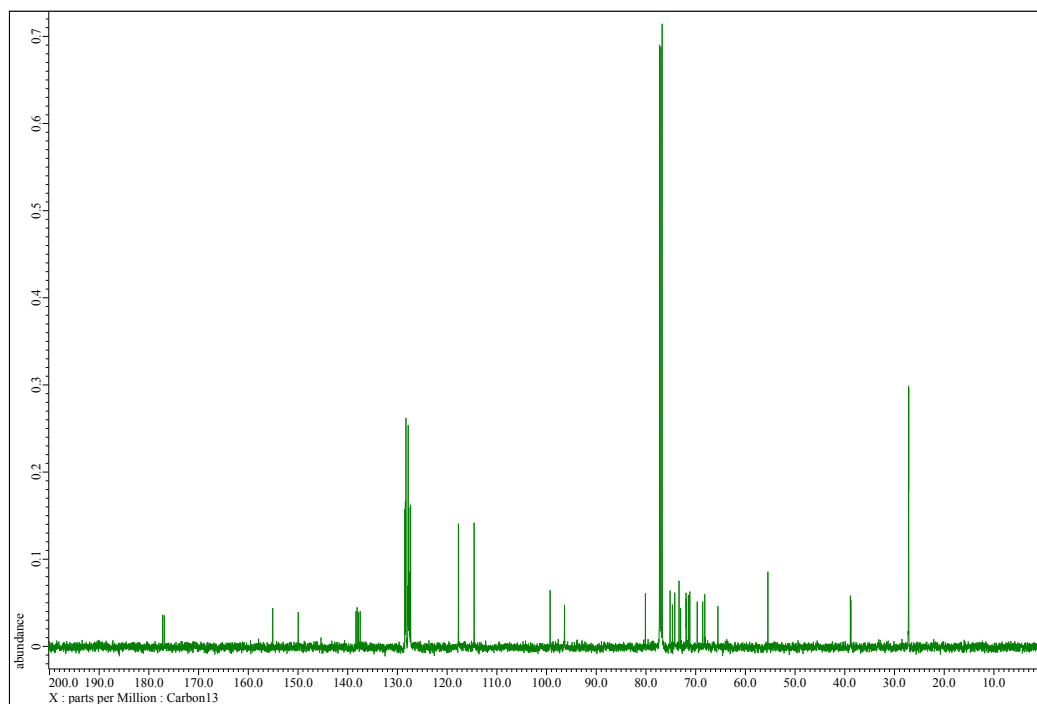

Compound **24** (<sup>1</sup>H NMR) in CDCl<sub>3</sub>

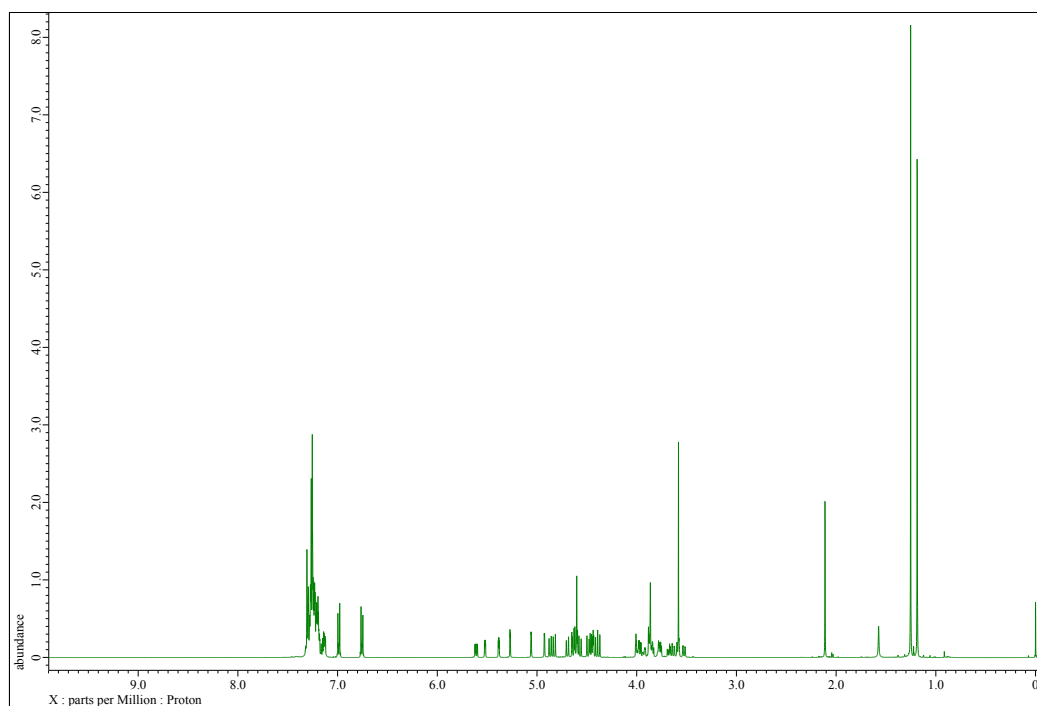

Compound **24** ( $^{13}\text{C}$  NMR) in  $\text{CDCl}_3$

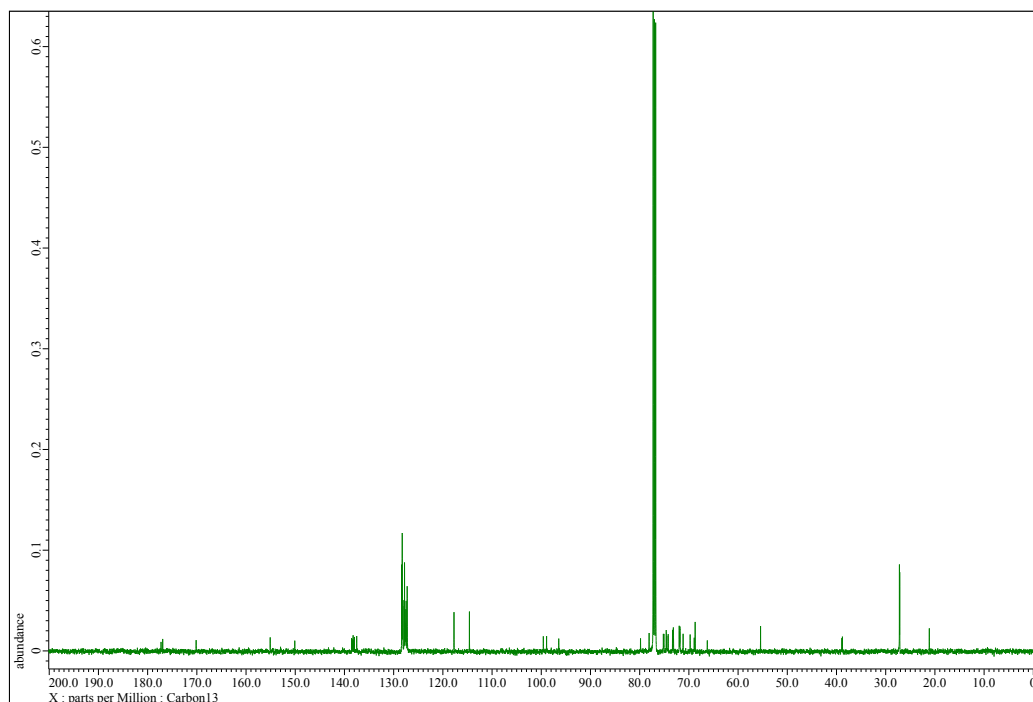

Compound **24** (Non-decoupling HMQC) in  $\text{CDCl}_3$

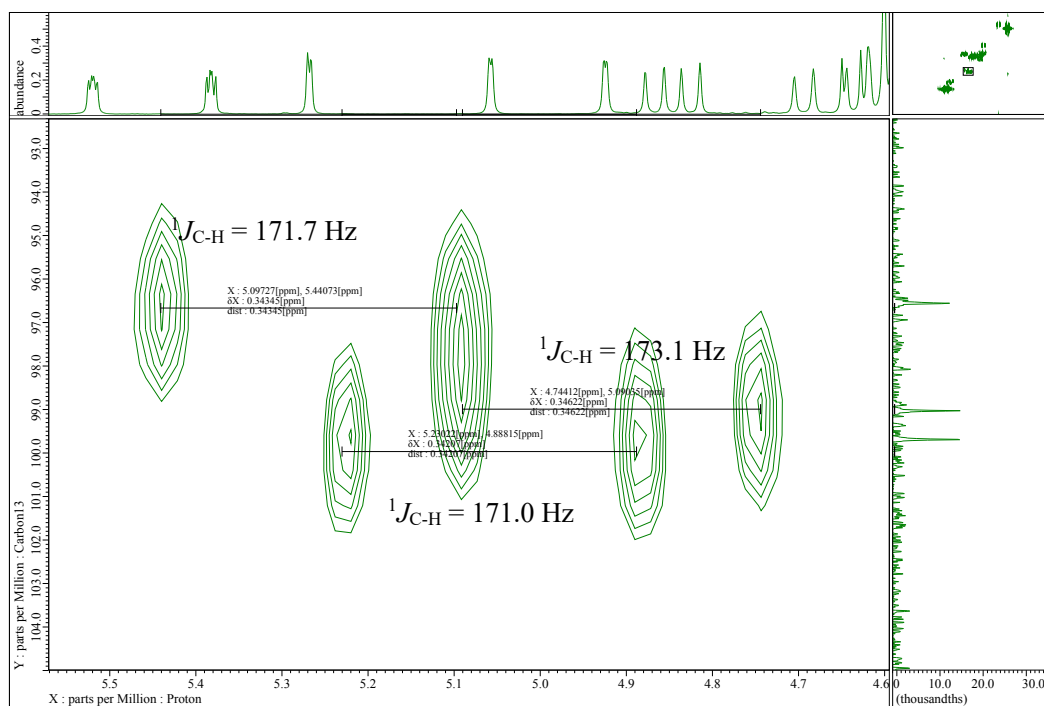

Compound **25** ( $^1\text{H}$  NMR) in  $\text{CDCl}_3$

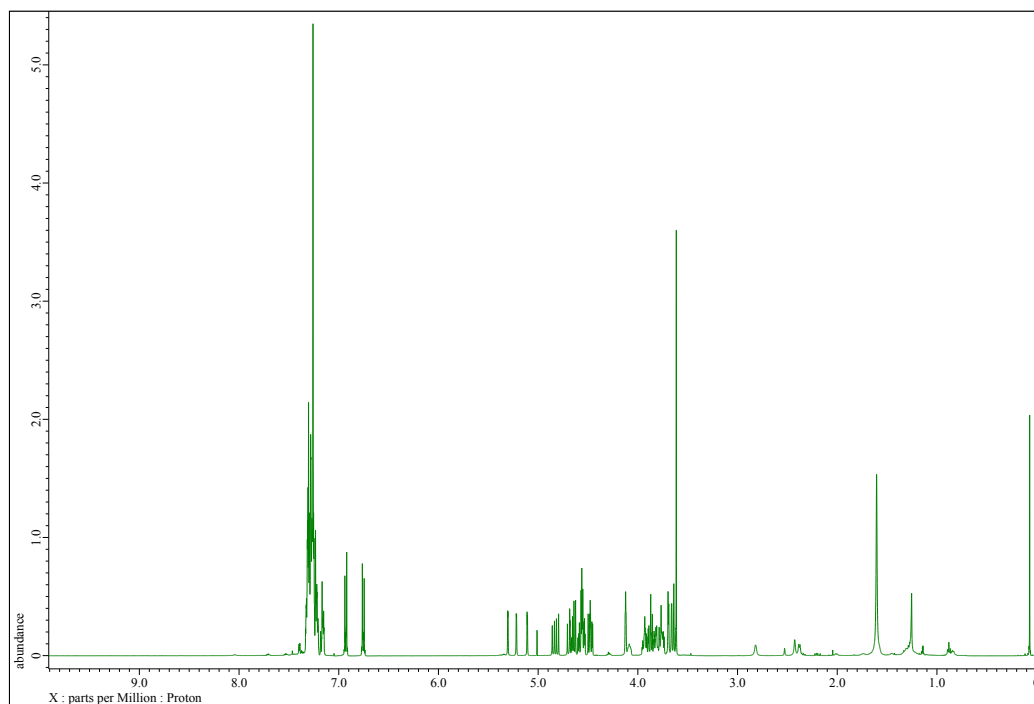

Compound **25** ( $^{13}\text{C}$  NMR) in  $\text{CDCl}_3$

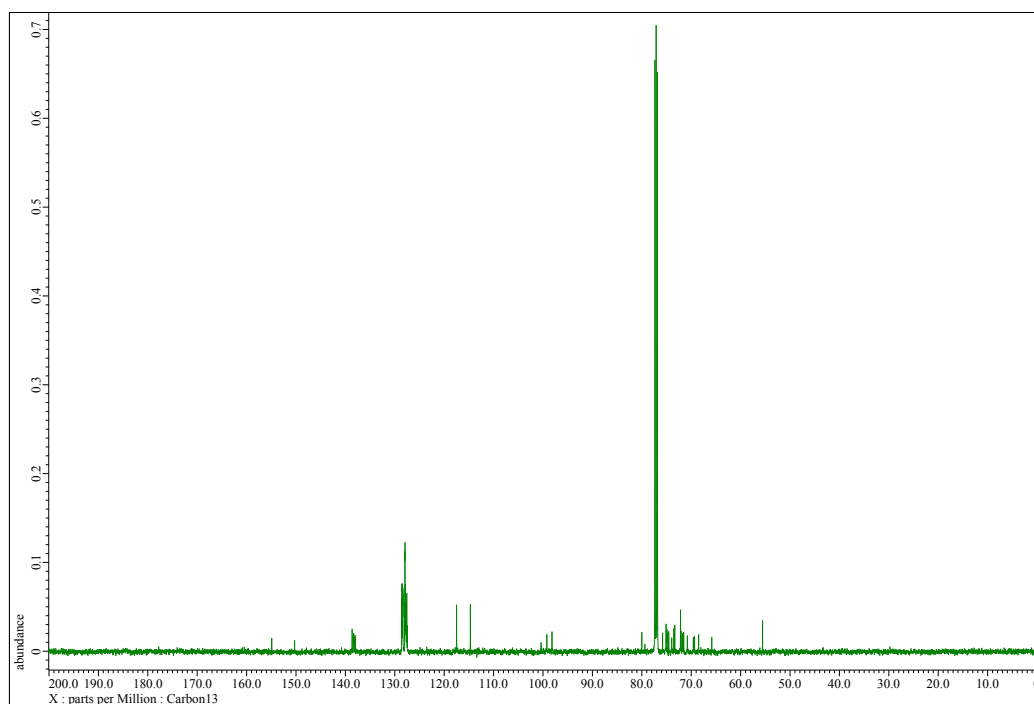

Compound **26** ( $^1\text{H}$  NMR) in  $\text{CDCl}_3$

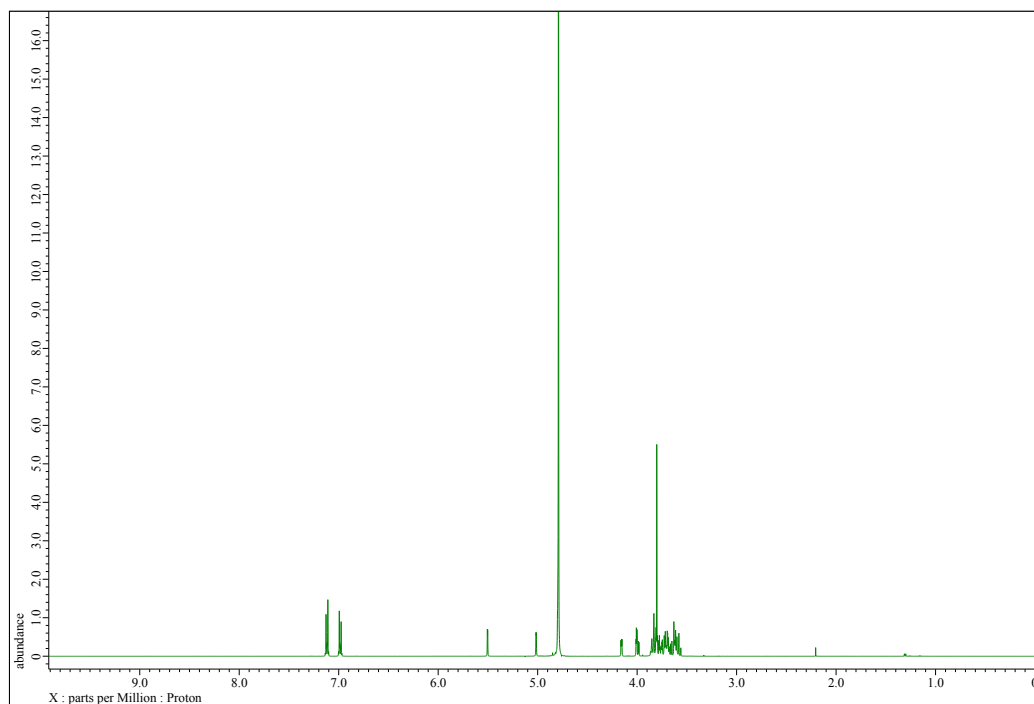

Compound **26** ( $^{13}\text{C}$  NMR) in  $\text{CDCl}_3$

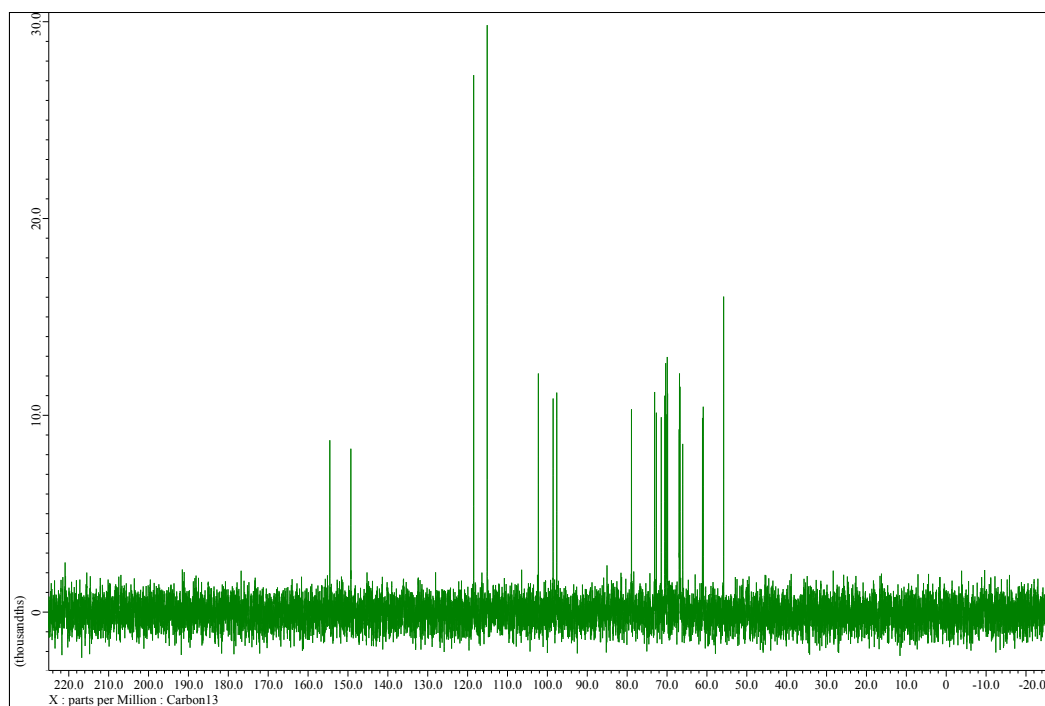

Compound **27** ( $^1\text{H}$  NMR) in  $\text{CDCl}_3$

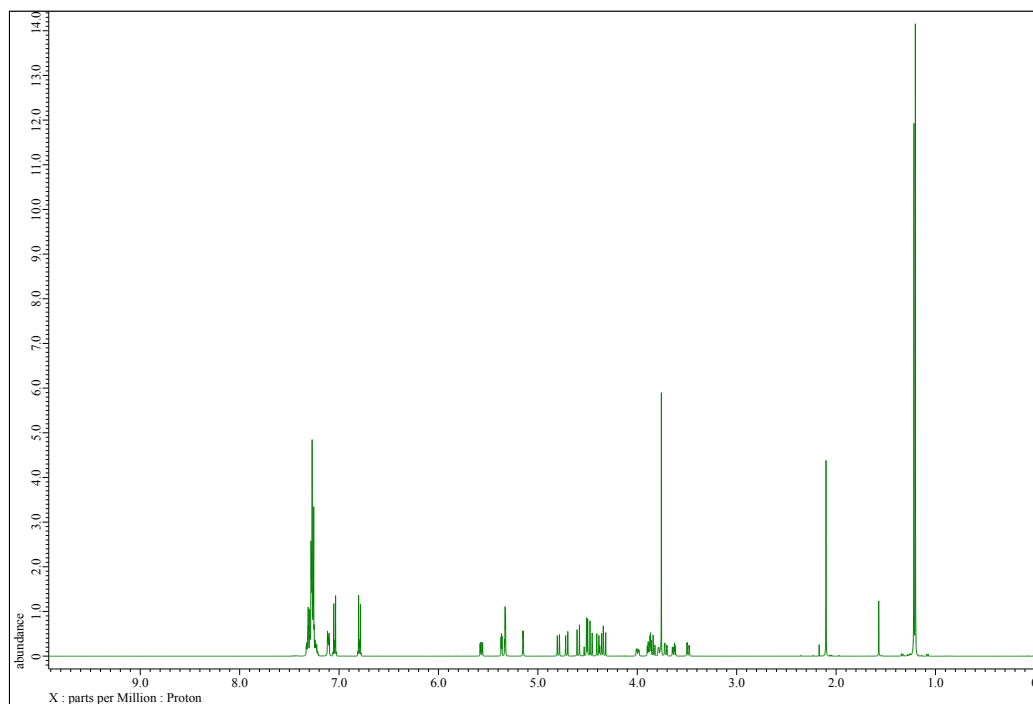

Compound **27** ( $^{13}\text{C}$  NMR) in  $\text{CDCl}_3$

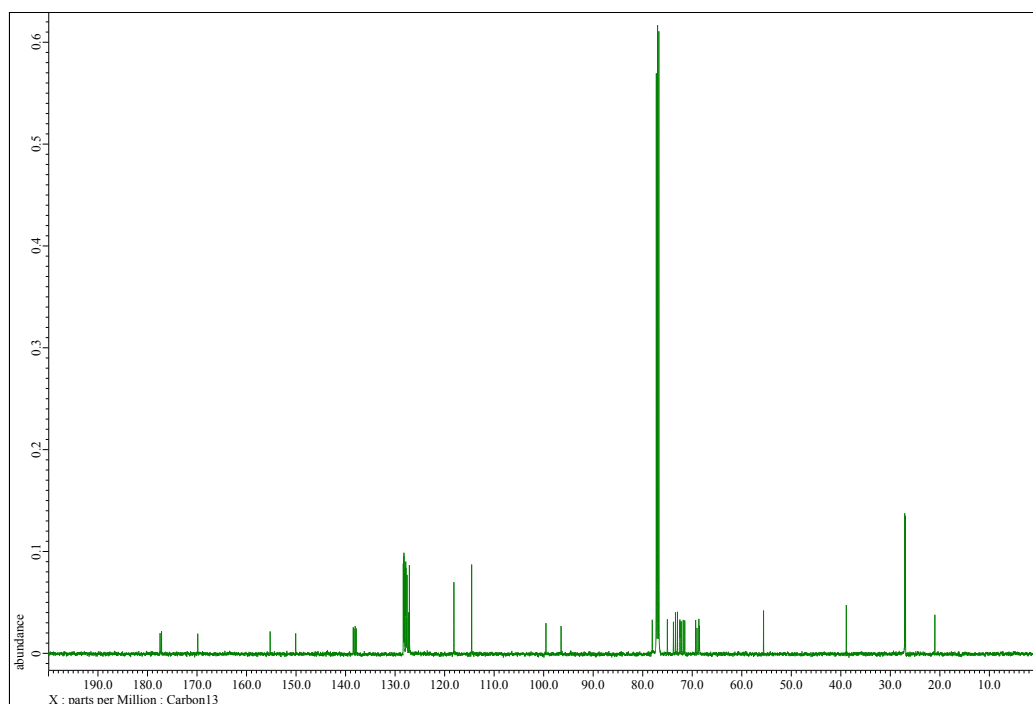

Compound **27** (Non-decoupling HMQC) in CDCl<sub>3</sub>

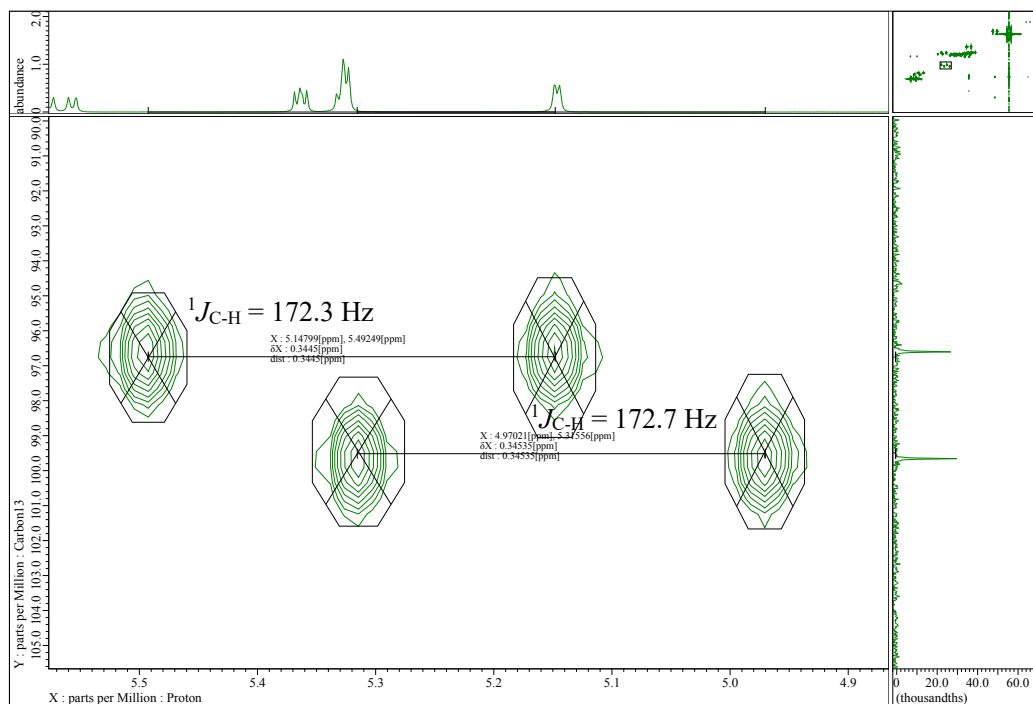

Compound **28** (<sup>1</sup>H NMR) in CDCl<sub>3</sub>

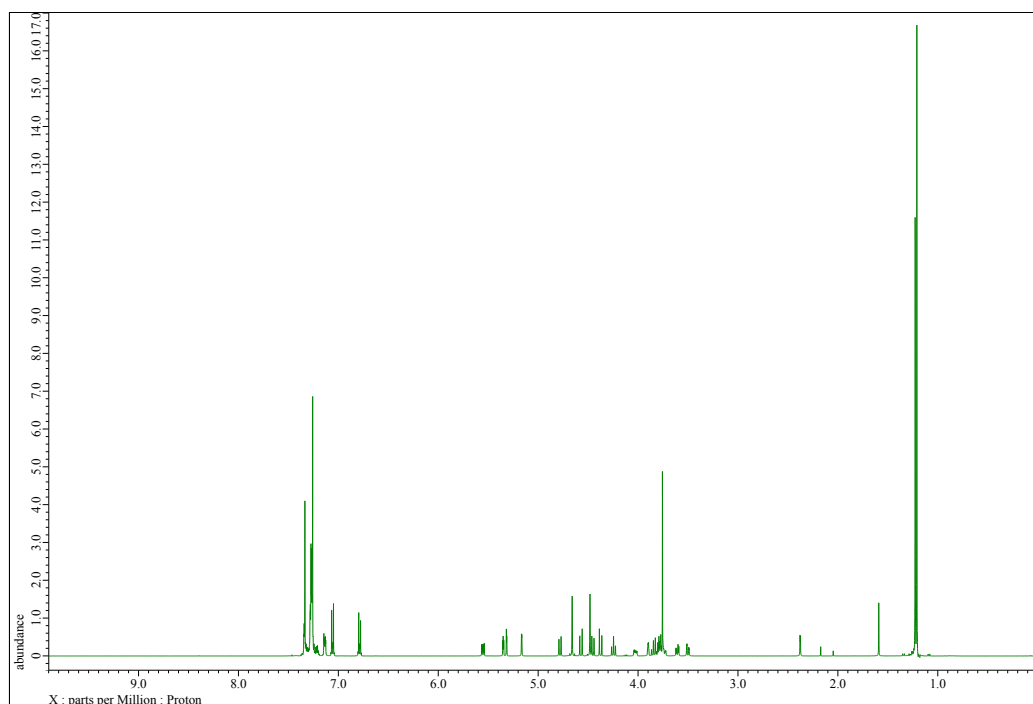

Compound **28** ( $^{13}\text{C}$  NMR) in  $\text{CDCl}_3$

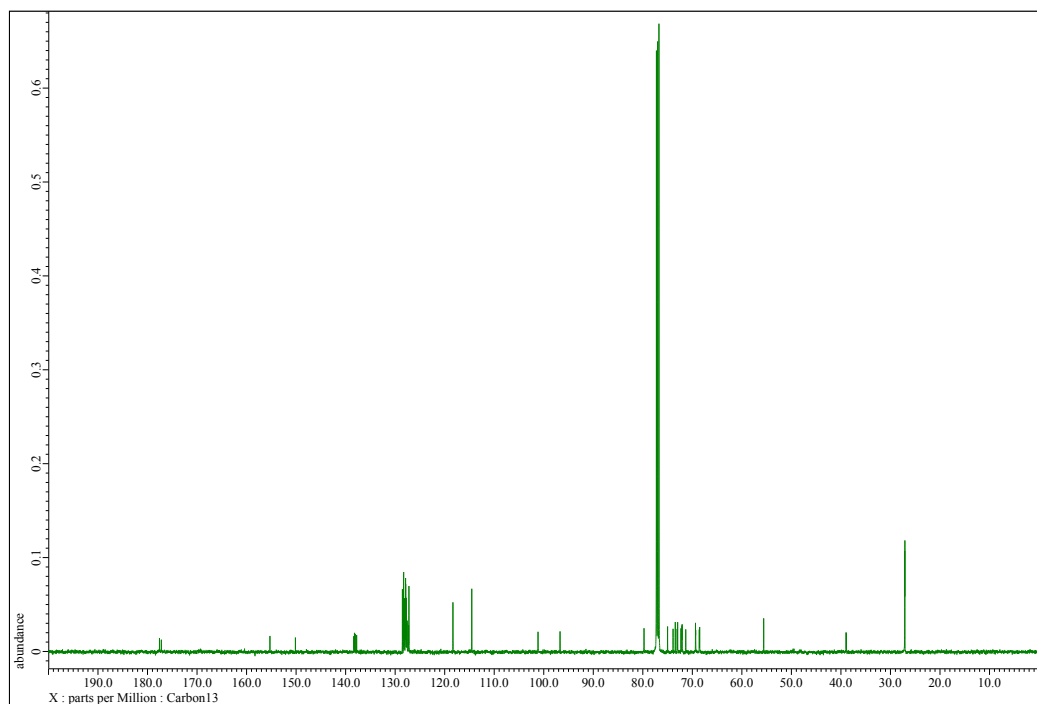

Compound **29** ( $^1\text{H}$  NMR) in  $\text{CDCl}_3$

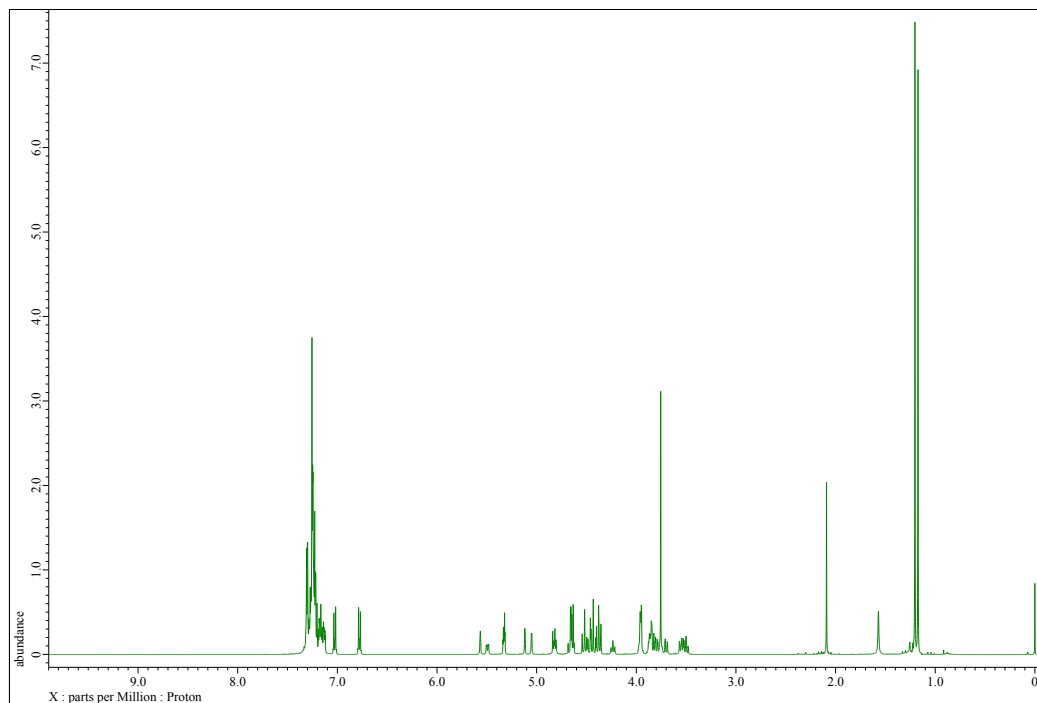

Compound **29** ( $^{13}\text{C}$  NMR) in  $\text{CDCl}_3$

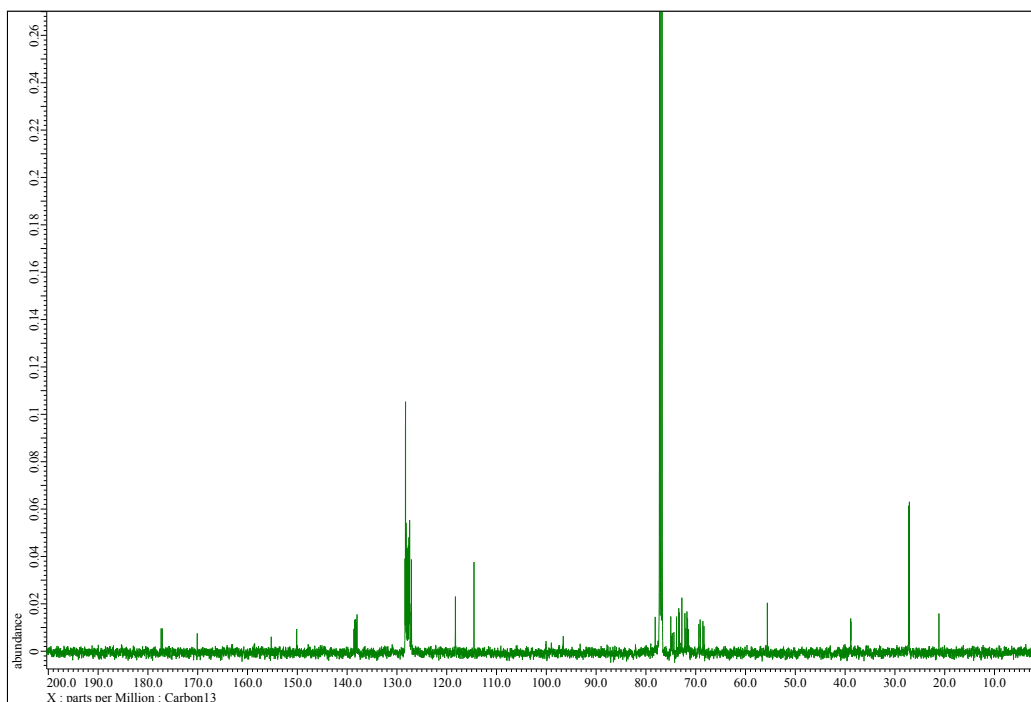

Compound **29** (Non-decoupling HMQC) in  $\text{CDCl}_3$

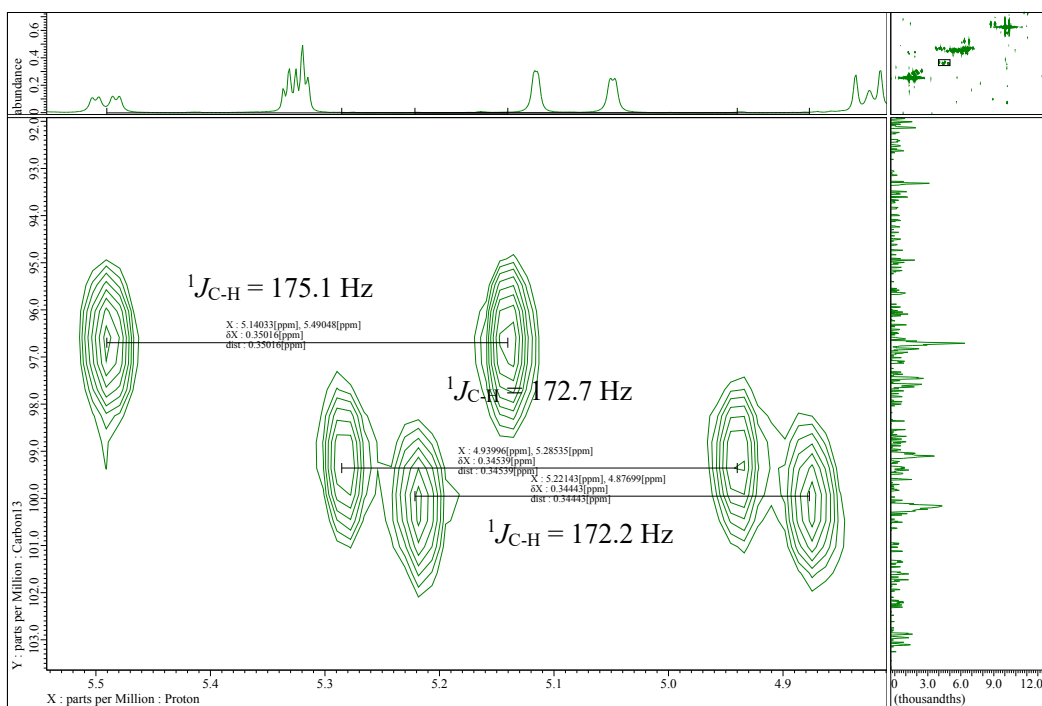

Compound **30** ( $^1\text{H}$  NMR) in  $\text{CDCl}_3$

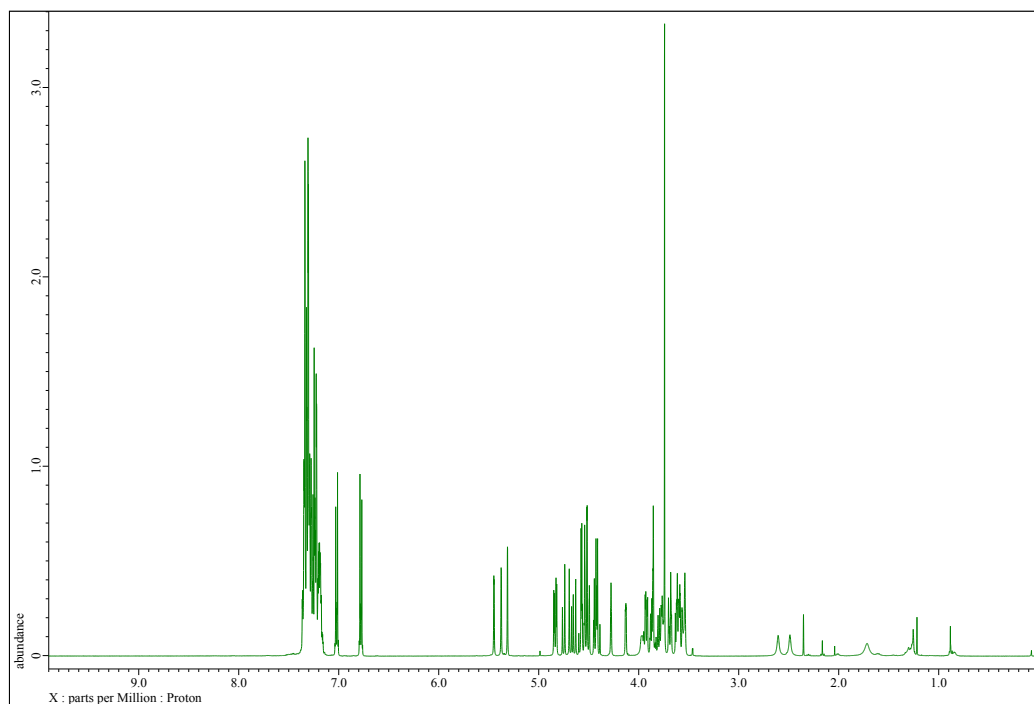

Compound **30** ( $^{13}\text{C}$  NMR) in  $\text{CDCl}_3$

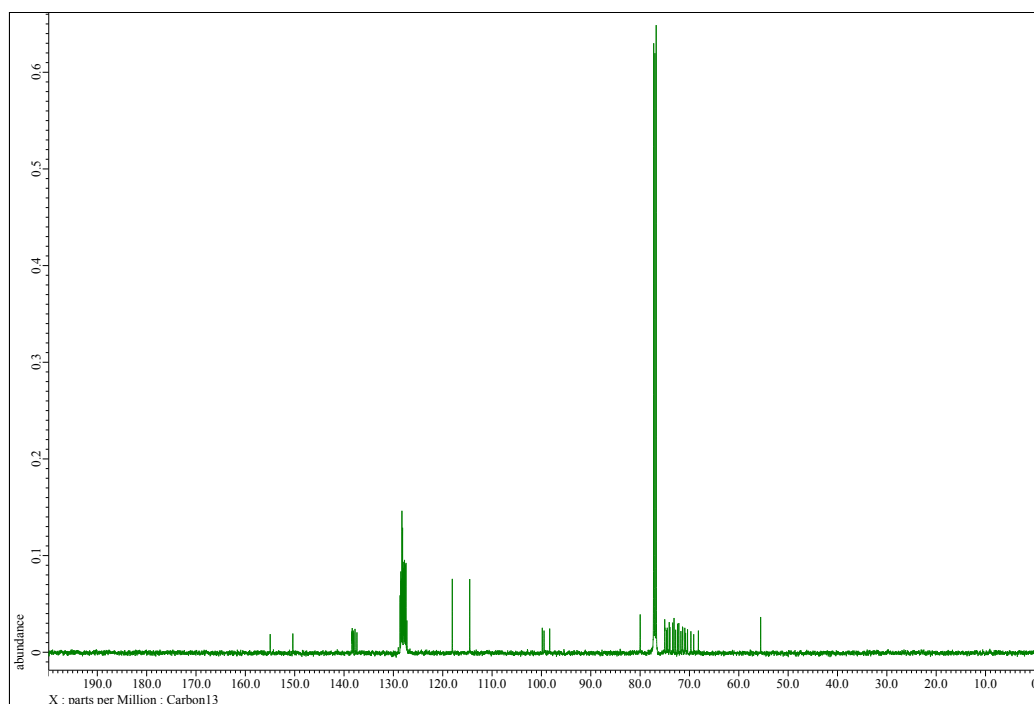

Compound **31** ( $^1\text{H}$  NMR) in  $\text{D}_2\text{O}$

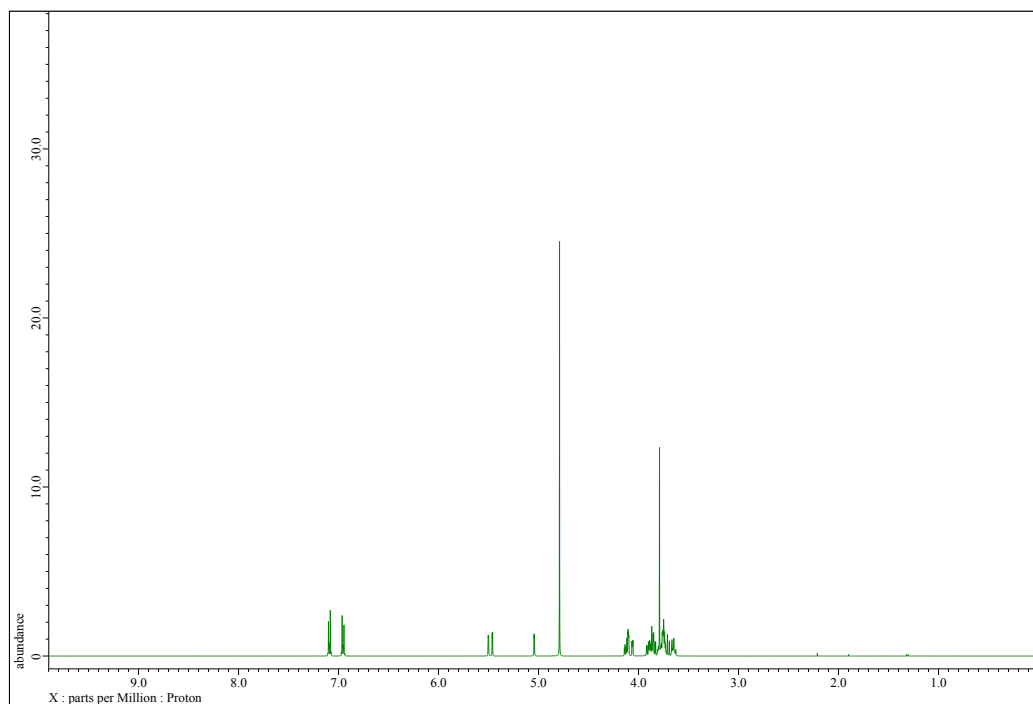

Compound **31** ( $^{13}\text{C}$  NMR) in  $\text{D}_2\text{O}$

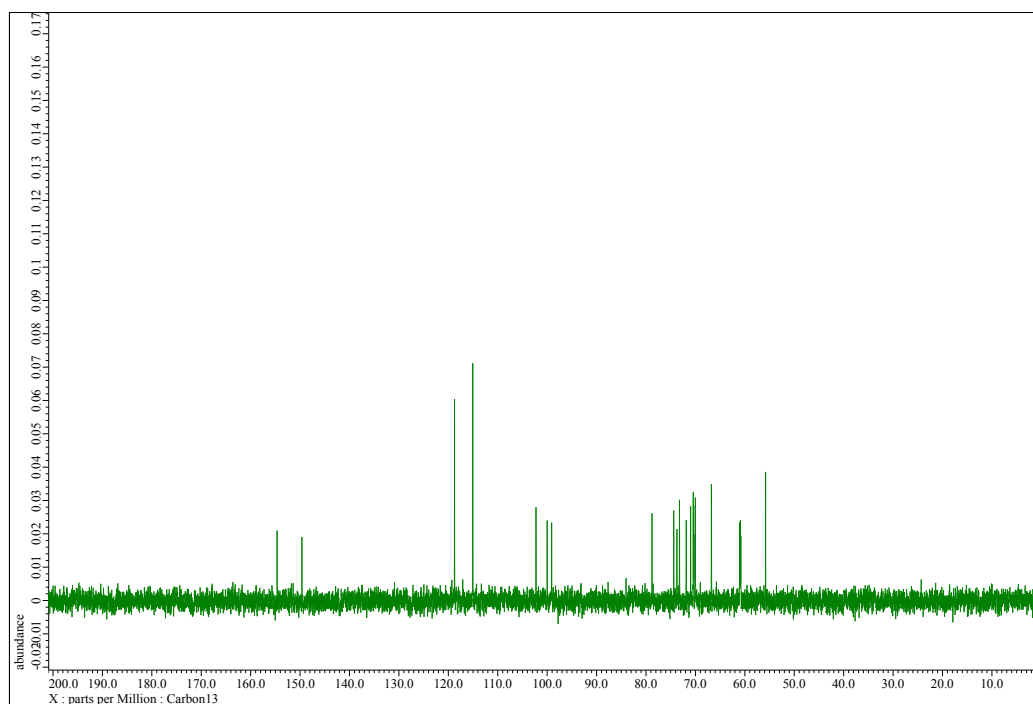

Compound **33** ( $^1\text{H}$  NMR) in  $\text{CDCl}_3$

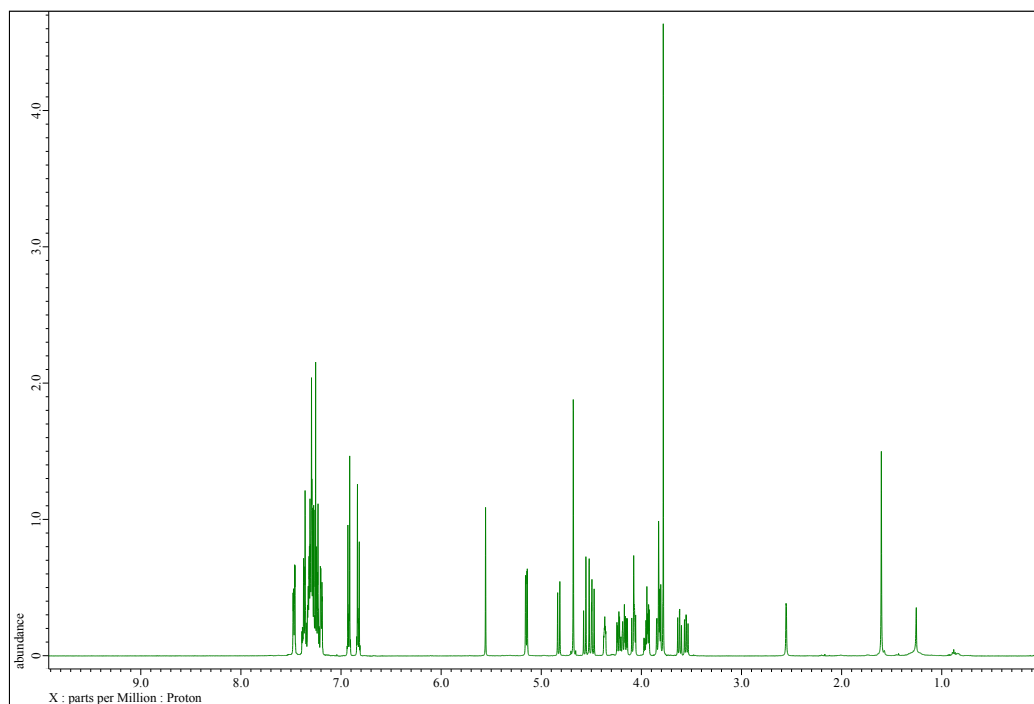

Compound **33** ( $^{13}\text{C}$  NMR) in  $\text{CDCl}_3$

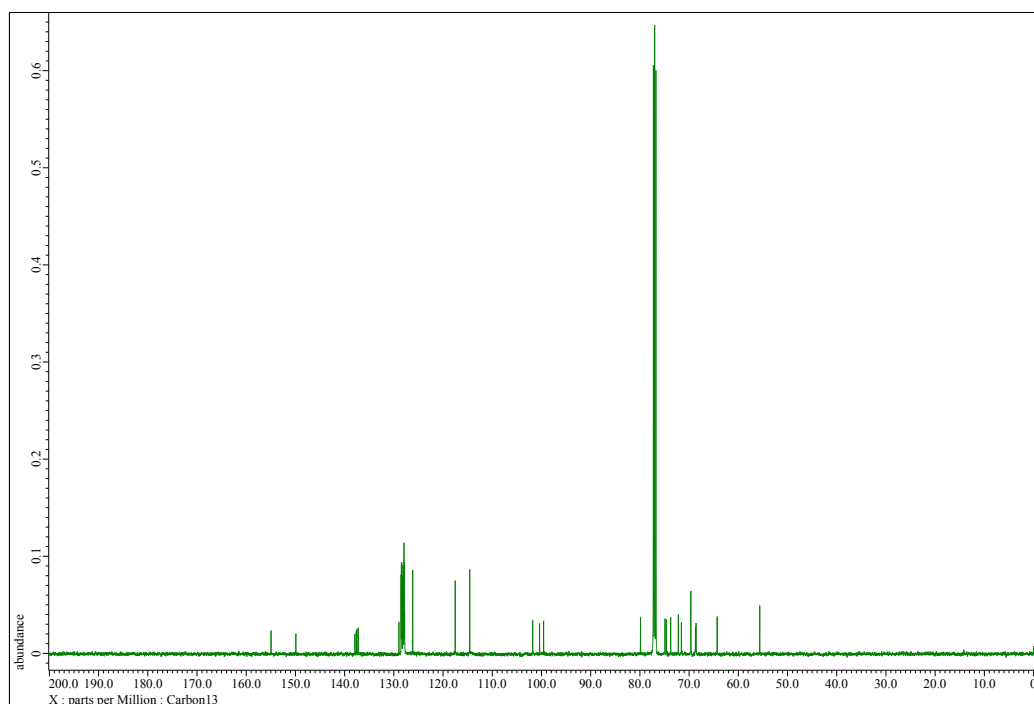

Compound **34** ( $^1\text{H}$  NMR) in  $\text{D}_2\text{O}$

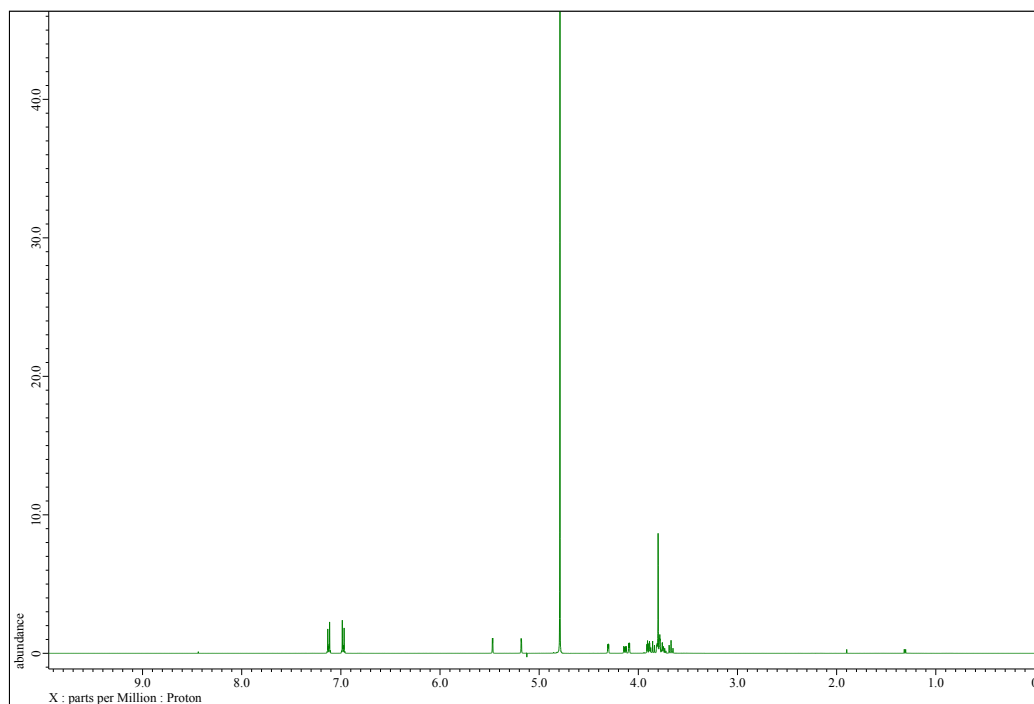

Compound **34** ( $^{13}\text{C}$  NMR) in  $\text{D}_2\text{O}$

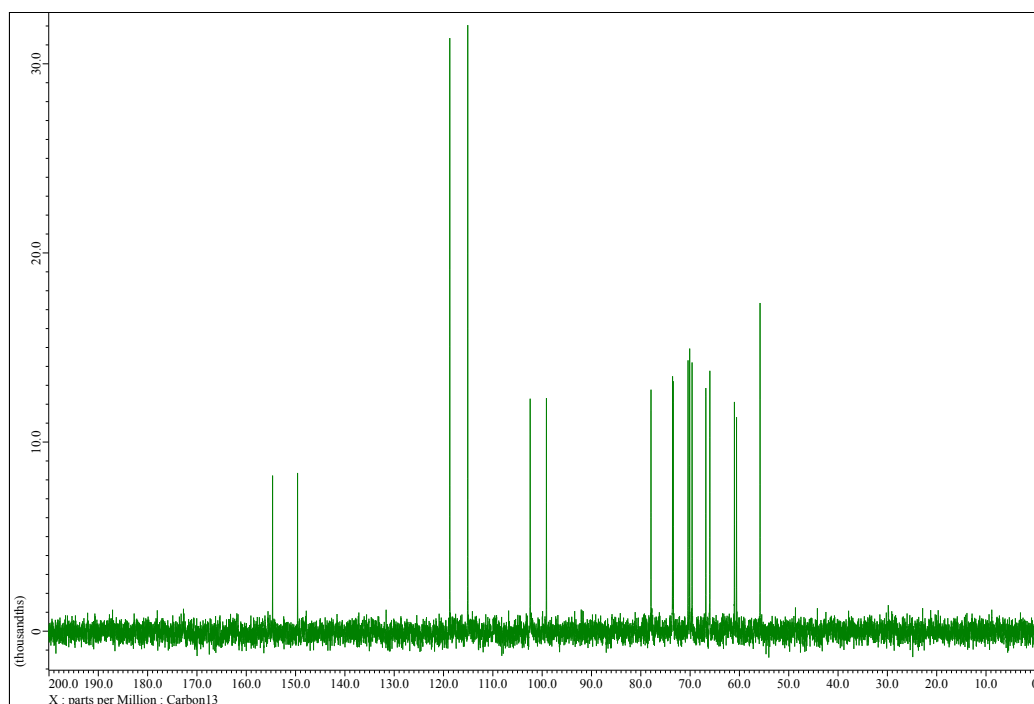

Compound **35** ( $^1\text{H}$  NMR) in  $\text{CDCl}_3$

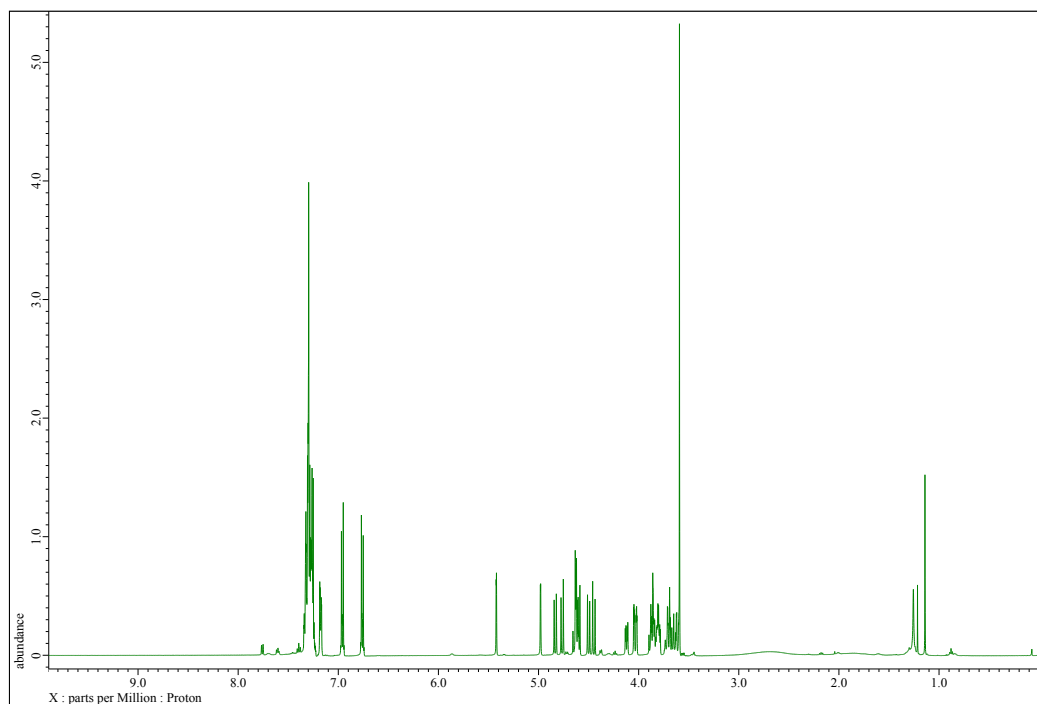

Compound **35** ( $^{13}\text{C}$  NMR) in  $\text{CDCl}_3$

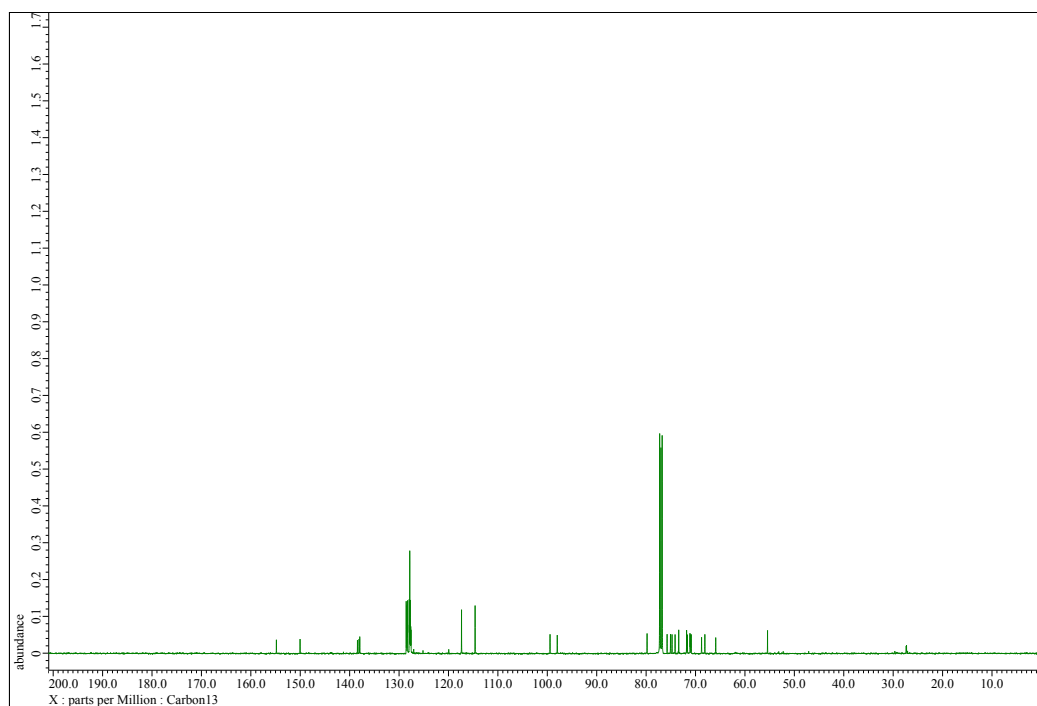

Compound **36** ( $^1\text{H}$  NMR) in  $\text{D}_2\text{O}$

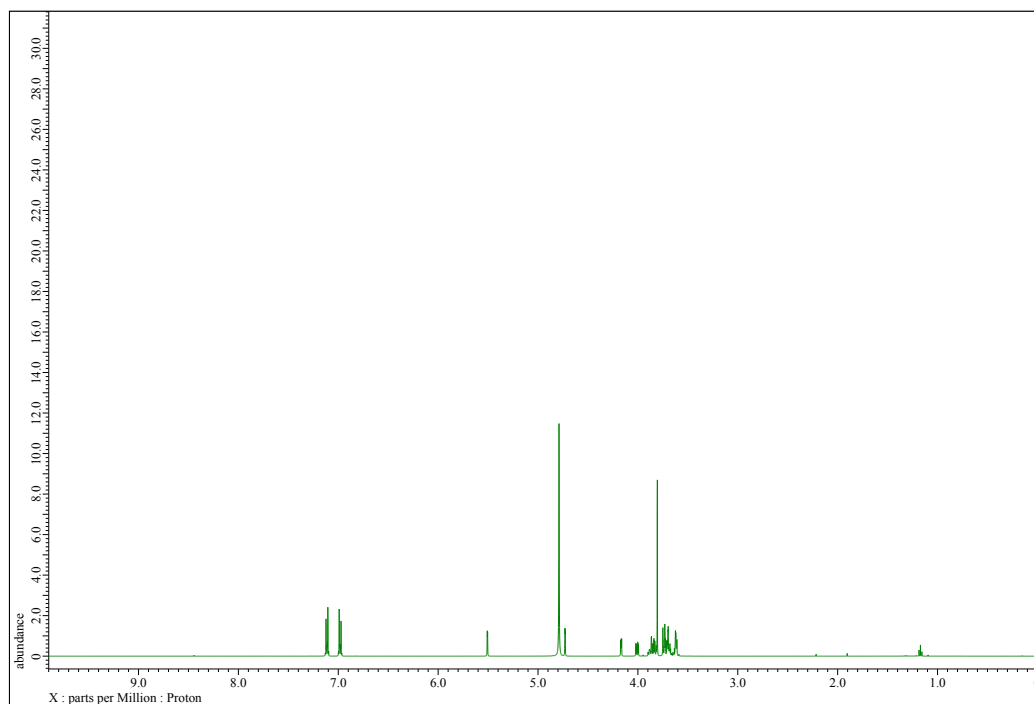

Compound **36** ( $^{13}\text{C}$  NMR) in  $\text{D}_2\text{O}$

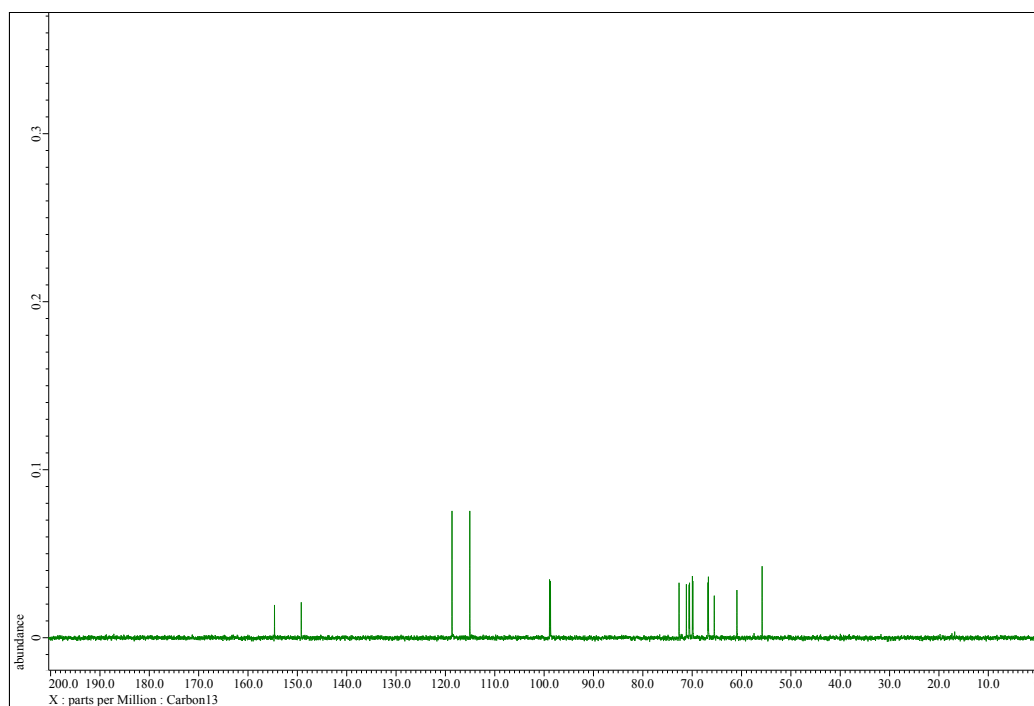

Compound **37** ( $^1\text{H}$  NMR) in  $\text{CD}_3\text{OD}$

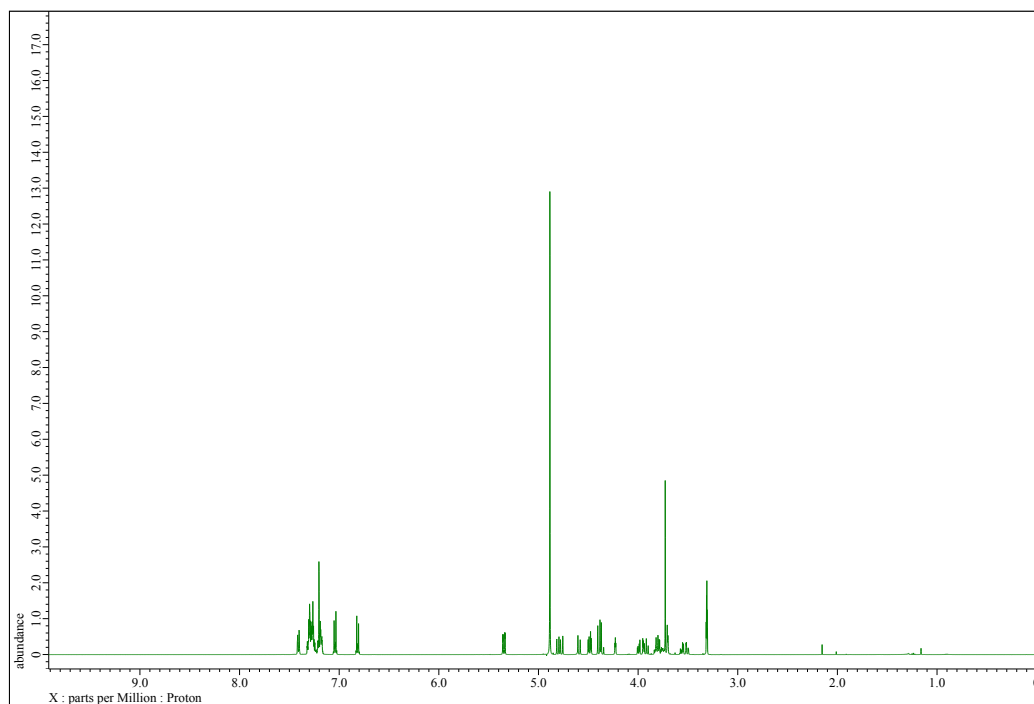

Compound **37** ( $^{13}\text{C}$  NMR) in  $\text{CD}_3\text{OD}$

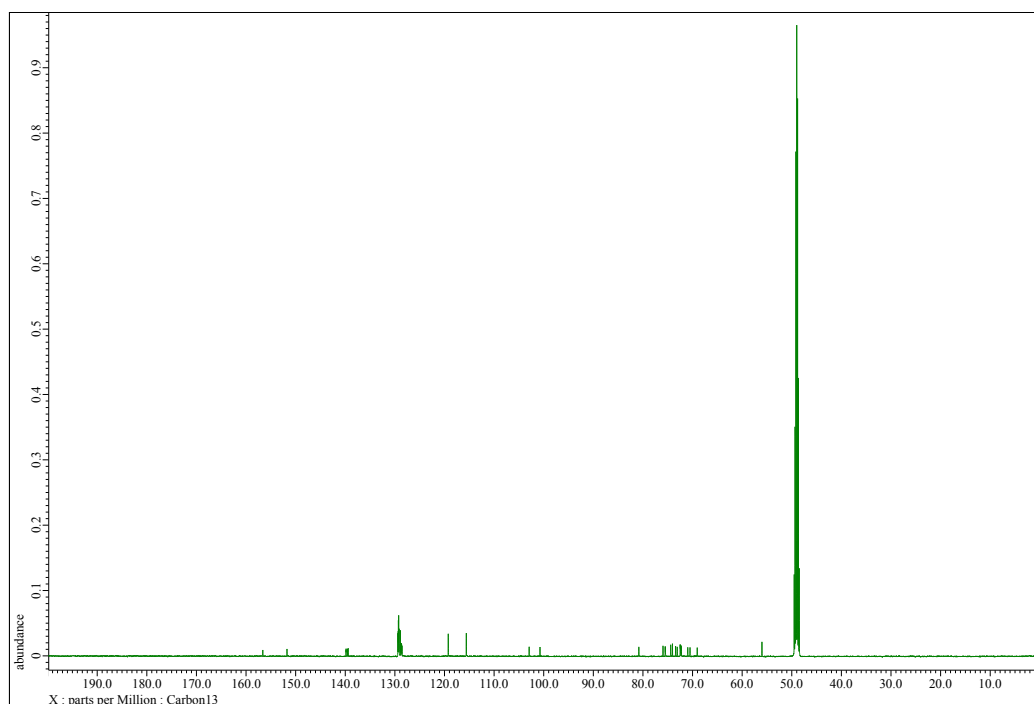

Compound **38** ( $^1\text{H}$  NMR) in  $\text{D}_2\text{O}$

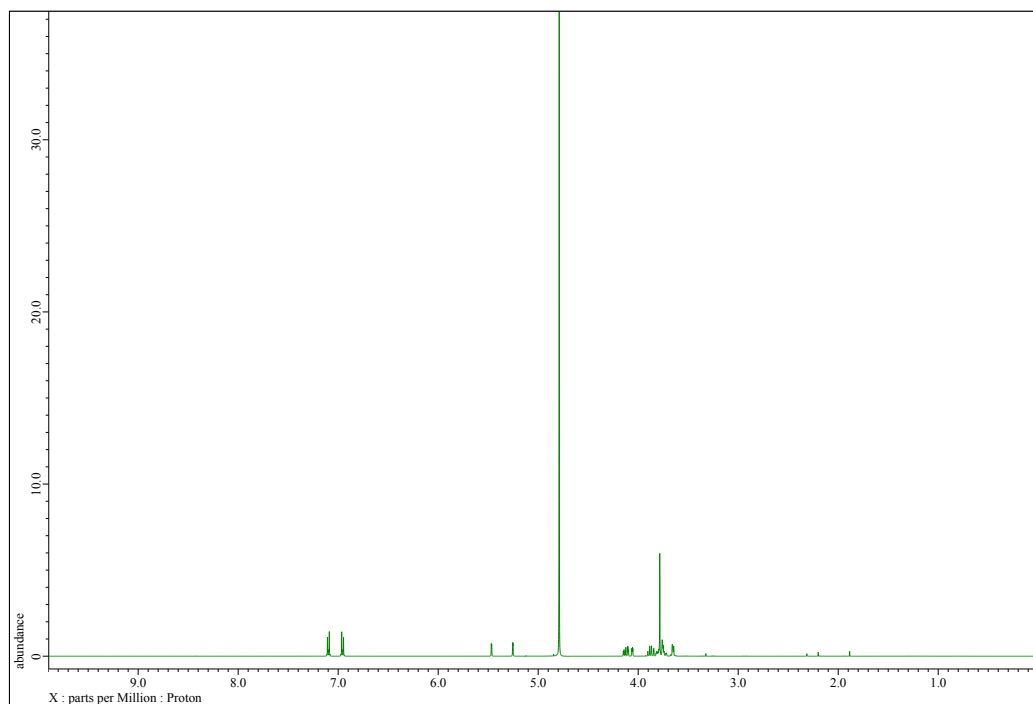

Compound **38** ( $^{13}\text{C}$  NMR) in  $\text{D}_2\text{O}$

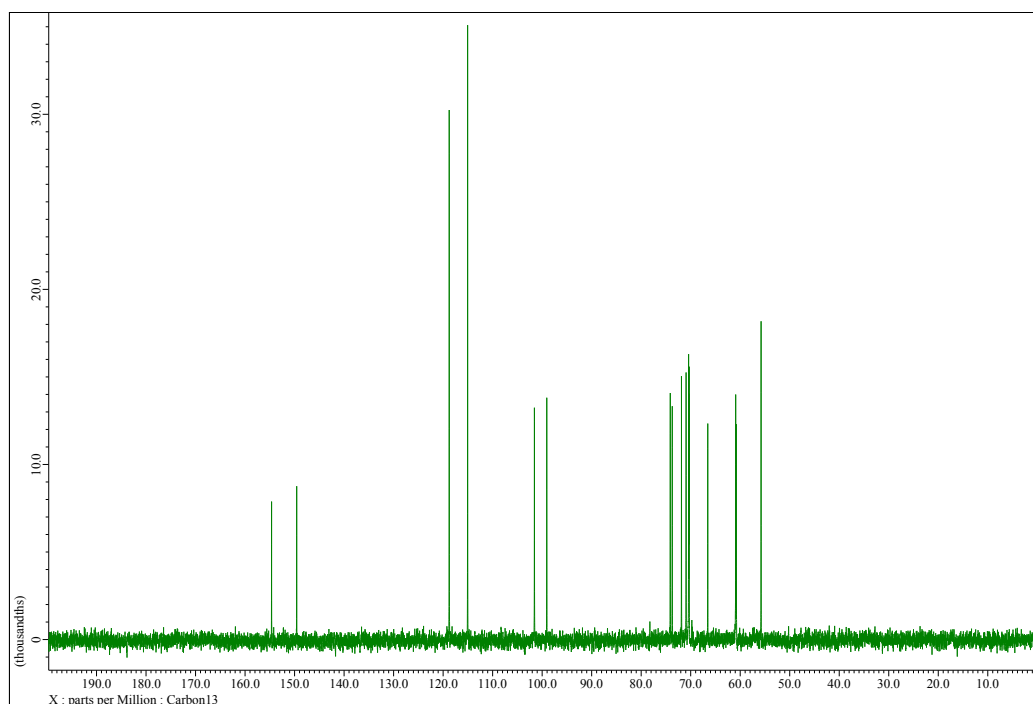

Supplement: d1ob00428j1.pdf [file d1ob00428j1.pdf]
